# Supplementary material for: ChIP-seq accurately predicts tissue-specific activity of enhancers
Source: Springer Nature journal article supplement (doi:10.1038/nature07730), 2009-02-01
Supplement: nature07730-s2.xls [file nature07730-s2.xls]

## Sheet: Notes
Chromosome, start, end	Location of the p300 peak in the mouse reference genome (mm9). The peak boundaries are positions at which coverage falls below 2 reads
Maximum peak height	The maximum coverage of p300 chip-seq reads at any nucleotide within the boundaries of the peak
Total Overlapping Reads	The total number of p300 chip-seq reads overlapping the peak
FDR	The proportion of peaks with the given maximum peak height that would be expected to occur through chance

## Sheet: Suppl. Table 2
Forebrain p300 Peaks (mm9)
Chromosome	Start	End	Maximum Peak Height	Total Overlapping Reads	FDR
chr1	5222650	5223201	7	9	0.00262816
chr1	6719650	6720626	7	16	0.00262816
chr1	11990575	11991426	9	13	1.57601e-05
chr1	12045650	12046551	19	30	<1.0E-10
chr1	12400025	12400476	7	8	0.00262816
chr1	13851050	13851676	7	10	0.00262816
chr1	17106600	17107201	8	10	0.000221307
chr1	20292250	20293451	10	24	9.67541e-07
chr1	23756475	23757026	8	9	0.000221307
chr1	25237575	25237901	7	8	0.00262816
chr1	31290375	31290926	7	9	0.00262816
chr1	34207200	34207926	9	13	1.57601e-05
chr1	34721950	34722701	12	15	2.57318e-09
chr1	37154250	37154751	8	10	0.000221307
chr1	37179075	37180251	7	16	0.00262816
chr1	38560150	38560676	7	9	0.00262816
chr1	40004575	40004951	7	8	0.00262816
chr1	41201575	41202101	7	7	0.00262816
chr1	41222975	41223726	10	15	9.67541e-07
chr1	41446850	41448026	9	23	1.57601e-05
chr1	41661600	41663151	16	47	<1.0E-10
chr1	41870300	41871951	15	32	<1.0E-10
chr1	41975300	41976076	18	25	<1.0E-10
chr1	41992700	41993326	9	13	1.57601e-05
chr1	42300150	42301176	9	18	1.57601e-05
chr1	42314375	42315276	12	22	2.57318e-09
chr1	42747975	42749051	9	21	1.57601e-05
chr1	46886725	46887276	9	10	1.57601e-05
chr1	47154000	47154401	7	7	0.00262816
chr1	47220675	47221201	12	14	2.57318e-09
chr1	51707025	51707926	13	23	1.15182e-10
chr1	51753825	51754751	8	18	0.000221307
chr1	52136275	52137151	8	12	0.000221307
chr1	54848200	54848976	10	14	9.67541e-07
chr1	55971075	55971851	8	11	0.000221307
chr1	56889775	56890676	12	20	2.57318e-09
chr1	56891225	56891901	7	10	0.00262816
chr1	57486775	57487226	9	9	1.57601e-05
chr1	57833200	57834201	7	16	0.00262816
chr1	57918600	57919651	15	27	<1.0E-10
chr1	59373075	59373476	7	7	0.00262816
chr1	59943925	59944876	7	12	0.00262816
chr1	61322400	61323376	12	20	2.57318e-09
chr1	61358250	61360301	18	51	<1.0E-10
chr1	61959400	61959851	7	8	0.00262816
chr1	62099650	62100851	17	27	<1.0E-10
chr1	62980400	62981101	7	13	0.00262816
chr1	63250525	63251176	8	13	0.000221307
chr1	63293700	63294751	14	21	<1.0E-10
chr1	63810350	63810876	7	9	0.00262816
chr1	63865775	63866701	7	14	0.00262816
chr1	63866875	63867901	7	14	0.00262816
chr1	63875100	63875651	9	10	1.57601e-05
chr1	64113100	64114276	24	35	<1.0E-10
chr1	64963450	64964026	11	14	5.24115e-08
chr1	67412650	67413501	10	16	9.67541e-07
chr1	68093250	68094601	7	19	0.00262816
chr1	70671375	70671851	8	10	0.000221307
chr1	72852675	72853226	8	9	0.000221307
chr1	73215725	73216651	7	12	0.00262816
chr1	73804975	73805676	7	11	0.00262816
chr1	76487000	76488176	9	20	1.57601e-05
chr1	77528925	77529476	7	7	0.00262816
chr1	78590325	78590751	7	8	0.00262816
chr1	80029750	80030426	7	10	0.00262816
chr1	81517000	81518326	16	35	<1.0E-10
chr1	81584250	81585051	8	15	0.000221307
chr1	81589550	81590976	10	26	9.67541e-07
chr1	82316775	82317351	10	12	9.67541e-07
chr1	82540825	82541301	7	8	0.00262816
chr1	84151775	84152501	7	9	0.00262816
chr1	84546025	84546726	10	13	9.67541e-07
chr1	88331000	88331501	10	12	9.67541e-07
chr1	90565025	90565976	10	16	9.67541e-07
chr1	90735950	90737251	13	30	1.15182e-10
chr1	90820625	90821176	17	19	<1.0E-10
chr1	90968900	90969926	7	16	0.00262816
chr1	91079875	91080501	16	22	<1.0E-10
chr1	91647375	91648251	7	13	0.00262816
chr1	93310100	93311701	16	37	<1.0E-10
chr1	93966800	93967276	10	12	9.67541e-07
chr1	94120650	94121526	7	14	0.00262816
chr1	94633925	94634826	10	20	9.67541e-07
chr1	94976250	94976851	8	10	0.000221307
chr1	97348275	97349051	9	12	1.57601e-05
chr1	98197700	98198351	7	10	0.00262816
chr1	99437175	99437901	7	12	0.00262816
chr1	99519100	99520126	9	17	1.57601e-05
chr1	99944725	99945376	9	13	1.57601e-05
chr1	100086550	100087226	11	15	5.24115e-08
chr1	102313100	102314151	12	18	2.57318e-09
chr1	108096050	108096676	9	12	1.57601e-05
chr1	109874900	109875651	8	14	0.000221307
chr1	120377125	120378076	8	16	0.000221307
chr1	120807125	120808476	10	24	9.67541e-07
chr1	121225575	121226551	8	16	0.000221307
chr1	128578150	128578651	8	9	0.000221307
chr1	128580400	128581101	7	11	0.00262816
chr1	128726950	128727926	15	22	<1.0E-10
chr1	129427475	129428326	10	17	9.67541e-07
chr1	130301300	130302276	16	28	<1.0E-10
chr1	130474900	130475426	7	9	0.00262816
chr1	131104850	131105476	7	10	0.00262816
chr1	131540875	131541676	8	13	0.000221307
chr1	132975175	132976176	20	32	<1.0E-10
chr1	132992175	132992751	8	11	0.000221307
chr1	133867250	133869101	10	30	9.67541e-07
chr1	134218600	134219826	14	28	<1.0E-10
chr1	134632650	134633401	7	10	0.00262816
chr1	134976575	134977476	19	30	<1.0E-10
chr1	135078925	135080726	8	25	0.000221307
chr1	135084175	135085051	9	17	1.57601e-05
chr1	135092625	135093376	7	10	0.00262816
chr1	135294025	135294801	8	12	0.000221307
chr1	135957250	135958101	7	13	0.00262816
chr1	135958900	135960626	16	53	<1.0E-10
chr1	138130275	138130901	7	9	0.00262816
chr1	139269750	139270901	8	17	0.000221307
chr1	139274700	139275701	14	23	<1.0E-10
chr1	139553300	139554051	11	16	5.24115e-08
chr1	139795725	139798001	8	28	0.000221307
chr1	140396600	140397601	11	19	5.24115e-08
chr1	141242925	141243551	7	10	0.00262816
chr1	141272250	141272951	8	12	0.000221307
chr1	145042050	145042701	9	14	1.57601e-05
chr1	146024200	146024951	9	12	1.57601e-05
chr1	151743525	151744001	8	8	0.000221307
chr1	153004825	153005801	16	24	<1.0E-10
chr1	154403050	154403901	10	15	9.67541e-07
chr1	155488475	155489376	13	22	1.15182e-10
chr1	155512050	155512851	7	11	0.00262816
chr1	155550300	155551126	10	18	9.67541e-07
chr1	155825200	155825751	13	15	1.15182e-10
chr1	156929850	156930576	8	13	0.000221307
chr1	157080975	157081576	7	10	0.00262816
chr1	158768775	158769201	7	8	0.00262816
chr1	158978325	158978726	7	7	0.00262816
chr1	159383175	159384001	12	17	2.57318e-09
chr1	159899625	159900376	9	14	1.57601e-05
chr1	160196625	160197501	9	14	1.57601e-05
chr1	160466825	160467551	7	10	0.00262816
chr1	160945300	160946026	8	13	0.000221307
chr1	162464700	162465626	10	18	9.67541e-07
chr1	164762275	164763026	9	13	1.57601e-05
chr1	167211500	167211801	7	7	0.00262816
chr1	167743825	167745176	12	31	2.57318e-09
chr1	167844025	167844601	7	9	0.00262816
chr1	167864800	167866051	12	31	2.57318e-09
chr1	167896425	167897276	18	24	<1.0E-10
chr1	168212750	168213301	7	9	0.00262816
chr1	169324000	169324476	7	7	0.00262816
chr1	169732350	169733426	7	16	0.00262816
chr1	170480150	170480626	9	10	1.57601e-05
chr1	170500150	170500751	12	16	2.57318e-09
chr1	170838200	170839376	14	27	<1.0E-10
chr1	173910000	173910951	11	20	5.24115e-08
chr1	174279700	174280901	8	23	0.000221307
chr1	179080250	179081526	42	70	<1.0E-10
chr1	179252875	179253301	7	8	0.00262816
chr1	179341275	179341851	8	11	0.000221307
chr1	179374075	179374901	13	18	1.15182e-10
chr1	180750750	180751726	10	15	9.67541e-07
chr1	180790350	180791451	7	15	0.00262816
chr1	183189200	183190351	7	16	0.00262816
chr1	184753975	184754626	7	11	0.00262816
chr1	185889475	185890651	17	28	<1.0E-10
chr1	188900350	188901476	9	17	1.57601e-05
chr1	189180200	189180651	9	10	1.57601e-05
chr1	189789925	189790476	7	9	0.00262816
chr1	191011125	191012501	13	29	1.15182e-10
chr1	191615425	191616076	12	15	2.57318e-09
chr1	192551300	192552876	11	29	5.24115e-08
chr1	195606675	195607051	9	9	1.57601e-05
chr1	195986750	195988176	10	23	9.67541e-07
chr10	6238300	6238926	7	10	0.00262816
chr10	7757450	7758801	11	24	5.24115e-08
chr10	8992150	8992551	7	8	0.00262816
chr10	9265550	9266026	7	8	0.00262816
chr10	10567575	10568126	7	9	0.00262816
chr10	12827325	12828951	12	31	2.57318e-09
chr10	12836750	12837751	11	20	5.24115e-08
chr10	13135125	13136301	13	29	1.15182e-10
chr10	15772100	15773251	14	29	<1.0E-10
chr10	16949750	16950601	8	14	0.000221307
chr10	16958150	16958726	8	11	0.000221307
chr10	17547050	17547476	7	7	0.00262816
chr10	18095075	18095651	7	10	0.00262816
chr10	18177475	18178626	13	23	1.15182e-10
chr10	18996800	18997851	13	24	1.15182e-10
chr10	19029875	19030676	12	16	2.57318e-09
chr10	19049025	19049676	7	11	0.00262816
chr10	19058675	19059226	8	10	0.000221307
chr10	20801875	20802726	17	27	<1.0E-10
chr10	21629700	21630126	7	8	0.00262816
chr10	24127225	24127701	9	9	1.57601e-05
chr10	26047200	26047851	7	10	0.00262816
chr10	26721525	26721976	7	8	0.00262816
chr10	29814375	29814876	7	9	0.00262816
chr10	30125600	30126576	8	15	0.000221307
chr10	32590475	32591276	7	12	0.00262816
chr10	36797900	36798876	8	16	0.000221307
chr10	36858900	36859476	7	9	0.00262816
chr10	36970775	36971351	7	9	0.00262816
chr10	37097600	37098751	11	21	5.24115e-08
chr10	37116975	37117801	9	15	1.57601e-05
chr10	37160050	37160751	8	12	0.000221307
chr10	37386175	37387526	10	23	9.67541e-07
chr10	38273025	38274351	32	71	<1.0E-10
chr10	39040725	39041726	9	19	1.57601e-05
chr10	39379150	39380101	16	27	<1.0E-10
chr10	40662575	40663076	11	12	5.24115e-08
chr10	41436325	41436826	7	8	0.00262816
chr10	41941000	41941626	10	13	9.67541e-07
chr10	42059750	42060501	8	13	0.000221307
chr10	42427750	42428276	7	8	0.00262816
chr10	42874650	42875176	10	10	9.67541e-07
chr10	43037200	43037876	7	11	0.00262816
chr10	44606850	44607351	7	8	0.00262816
chr10	45130250	45130901	7	10	0.00262816
chr10	46417700	46418201	7	8	0.00262816
chr10	46642275	46642951	7	10	0.00262816
chr10	48975925	48976451	14	16	<1.0E-10
chr10	49042225	49042676	8	9	0.000221307
chr10	50872975	50873926	7	16	0.00262816
chr10	50977125	50978151	10	20	9.67541e-07
chr10	51546225	51546826	7	10	0.00262816
chr10	51681275	51681651	7	7	0.00262816
chr10	52462200	52463251	18	30	<1.0E-10
chr10	57447250	57447726	7	8	0.00262816
chr10	57503850	57505051	15	32	<1.0E-10
chr10	57542175	57542776	19	22	<1.0E-10
chr10	58412450	58413276	7	14	0.00262816
chr10	58553125	58553701	9	12	1.57601e-05
chr10	61721225	61721526	7	8	0.00262816
chr10	62328000	62328451	7	8	0.00262816
chr10	66021025	66021551	7	8	0.00262816
chr10	66382700	66383951	7	19	0.00262816
chr10	66466025	66467401	10	26	9.67541e-07
chr10	66567150	66567651	8	9	0.000221307
chr10	68928275	68928876	9	11	1.57601e-05
chr10	69947550	69948076	10	12	9.67541e-07
chr10	71217425	71218201	8	13	0.000221307
chr10	79117550	79118001	8	9	0.000221307
chr10	82673475	82674301	7	12	0.00262816
chr10	84322350	84322826	7	8	0.00262816
chr10	84647850	84648251	7	8	0.00262816
chr10	86521125	86521576	7	7	0.00262816
chr10	86564250	86565101	9	15	1.57601e-05
chr10	86788575	86788951	7	7	0.00262816
chr10	86910025	86911301	10	24	9.67541e-07
chr10	86951650	86952826	7	19	0.00262816
chr10	88896975	88898176	23	36	<1.0E-10
chr10	91344350	91344851	9	10	1.57601e-05
chr10	91544000	91544476	10	10	9.67541e-07
chr10	91625600	91626951	9	20	1.57601e-05
chr10	92018625	92020426	22	56	<1.0E-10
chr10	92545650	92546226	7	9	0.00262816
chr10	92726150	92726701	7	9	0.00262816
chr10	92745350	92746076	18	25	<1.0E-10
chr10	92837000	92838126	8	17	0.000221307
chr10	94702050	94702801	7	11	0.00262816
chr10	95771150	95772176	12	19	2.57318e-09
chr10	96108200	96109351	14	26	<1.0E-10
chr10	96418075	96419401	7	21	0.00262816
chr10	96941875	96942851	7	15	0.00262816
chr10	99573550	99574301	7	13	0.00262816
chr10	104817575	104818601	15	34	<1.0E-10
chr10	104921425	104922276	7	13	0.00262816
chr10	105363475	105364301	10	15	9.67541e-07
chr10	109121700	109122226	7	9	0.00262816
chr10	109979800	109980226	7	7	0.00262816
chr10	110368175	110368726	7	8	0.00262816
chr10	115008075	115008901	10	16	9.67541e-07
chr10	118396450	118397351	8	14	0.000221307
chr10	118398900	118399426	7	8	0.00262816
chr10	119853925	119855501	8	24	0.000221307
chr10	120262425	120263101	10	15	9.67541e-07
chr11	5291000	5291926	8	16	0.000221307
chr11	10988025	10988526	7	8	0.00262816
chr11	11767950	11768676	8	13	0.000221307
chr11	11840900	11841851	8	14	0.000221307
chr11	12267450	12268076	12	14	2.57318e-09
chr11	12276675	12277051	7	8	0.00262816
chr11	14081875	14082826	10	15	9.67541e-07
chr11	17360275	17361276	7	15	0.00262816
chr11	18063625	18064726	8	16	0.000221307
chr11	18071200	18071676	7	7	0.00262816
chr11	18816575	18817351	12	17	2.57318e-09
chr11	20555675	20556551	13	18	1.15182e-10
chr11	20563525	20564051	8	10	0.000221307
chr11	21917425	21918151	12	16	2.57318e-09
chr11	21934600	21935201	8	11	0.000221307
chr11	22247875	22249076	9	22	1.57601e-05
chr11	22272625	22273101	7	8	0.00262816
chr11	23979350	23980051	7	12	0.00262816
chr11	23995675	23996201	11	12	5.24115e-08
chr11	24230450	24231101	12	15	2.57318e-09
chr11	24270150	24271026	8	15	0.000221307
chr11	24271125	24271726	10	13	9.67541e-07
chr11	26706525	26707201	7	10	0.00262816
chr11	28592825	28593976	12	21	2.57318e-09
chr11	29674100	29674626	7	8	0.00262816
chr11	31927450	31928426	8	14	0.000221307
chr11	32012850	32013751	17	28	<1.0E-10
chr11	32041675	32042401	10	14	9.67541e-07
chr11	32057500	32058726	10	24	9.67541e-07
chr11	34316100	34316651	9	11	1.57601e-05
chr11	35669750	35670751	13	19	1.15182e-10
chr11	35726775	35727501	11	14	5.24115e-08
chr11	35867375	35868501	21	33	<1.0E-10
chr11	36510200	36511226	8	21	0.000221307
chr11	36715625	36716101	9	10	1.57601e-05
chr11	36967300	36967676	7	7	0.00262816
chr11	39737550	39737976	7	7	0.00262816
chr11	40269775	40270526	10	14	9.67541e-07
chr11	40323900	40324851	7	13	0.00262816
chr11	40387025	40387501	7	8	0.00262816
chr11	40437475	40438576	15	23	<1.0E-10
chr11	40508075	40508726	7	9	0.00262816
chr11	47454075	47454576	8	9	0.000221307
chr11	54567625	54568876	10	22	9.67541e-07
chr11	56060250	56061001	7	11	0.00262816
chr11	61943650	61944701	7	14	0.00262816
chr11	63059825	63060326	10	12	9.67541e-07
chr11	63113200	63114076	8	13	0.000221307
chr11	63864425	63865301	8	13	0.000221307
chr11	64091725	64092251	8	10	0.000221307
chr11	64214125	64214501	7	7	0.00262816
chr11	65690750	65691401	7	12	0.00262816
chr11	66831200	66831676	7	9	0.00262816
chr11	66890850	66891301	7	8	0.00262816
chr11	67958875	67959901	10	17	9.67541e-07
chr11	67964350	67965101	11	14	5.24115e-08
chr11	68028575	68029351	9	12	1.57601e-05
chr11	69843150	69843776	8	13	0.000221307
chr11	71228100	71228801	7	11	0.00262816
chr11	71253400	71253826	9	10	1.57601e-05
chr11	71571800	71572626	9	13	1.57601e-05
chr11	74344700	74345276	7	9	0.00262816
chr11	76460450	76460901	7	8	0.00262816
chr11	77707300	77708351	9	16	1.57601e-05
chr11	77743650	77744176	7	9	0.00262816
chr11	77761275	77761751	8	9	0.000221307
chr11	77778225	77779376	9	21	1.57601e-05
chr11	78700625	78701401	7	11	0.00262816
chr11	80105750	80106326	7	10	0.00262816
chr11	80129075	80129926	7	12	0.00262816
chr11	80149050	80149976	8	16	0.000221307
chr11	80317550	80318276	12	20	2.57318e-09
chr11	80321900	80322676	7	11	0.00262816
chr11	80331850	80332651	9	15	1.57601e-05
chr11	80391225	80392151	9	16	1.57601e-05
chr11	81426400	81427201	9	19	1.57601e-05
chr11	81673850	81674501	7	9	0.00262816
chr11	82676400	82677651	7	20	0.00262816
chr11	83856575	83857651	9	17	1.57601e-05
chr11	84384000	84384401	7	7	0.00262816
chr11	85528125	85528576	8	8	0.000221307
chr11	85852450	85853251	9	16	1.57601e-05
chr11	86383500	86384301	7	12	0.00262816
chr11	87240050	87240426	7	8	0.00262816
chr11	87630350	87630726	7	7	0.00262816
chr11	87932800	87933276	10	11	9.67541e-07
chr11	87952500	87953226	11	14	5.24115e-08
chr11	88047225	88048251	7	13	0.00262816
chr11	88054150	88055076	7	14	0.00262816
chr11	88170325	88170901	8	10	0.000221307
chr11	88268500	88269051	12	13	2.57318e-09
chr11	88294900	88296251	10	24	9.67541e-07
chr11	88398550	88399276	12	16	2.57318e-09
chr11	88491050	88491726	7	10	0.00262816
chr11	88563500	88564601	7	13	0.00262816
chr11	89243050	89244226	7	17	0.00262816
chr11	89485000	89486226	9	18	1.57601e-05
chr11	89626650	89627576	8	13	0.000221307
chr11	90409700	90410201	14	15	<1.0E-10
chr11	94021375	94022051	10	14	9.67541e-07
chr11	96736750	96738276	12	30	2.57318e-09
chr11	96746775	96747676	15	25	<1.0E-10
chr11	98803200	98803851	7	11	0.00262816
chr11	101338775	101339676	14	24	<1.0E-10
chr11	101557125	101558101	8	19	0.000221307
chr11	101871175	101872001	8	12	0.000221307
chr11	103702150	103703326	7	16	0.00262816
chr11	107274375	107275551	8	17	0.000221307
chr11	107277775	107278301	10	12	9.67541e-07
chr11	107653425	107653901	7	7	0.00262816
chr11	108023350	108023951	8	10	0.000221307
chr11	108466425	108467351	9	15	1.57601e-05
chr11	108746850	108747526	8	12	0.000221307
chr11	108968075	108968626	7	9	0.00262816
chr11	109763600	109764801	8	16	0.000221307
chr11	110340125	110340801	7	11	0.00262816
chr11	111755275	111755826	7	9	0.00262816
chr11	112058825	112059751	18	29	<1.0E-10
chr11	112838175	112838701	12	14	2.57318e-09
chr11	113049350	113050251	7	14	0.00262816
chr11	113073675	113074401	10	13	9.67541e-07
chr11	113170525	113171076	7	8	0.00262816
chr11	113300525	113301626	10	23	9.67541e-07
chr11	113445075	113445826	8	12	0.000221307
chr11	113645725	113647701	12	40	2.57318e-09
chr11	114328925	114330026	11	24	5.24115e-08
chr11	114656075	114657751	16	42	<1.0E-10
chr11	115270800	115271351	11	13	5.24115e-08
chr11	117339800	117340676	7	11	0.00262816
chr11	117800800	117801826	9	19	1.57601e-05
chr11	118059050	118059926	9	16	1.57601e-05
chr11	120694875	120695526	7	9	0.00262816
chr12	5246500	5246926	7	8	0.00262816
chr12	5275025	5275551	7	8	0.00262816
chr12	6456250	6456701	7	8	0.00262816
chr12	6629225	6630026	12	21	2.57318e-09
chr12	6645400	6645951	7	9	0.00262816
chr12	10881575	10882451	7	12	0.00262816
chr12	11228225	11228751	7	9	0.00262816
chr12	12534525	12535826	8	23	0.000221307
chr12	12745600	12746451	11	18	5.24115e-08
chr12	12760550	12761526	9	16	1.57601e-05
chr12	12883975	12884901	9	15	1.57601e-05
chr12	13990800	13991376	10	12	9.67541e-07
chr12	14095725	14096201	7	8	0.00262816
chr12	15572775	15573501	8	12	0.000221307
chr12	17564650	17565276	7	10	0.00262816
chr12	25809275	25810051	16	25	<1.0E-10
chr12	26387775	26388201	8	9	0.000221307
chr12	27173200	27173676	7	7	0.00262816
chr12	27505825	27507101	11	21	5.24115e-08
chr12	27566900	27567276	7	7	0.00262816
chr12	27615125	27615901	7	13	0.00262816
chr12	27746875	27747576	8	13	0.000221307
chr12	27749500	27750376	12	17	2.57318e-09
chr12	27760900	27761626	13	18	1.15182e-10
chr12	27767625	27768326	7	12	0.00262816
chr12	27824900	27825626	8	13	0.000221307
chr12	27835575	27836726	12	24	2.57318e-09
chr12	28250750	28251601	12	24	2.57318e-09
chr12	28260250	28261526	13	28	1.15182e-10
chr12	28331325	28332276	11	21	5.24115e-08
chr12	29116975	29117601	7	10	0.00262816
chr12	29502000	29503151	25	44	<1.0E-10
chr12	32915425	32915976	7	9	0.00262816
chr12	39030400	39031301	7	12	0.00262816
chr12	39753650	39754176	7	9	0.00262816
chr12	39946850	39947351	7	8	0.00262816
chr12	40027850	40028726	10	20	9.67541e-07
chr12	40253575	40254501	11	17	5.24115e-08
chr12	40441725	40442201	7	7	0.00262816
chr12	40682575	40683626	8	16	0.000221307
chr12	41073650	41074076	8	8	0.000221307
chr12	45438950	45439626	17	20	<1.0E-10
chr12	45504575	45505376	18	26	<1.0E-10
chr12	45940800	45941276	7	7	0.00262816
chr12	51046050	51046751	8	12	0.000221307
chr12	51075300	51076126	11	16	5.24115e-08
chr12	51221075	51222476	40	85	<1.0E-10
chr12	51222550	51223701	15	33	<1.0E-10
chr12	51799575	51800451	9	13	1.57601e-05
chr12	51952575	51953101	7	8	0.00262816
chr12	52102525	52103976	24	49	<1.0E-10
chr12	53239200	53239801	11	14	5.24115e-08
chr12	53936100	53936851	8	11	0.000221307
chr12	54133725	54134251	12	13	2.57318e-09
chr12	54134300	54135101	7	12	0.00262816
chr12	54163850	54165001	8	15	0.000221307
chr12	54165475	54166876	9	21	1.57601e-05
chr12	54225200	54226151	10	16	9.67541e-07
chr12	54393400	54394376	10	23	9.67541e-07
chr12	54724675	54725526	9	14	1.57601e-05
chr12	57027375	57028651	8	18	0.000221307
chr12	57084075	57084876	10	14	9.67541e-07
chr12	57105275	57105901	10	13	9.67541e-07
chr12	57559650	57560276	11	13	5.24115e-08
chr12	58501825	58502876	8	17	0.000221307
chr12	59651925	59652776	8	16	0.000221307
chr12	73538925	73539326	7	7	0.00262816
chr12	76974025	76975576	14	30	<1.0E-10
chr12	78101600	78102151	7	8	0.00262816
chr12	78953175	78953976	14	20	<1.0E-10
chr12	80636200	80637126	15	26	<1.0E-10
chr12	80710350	80710901	10	12	9.67541e-07
chr12	80816100	80816926	7	11	0.00262816
chr12	80819950	80820726	16	21	<1.0E-10
chr12	80980600	80981051	9	10	1.57601e-05
chr12	81011675	81012726	11	19	5.24115e-08
chr12	81163075	81164626	10	27	9.67541e-07
chr12	82103600	82104751	9	20	1.57601e-05
chr12	84145350	84145976	9	12	1.57601e-05
chr12	85872850	85873876	16	25	<1.0E-10
chr12	85930700	85931601	10	16	9.67541e-07
chr12	86622000	86622676	8	12	0.000221307
chr12	86796025	86796851	14	19	<1.0E-10
chr12	87412300	87412801	11	12	5.24115e-08
chr12	88148050	88148626	7	9	0.00262816
chr12	88165125	88165676	12	13	2.57318e-09
chr12	88237175	88237801	7	10	0.00262816
chr12	90022550	90023226	9	13	1.57601e-05
chr12	90039375	90040351	13	26	1.15182e-10
chr12	90097950	90099251	14	28	<1.0E-10
chr12	90387400	90388176	8	13	0.000221307
chr12	90680575	90681526	9	16	1.57601e-05
chr12	90769125	90769776	9	12	1.57601e-05
chr12	91370600	91371726	18	37	<1.0E-10
chr12	93531050	93532426	17	38	<1.0E-10
chr12	95089725	95090526	9	15	1.57601e-05
chr12	95286050	95286826	7	12	0.00262816
chr12	97198475	97199176	9	14	1.57601e-05
chr12	98299675	98300101	7	8	0.00262816
chr12	99800175	99801601	15	37	<1.0E-10
chr12	100249150	100250101	10	16	9.67541e-07
chr12	100458250	100459351	33	56	<1.0E-10
chr12	100577850	100578726	31	39	<1.0E-10
chr12	100579625	100580101	7	8	0.00262816
chr12	100644425	100645101	15	20	<1.0E-10
chr12	104551925	104553326	11	24	5.24115e-08
chr12	105969625	105970326	7	10	0.00262816
chr12	107136775	107137701	16	24	<1.0E-10
chr12	108323375	108323951	11	14	5.24115e-08
chr12	108754650	108755501	7	12	0.00262816
chr12	109558675	109559276	9	12	1.57601e-05
chr12	109784750	109785351	8	10	0.000221307
chr12	110796525	110797426	9	19	1.57601e-05
chr12	112402425	112403351	11	17	5.24115e-08
chr12	112931750	112933126	14	28	<1.0E-10
chr12	113571050	113571951	10	19	9.67541e-07
chr12	113572000	113573126	7	18	0.00262816
chr12	113789725	113790476	7	10	0.00262816
chr12	118158125	118158826	7	11	0.00262816
chr12	118176375	118177276	7	13	0.00262816
chr12	118291850	118293476	11	34	5.24115e-08
chr12	118345575	118346151	7	10	0.00262816
chr12	118398150	118398851	7	11	0.00262816
chr12	118411350	118411901	14	15	<1.0E-10
chr12	118495575	118496601	8	19	0.000221307
chr12	119044275	119045376	7	14	0.00262816
chr12	119227625	119228226	10	13	9.67541e-07
chr12	119958200	119959326	9	22	1.57601e-05
chr12	120702825	120703251	7	8	0.00262816
chr13	6249775	6251026	11	22	5.24115e-08
chr13	6990625	6991451	7	13	0.00262816
chr13	7413625	7414351	7	12	0.00262816
chr13	9795525	9796201	8	12	0.000221307
chr13	12651300	12652201	7	11	0.00262816
chr13	15635500	15636726	8	25	0.000221307
chr13	15641250	15642501	7	19	0.00262816
chr13	15805650	15807276	12	29	2.57318e-09
chr13	17787525	17788076	7	9	0.00262816
chr13	20208875	20209726	8	12	0.000221307
chr13	20446025	20447026	11	18	5.24115e-08
chr13	24748850	24749401	12	14	2.57318e-09
chr13	24778900	24779526	8	10	0.000221307
chr13	25278675	25279101	7	7	0.00262816
chr13	25484750	25485551	12	16	2.57318e-09
chr13	25495000	25495401	7	8	0.00262816
chr13	25842375	25843801	12	29	2.57318e-09
chr13	26246400	26247526	21	37	<1.0E-10
chr13	28386575	28387576	7	15	0.00262816
chr13	28507600	28509376	29	58	<1.0E-10
chr13	28573050	28573626	8	11	0.000221307
chr13	28756350	28756926	10	12	9.67541e-07
chr13	28782125	28782826	13	16	1.15182e-10
chr13	28809975	28810976	8	19	0.000221307
chr13	28902375	28903926	9	33	1.57601e-05
chr13	29050725	29051301	7	9	0.00262816
chr13	29462600	29463626	8	18	0.000221307
chr13	29701750	29703326	23	50	<1.0E-10
chr13	34224300	34226301	9	32	1.57601e-05
chr13	34340300	34341201	15	22	<1.0E-10
chr13	34379250	34380201	8	17	0.000221307
chr13	34906000	34906826	8	14	0.000221307
chr13	36374075	36376401	21	80	<1.0E-10
chr13	37609000	37609751	7	11	0.00262816
chr13	39615175	39616426	13	29	1.15182e-10
chr13	39972925	39974001	8	17	0.000221307
chr13	41946200	41946801	7	10	0.00262816
chr13	42751950	42752601	9	14	1.57601e-05
chr13	43626025	43626951	26	39	<1.0E-10
chr13	44031475	44032451	7	14	0.00262816
chr13	44045550	44046076	8	10	0.000221307
chr13	44195775	44196851	8	19	0.000221307
chr13	44846675	44847576	10	18	9.67541e-07
chr13	44986800	44988251	22	38	<1.0E-10
chr13	45511625	45512351	9	12	1.57601e-05
chr13	45517625	45518226	7	10	0.00262816
chr13	45901025	45902026	8	16	0.000221307
chr13	46364325	46364901	13	16	1.15182e-10
chr13	46629475	46630401	8	16	0.000221307
chr13	47372975	47373526	11	12	5.24115e-08
chr13	47463450	47464151	7	10	0.00262816
chr13	47493125	47494301	17	31	<1.0E-10
chr13	48108250	48109051	10	15	9.67541e-07
chr13	48189475	48190476	9	22	1.57601e-05
chr13	48225925	48226551	8	11	0.000221307
chr13	48254300	48255401	12	21	2.57318e-09
chr13	48478975	48479901	11	22	5.24115e-08
chr13	48661375	48662201	8	14	0.000221307
chr13	51324200	51325101	8	12	0.000221307
chr13	51664775	51665376	7	10	0.00262816
chr13	51698525	51699151	11	14	5.24115e-08
chr13	51941100	51942176	8	17	0.000221307
chr13	51944075	51945201	7	16	0.00262816
chr13	52014000	52015476	8	24	0.000221307
chr13	52015775	52016726	30	54	<1.0E-10
chr13	52022025	52022426	7	7	0.00262816
chr13	52564925	52565676	9	13	1.57601e-05
chr13	54361725	54362226	9	9	1.57601e-05
chr13	54513250	54514001	7	12	0.00262816
chr13	56309425	56310401	10	20	9.67541e-07
chr13	56683425	56684551	19	28	<1.0E-10
chr13	57704475	57705276	9	13	1.57601e-05
chr13	59025800	59026276	9	9	1.57601e-05
chr13	59065900	59066951	7	14	0.00262816
chr13	59072600	59073801	10	19	9.67541e-07
chr13	59142350	59143226	11	15	5.24115e-08
chr13	59192750	59194001	17	31	<1.0E-10
chr13	59249300	59249801	8	9	0.000221307
chr13	60011500	60012301	7	10	0.00262816
chr13	60072300	60074026	9	29	1.57601e-05
chr13	60146725	60147551	7	13	0.00262816
chr13	60211600	60212326	8	11	0.000221307
chr13	60257750	60258301	7	9	0.00262816
chr13	63655475	63656876	24	38	<1.0E-10
chr13	63663675	63664776	7	14	0.00262816
chr13	63667675	63668176	7	8	0.00262816
chr13	63728225	63729126	13	18	1.15182e-10
chr13	64086450	64087601	14	22	<1.0E-10
chr13	64182300	64183026	7	10	0.00262816
chr13	67965650	67966576	10	17	9.67541e-07
chr13	69856925	69857301	8	8	0.000221307
chr13	70123075	70123751	7	11	0.00262816
chr13	70235225	70235851	8	11	0.000221307
chr13	71287475	71288651	10	18	9.67541e-07
chr13	73171825	73172701	12	17	2.57318e-09
chr13	74162525	74163126	9	13	1.57601e-05
chr13	77527200	77527751	8	9	0.000221307
chr13	77687275	77688001	9	14	1.57601e-05
chr13	78007525	78008201	7	10	0.00262816
chr13	78031375	78034076	19	58	<1.0E-10
chr13	78339475	78340151	8	11	0.000221307
chr13	78347175	78347651	7	8	0.00262816
chr13	78584900	78585526	9	12	1.57601e-05
chr13	78720175	78721201	8	19	0.000221307
chr13	78857075	78857626	8	10	0.000221307
chr13	79527125	79527676	7	7	0.00262816
chr13	79812400	79812951	8	10	0.000221307
chr13	81023775	81026001	9	34	1.57601e-05
chr13	81768400	81768826	7	8	0.00262816
chr13	81795575	81796401	8	13	0.000221307
chr13	83705200	83705651	7	8	0.00262816
chr13	83871725	83872351	7	11	0.00262816
chr13	83878700	83879576	12	19	2.57318e-09
chr13	83881175	83882051	8	15	0.000221307
chr13	84007200	84008101	8	14	0.000221307
chr13	84019875	84020751	11	20	5.24115e-08
chr13	84024175	84025301	9	19	1.57601e-05
chr13	84196575	84197101	11	13	5.24115e-08
chr13	84198725	84199726	18	33	<1.0E-10
chr13	84486875	84488601	8	26	0.000221307
chr13	84588025	84589151	9	18	1.57601e-05
chr13	84710475	84711751	44	66	<1.0E-10
chr13	84778450	84779651	11	26	5.24115e-08
chr13	84890875	84892176	12	24	2.57318e-09
chr13	85266300	85267226	7	13	0.00262816
chr13	90782650	90783701	8	16	0.000221307
chr13	91318175	91319076	13	19	1.15182e-10
chr13	91510450	91511151	8	11	0.000221307
chr13	91600175	91600726	8	8	0.000221307
chr13	94608700	94609651	8	14	0.000221307
chr13	95345625	95346326	8	13	0.000221307
chr13	96304050	96304651	9	12	1.57601e-05
chr13	96409350	96410376	9	15	1.57601e-05
chr13	96764900	96765476	7	10	0.00262816
chr13	98010425	98010901	8	9	0.000221307
chr13	98020200	98020701	7	9	0.00262816
chr13	98020750	98021426	7	10	0.00262816
chr13	98022150	98023301	21	36	<1.0E-10
chr13	98025950	98027101	8	21	0.000221307
chr13	98061575	98063401	13	38	1.15182e-10
chr13	98516850	98517926	11	23	5.24115e-08
chr13	98593825	98594951	8	16	0.000221307
chr13	98729425	98729801	7	7	0.00262816
chr13	99153900	99154301	7	8	0.00262816
chr13	99303775	99304451	7	11	0.00262816
chr13	100213950	100214851	13	20	1.15182e-10
chr13	100239850	100240576	7	12	0.00262816
chr13	100262750	100263676	10	18	9.67541e-07
chr13	100271175	100271926	18	23	<1.0E-10
chr13	100446350	100446851	7	8	0.00262816
chr13	100560675	100561226	12	14	2.57318e-09
chr13	102571175	102571626	8	9	0.000221307
chr13	103274350	103275076	9	14	1.57601e-05
chr13	106046600	106047551	9	16	1.57601e-05
chr13	108037125	108037976	8	15	0.000221307
chr13	108331600	108332451	7	12	0.00262816
chr13	108621250	108622001	7	10	0.00262816
chr13	110612500	110614101	10	24	9.67541e-07
chr13	111328350	111328776	7	7	0.00262816
chr13	111393050	111393601	9	10	1.57601e-05
chr13	112780975	112781626	10	12	9.67541e-07
chr13	114524175	114525001	7	12	0.00262816
chr13	114669850	114670876	13	19	1.15182e-10
chr13	114707950	114708826	11	16	5.24115e-08
chr13	116463850	116464601	7	11	0.00262816
chr13	117304775	117305626	9	20	1.57601e-05
chr13	117365025	117365776	7	11	0.00262816
chr14	12793175	12793676	9	9	1.57601e-05
chr14	13169875	13171401	40	76	<1.0E-10
chr14	13220900	13222651	13	28	1.15182e-10
chr14	13225400	13226526	20	30	<1.0E-10
chr14	14602900	14603751	17	26	<1.0E-10
chr14	14896875	14897801	13	24	1.15182e-10
chr14	16810875	16811526	10	13	9.67541e-07
chr14	17032500	17034551	22	52	<1.0E-10
chr14	17565950	17566576	7	10	0.00262816
chr14	17655075	17655526	8	8	0.000221307
chr14	20644425	20645376	13	23	1.15182e-10
chr14	20805550	20806976	14	31	<1.0E-10
chr14	21044650	21045351	7	9	0.00262816
chr14	22070900	22072401	25	53	<1.0E-10
chr14	22187425	22188651	7	16	0.00262816
chr14	22229850	22230851	9	18	1.57601e-05
chr14	23499175	23499801	8	12	0.000221307
chr14	23529050	23530051	10	17	9.67541e-07
chr14	23564800	23565851	12	22	2.57318e-09
chr14	23632350	23633301	8	14	0.000221307
chr14	25369950	25370776	10	14	9.67541e-07
chr14	25397600	25398251	7	10	0.00262816
chr14	25436400	25437401	9	17	1.57601e-05
chr14	25661075	25661801	8	11	0.000221307
chr14	25927750	25929051	8	19	0.000221307
chr14	26136725	26138176	25	48	<1.0E-10
chr14	27899000	27899401	12	12	2.57318e-09
chr14	29263575	29264601	10	17	9.67541e-07
chr14	29771750	29772251	10	11	9.67541e-07
chr14	32482825	32483326	7	9	0.00262816
chr14	32747525	32748301	7	11	0.00262816
chr14	35925825	35926576	10	18	9.67541e-07
chr14	36660125	36660526	7	7	0.00262816
chr14	49132275	49133701	11	27	5.24115e-08
chr14	49329525	49329976	7	8	0.00262816
chr14	49419250	49419926	9	13	1.57601e-05
chr14	49707825	49708626	8	15	0.000221307
chr14	52629950	52630926	7	15	0.00262816
chr14	55095300	55095701	8	8	0.000221307
chr14	55671150	55671801	7	9	0.00262816
chr14	57506800	57507276	7	8	0.00262816
chr14	60355450	60357126	21	51	<1.0E-10
chr14	60437975	60438801	7	11	0.00262816
chr14	60588525	60589126	11	13	5.24115e-08
chr14	61028400	61029201	10	21	9.67541e-07
chr14	61064775	61065201	8	8	0.000221307
chr14	61623750	61624526	7	11	0.00262816
chr14	61662125	61663251	11	21	5.24115e-08
chr14	63007650	63008601	9	14	1.57601e-05
chr14	63204300	63204801	7	8	0.00262816
chr14	63498800	63499476	7	10	0.00262816
chr14	64204600	64205676	7	14	0.00262816
chr14	64874875	64875951	11	22	5.24115e-08
chr14	65864225	65865001	9	14	1.57601e-05
chr14	67112925	67114126	15	25	<1.0E-10
chr14	67860800	67861376	12	15	2.57318e-09
chr14	68169250	68169701	8	9	0.000221307
chr14	68658375	68659176	9	13	1.57601e-05
chr14	69599400	69599826	7	7	0.00262816
chr14	70416575	70417276	7	11	0.00262816
chr14	75635675	75636701	13	25	1.15182e-10
chr14	75872900	75873526	9	14	1.57601e-05
chr14	76432300	76433376	7	18	0.00262816
chr14	76621325	76622251	11	21	5.24115e-08
chr14	76654375	76655326	9	15	1.57601e-05
chr14	76731400	76732176	8	15	0.000221307
chr14	76905400	76905851	9	10	1.57601e-05
chr14	77282500	77283026	9	11	1.57601e-05
chr14	77805700	77806701	9	20	1.57601e-05
chr14	77993175	77993876	11	16	5.24115e-08
chr14	78532225	78532826	7	10	0.00262816
chr14	78687950	78689251	17	33	<1.0E-10
chr14	79602975	79604151	14	28	<1.0E-10
chr14	80572275	80573451	13	25	1.15182e-10
chr14	87148650	87149076	9	9	1.57601e-05
chr14	89462575	89463251	11	16	5.24115e-08
chr14	89542775	89543601	15	19	<1.0E-10
chr14	93408275	93408876	9	11	1.57601e-05
chr14	93466100	93466626	12	12	2.57318e-09
chr14	97987250	97987851	10	15	9.67541e-07
chr14	98471700	98473026	16	41	<1.0E-10
chr14	98507875	98508376	7	9	0.00262816
chr14	98522025	98522451	7	7	0.00262816
chr14	98572975	98573501	8	9	0.000221307
chr14	100002300	100003001	8	12	0.000221307
chr14	100858150	100858876	13	17	1.15182e-10
chr14	104162675	104163851	12	27	2.57318e-09
chr14	104177450	104178151	7	11	0.00262816
chr14	104696750	104697651	8	14	0.000221307
chr14	105882000	105883176	27	39	<1.0E-10
chr14	106250400	106251001	7	11	0.00262816
chr14	114986900	114987301	7	8	0.00262816
chr14	116178525	116179276	7	13	0.00262816
chr14	117955550	117956301	7	10	0.00262816
chr14	118450950	118452026	8	16	0.000221307
chr14	118628950	118630526	63	136	<1.0E-10
chr14	118765525	118766126	7	9	0.00262816
chr14	118815150	118815901	11	15	5.24115e-08
chr14	118965375	118966201	11	16	5.24115e-08
chr14	119134225	119134826	8	10	0.000221307
chr14	120130775	120131276	7	7	0.00262816
chr14	122801725	122802601	7	12	0.00262816
chr14	122852725	122853526	10	16	9.67541e-07
chr14	123120300	123120676	7	8	0.00262816
chr14	123270900	123271551	9	12	1.57601e-05
chr14	123464200	123465476	20	42	<1.0E-10
chr14	123912475	123913201	10	15	9.67541e-07
chr15	8609625	8610376	9	12	1.57601e-05
chr15	8666900	8667551	7	10	0.00262816
chr15	8815200	8815901	12	17	2.57318e-09
chr15	10584525	10585876	11	30	5.24115e-08
chr15	13322625	13323926	23	42	<1.0E-10
chr15	25681975	25682801	15	24	<1.0E-10
chr15	25683650	25684826	7	17	0.00262816
chr15	25690775	25692776	13	45	1.15182e-10
chr15	25703600	25704151	10	12	9.67541e-07
chr15	29367475	29368076	9	12	1.57601e-05
chr15	31331875	31332476	7	11	0.00262816
chr15	31828775	31829526	8	12	0.000221307
chr15	32102425	32102901	7	8	0.00262816
chr15	37527175	37527851	7	11	0.00262816
chr15	40900200	40900626	7	7	0.00262816
chr15	42439200	42440251	12	20	2.57318e-09
chr15	52244725	52245351	9	12	1.57601e-05
chr15	53142375	53142876	8	9	0.000221307
chr15	56807250	56807751	9	10	1.57601e-05
chr15	58807700	58808501	7	11	0.00262816
chr15	58871950	58873126	8	24	0.000221307
chr15	58985000	58985926	7	13	0.00262816
chr15	62734600	62735101	8	9	0.000221307
chr15	63600500	63600926	7	8	0.00262816
chr15	65765600	65765876	10	10	9.67541e-07
chr15	67076625	67077676	19	35	<1.0E-10
chr15	72851550	72852051	10	11	9.67541e-07
chr15	74024725	74025376	8	11	0.000221307
chr15	75445750	75446426	10	14	9.67541e-07
chr15	78513825	78514401	7	9	0.00262816
chr15	78601025	78602001	10	17	9.67541e-07
chr15	80628700	80630101	8	20	0.000221307
chr15	80652725	80653076	7	7	0.00262816
chr15	81366375	81366851	7	9	0.00262816
chr15	83595975	83596601	7	10	0.00262816
chr15	84872275	84873751	8	20	0.000221307
chr15	85288700	85289801	9	21	1.57601e-05
chr15	85291800	85292501	11	16	5.24115e-08
chr15	85293500	85294051	7	9	0.00262816
chr15	85294175	85295351	8	17	0.000221307
chr15	86107050	86108101	9	17	1.57601e-05
chr15	88808725	88809776	10	19	9.67541e-07
chr15	90231200	90231951	8	14	0.000221307
chr15	90847825	90849926	11	32	5.24115e-08
chr15	90886400	90886976	12	14	2.57318e-09
chr15	90908200	90908801	7	11	0.00262816
chr15	92470650	92471226	8	11	0.000221307
chr15	94309200	94309576	7	7	0.00262816
chr15	98799100	98799976	11	17	5.24115e-08
chr15	98817325	98817726	8	8	0.000221307
chr15	99637900	99639276	21	39	<1.0E-10
chr15	99690050	99690601	7	9	0.00262816
chr15	101837950	101838601	9	12	1.57601e-05
chr15	103045375	103046376	8	18	0.000221307
chr16	6962075	6962601	11	12	5.24115e-08
chr16	6964725	6965526	10	15	9.67541e-07
chr16	7052450	7053201	13	16	1.15182e-10
chr16	7373950	7375176	7	18	0.00262816
chr16	12901750	12902351	11	14	5.24115e-08
chr16	15052975	15053551	9	11	1.57601e-05
chr16	16559725	16560776	10	22	9.67541e-07
chr16	18119100	18119526	7	8	0.00262816
chr16	18235175	18235801	8	11	0.000221307
chr16	18380175	18381026	12	18	2.57318e-09
chr16	21339550	21340676	14	25	<1.0E-10
chr16	21664975	21665901	10	17	9.67541e-07
chr16	21869875	21870676	8	11	0.000221307
chr16	23504425	23505101	7	12	0.00262816
chr16	24941300	24942001	7	13	0.00262816
chr16	25016300	25016776	8	9	0.000221307
chr16	25058575	25060301	8	21	0.000221307
chr16	25448900	25449826	14	23	<1.0E-10
chr16	26060650	26061101	7	8	0.00262816
chr16	28238575	28239001	7	7	0.00262816
chr16	28851250	28852126	9	15	1.57601e-05
chr16	29720050	29720476	8	9	0.000221307
chr16	29883025	29884226	17	30	<1.0E-10
chr16	30129525	30130151	10	16	9.67541e-07
chr16	31592150	31593151	19	34	<1.0E-10
chr16	33216100	33217226	7	14	0.00262816
chr16	33584750	33585826	7	14	0.00262816
chr16	33605650	33607826	11	37	5.24115e-08
chr16	33734575	33735126	9	11	1.57601e-05
chr16	34561600	34562501	7	12	0.00262816
chr16	35564325	35565151	11	18	5.24115e-08
chr16	35592075	35593076	7	15	0.00262816
chr16	35729175	35729701	10	11	9.67541e-07
chr16	37584400	37584951	7	8	0.00262816
chr16	38701650	38702326	8	11	0.000221307
chr16	38941200	38941901	7	11	0.00262816
chr16	42269050	42269751	11	13	5.24115e-08
chr16	43286275	43287351	7	14	0.00262816
chr16	43603975	43605476	9	26	1.57601e-05
chr16	43799575	43801126	9	22	1.57601e-05
chr16	44394700	44395201	9	10	1.57601e-05
chr16	44530300	44531526	15	26	<1.0E-10
chr16	44687625	44688176	7	9	0.00262816
chr16	45724575	45725326	8	14	0.000221307
chr16	45841525	45841926	7	7	0.00262816
chr16	46291150	46292201	7	15	0.00262816
chr16	52601125	52601801	9	14	1.57601e-05
chr16	59604125	59604776	10	14	9.67541e-07
chr16	59853950	59854701	8	12	0.000221307
chr16	63091125	63092051	17	24	<1.0E-10
chr16	63500800	63501751	10	18	9.67541e-07
chr16	63805925	63807051	14	25	<1.0E-10
chr16	64068500	64069751	16	34	<1.0E-10
chr16	67611175	67611901	9	13	1.57601e-05
chr16	70147725	70148351	9	13	1.57601e-05
chr16	70725050	70725976	9	15	1.57601e-05
chr16	71267350	71267851	7	8	0.00262816
chr16	72510575	72511551	7	15	0.00262816
chr16	72610850	72611426	7	10	0.00262816
chr16	72699325	72700001	8	12	0.000221307
chr16	72887900	72888751	8	14	0.000221307
chr16	76319350	76320951	13	42	1.15182e-10
chr16	77236250	77238801	12	47	2.57318e-09
chr16	77291825	77293101	16	34	<1.0E-10
chr16	77301225	77302026	8	15	0.000221307
chr16	77399925	77401251	20	34	<1.0E-10
chr16	77417900	77418326	9	10	1.57601e-05
chr16	77421750	77422676	17	30	<1.0E-10
chr16	77501100	77501626	8	10	0.000221307
chr16	77852575	77853176	9	12	1.57601e-05
chr16	78101850	78102476	11	14	5.24115e-08
chr16	79177500	79178101	9	12	1.57601e-05
chr16	81285350	81285826	8	10	0.000221307
chr16	84017175	84017451	8	8	0.000221307
chr16	85308175	85308651	11	12	5.24115e-08
chr16	86067875	86068826	7	11	0.00262816
chr16	90656550	90657276	8	11	0.000221307
chr16	91105425	91106201	9	16	1.57601e-05
chr16	91140225	91141576	16	30	<1.0E-10
chr16	91292575	91293526	15	25	<1.0E-10
chr16	92510725	92511101	7	7	0.00262816
chr16	94400650	94402126	7	20	0.00262816
chr16	94534425	94534901	7	8	0.00262816
chr16	95890100	95890526	10	11	9.67541e-07
chr16	97067500	97068076	7	9	0.00262816
chr17	5660200	5660901	8	13	0.000221307
chr17	9736275	9736876	16	19	<1.0E-10
chr17	9772500	9773426	8	17	0.000221307
chr17	9890725	9891126	7	8	0.00262816
chr17	9918550	9919226	7	10	0.00262816
chr17	10098000	10099626	7	26	0.00262816
chr17	10444275	10444876	7	10	0.00262816
chr17	10752750	10753576	9	13	1.57601e-05
chr17	10936925	10938426	17	37	<1.0E-10
chr17	11726650	11727126	7	9	0.00262816
chr17	15225650	15226176	7	9	0.00262816
chr17	15384500	15385676	13	22	1.15182e-10
chr17	15513700	15514576	9	16	1.57601e-05
chr17	15515550	15516451	11	22	5.24115e-08
chr17	15516750	15519051	13	43	1.15182e-10
chr17	15577250	15578251	20	32	<1.0E-10
chr17	16114400	16114776	7	7	0.00262816
chr17	16130525	16131476	16	31	<1.0E-10
chr17	17545750	17546901	10	21	9.67541e-07
chr17	17964125	17965801	10	27	9.67541e-07
chr17	25410500	25411101	7	9	0.00262816
chr17	25902725	25903376	7	10	0.00262816
chr17	26639850	26640326	8	8	0.000221307
chr17	27559475	27559951	8	9	0.000221307
chr17	27638275	27639376	11	22	5.24115e-08
chr17	28217275	28217876	8	10	0.000221307
chr17	30416425	30417226	17	24	<1.0E-10
chr17	30514650	30515901	24	47	<1.0E-10
chr17	30634300	30635326	11	19	5.24115e-08
chr17	30996550	30997626	9	16	1.57601e-05
chr17	31903575	31904051	7	7	0.00262816
chr17	32953075	32953851	14	20	<1.0E-10
chr17	34162375	34163451	7	15	0.00262816
chr17	35036850	35037351	8	10	0.000221307
chr17	35840600	35841876	13	27	1.15182e-10
chr17	37165575	37166201	7	10	0.00262816
chr17	43214075	43214626	7	8	0.00262816
chr17	49539350	49539726	7	7	0.00262816
chr17	49830125	49830901	7	11	0.00262816
chr17	50376175	50377076	8	14	0.000221307
chr17	56808225	56808701	7	8	0.00262816
chr17	56953050	56954301	8	19	0.000221307
chr17	59071450	59072676	11	25	5.24115e-08
chr17	62502050	62502351	7	7	0.00262816
chr17	63521075	63522151	19	37	<1.0E-10
chr17	64156875	64157726	16	24	<1.0E-10
chr17	66828675	66829876	8	19	0.000221307
chr17	71196850	71198201	7	19	0.00262816
chr17	76510975	76511376	9	10	1.57601e-05
chr17	78900300	78901151	9	16	1.57601e-05
chr17	81381325	81382001	9	13	1.57601e-05
chr17	84337675	84338426	8	12	0.000221307
chr17	84495525	84496201	10	14	9.67541e-07
chr17	85176025	85176376	7	7	0.00262816
chr17	85853950	85854726	8	12	0.000221307
chr17	88144650	88145101	10	11	9.67541e-07
chr17	89163025	89163801	12	18	2.57318e-09
chr17	90486150	90486701	8	9	0.000221307
chr17	91095500	91096726	15	31	<1.0E-10
chr17	91291575	91292276	13	19	1.15182e-10
chr17	93660125	93660726	8	10	0.000221307
chr18	5163000	5163876	8	13	0.000221307
chr18	5886025	5886551	7	9	0.00262816
chr18	8043875	8045276	35	61	<1.0E-10
chr18	8870925	8872151	16	33	<1.0E-10
chr18	9027175	9027776	7	9	0.00262816
chr18	9147450	9148101	8	12	0.000221307
chr18	9216000	9217476	7	21	0.00262816
chr18	10343600	10344426	9	13	1.57601e-05
chr18	10735600	10736326	9	15	1.57601e-05
chr18	12184250	12185351	7	18	0.00262816
chr18	12776600	12777251	7	12	0.00262816
chr18	14222350	14223126	10	15	9.67541e-07
chr18	14617725	14618226	8	10	0.000221307
chr18	16720075	16720776	10	13	9.67541e-07
chr18	16827625	16828826	8	15	0.000221307
chr18	16871700	16872451	11	18	5.24115e-08
chr18	17770800	17771476	11	17	5.24115e-08
chr18	17843525	17844151	7	10	0.00262816
chr18	21320400	21321051	7	9	0.00262816
chr18	21431275	21431826	8	9	0.000221307
chr18	21531050	21531401	7	8	0.00262816
chr18	23553200	23553951	7	12	0.00262816
chr18	26157275	26158301	9	16	1.57601e-05
chr18	28114800	28115801	15	23	<1.0E-10
chr18	29037025	29037426	7	8	0.00262816
chr18	33620600	33621876	8	18	0.000221307
chr18	33622675	33623601	7	13	0.00262816
chr18	33712000	33713576	37	71	<1.0E-10
chr18	34127500	34128751	11	23	5.24115e-08
chr18	35373625	35375226	9	23	1.57601e-05
chr18	35641650	35643201	17	32	<1.0E-10
chr18	36034450	36034976	8	9	0.000221307
chr18	37377150	37377976	7	12	0.00262816
chr18	38039550	38040051	11	12	5.24115e-08
chr18	38173825	38174276	7	7	0.00262816
chr18	38334875	38335401	7	9	0.00262816
chr18	38902100	38902701	8	11	0.000221307
chr18	46056175	46057226	7	14	0.00262816
chr18	46268875	46269651	7	11	0.00262816
chr18	47493075	47493676	7	10	0.00262816
chr18	47806975	47807676	9	11	1.57601e-05
chr18	47863225	47863876	7	9	0.00262816
chr18	48234000	48234876	8	16	0.000221307
chr18	50556650	50557376	11	14	5.24115e-08
chr18	52937425	52937951	7	8	0.00262816
chr18	54333950	54335326	9	20	1.57601e-05
chr18	54612025	54613626	13	28	1.15182e-10
chr18	54620500	54620951	9	9	1.57601e-05
chr18	54642000	54642626	7	9	0.00262816
chr18	54690400	54690951	7	9	0.00262816
chr18	54757950	54758751	7	12	0.00262816
chr18	54879000	54879801	7	14	0.00262816
chr18	54919950	54920976	9	18	1.57601e-05
chr18	55061250	55062126	8	13	0.000221307
chr18	55136050	55136826	8	13	0.000221307
chr18	55145200	55145976	9	15	1.57601e-05
chr18	55150200	55151276	19	38	<1.0E-10
chr18	55174975	55176251	14	30	<1.0E-10
chr18	55293300	55294026	8	14	0.000221307
chr18	55295750	55296826	19	36	<1.0E-10
chr18	55305650	55306951	8	18	0.000221307
chr18	55349225	55350701	16	31	<1.0E-10
chr18	55355625	55356701	11	27	5.24115e-08
chr18	55650475	55650826	7	7	0.00262816
chr18	55665650	55667076	18	34	<1.0E-10
chr18	55678700	55679726	14	22	<1.0E-10
chr18	55706750	55708001	7	21	0.00262816
chr18	55709025	55709801	15	23	<1.0E-10
chr18	55797950	55799051	12	22	2.57318e-09
chr18	55854675	55855701	11	19	5.24115e-08
chr18	55921150	55921651	7	8	0.00262816
chr18	55921725	55922451	9	13	1.57601e-05
chr18	55922775	55923876	10	23	9.67541e-07
chr18	55975625	55976701	11	26	5.24115e-08
chr18	56295800	56297076	10	22	9.67541e-07
chr18	56441650	56442576	7	13	0.00262816
chr18	57421725	57423176	9	26	1.57601e-05
chr18	57863150	57864451	10	26	9.67541e-07
chr18	57876825	57877426	7	10	0.00262816
chr18	62941325	62941976	7	10	0.00262816
chr18	64929725	64930151	7	8	0.00262816
chr18	65092850	65093501	8	12	0.000221307
chr18	65679825	65680851	7	15	0.00262816
chr18	65689800	65690926	18	31	<1.0E-10
chr18	65719350	65720251	11	19	5.24115e-08
chr18	65723325	65723926	7	9	0.00262816
chr18	65857100	65858126	7	14	0.00262816
chr18	66182100	66183926	13	42	1.15182e-10
chr18	67696000	67696701	7	12	0.00262816
chr18	68218725	68219326	9	11	1.57601e-05
chr18	69012200	69013251	7	14	0.00262816
chr18	69102325	69102851	8	10	0.000221307
chr18	69135825	69137201	13	25	1.15182e-10
chr18	69721825	69722851	11	20	5.24115e-08
chr18	69752125	69752951	15	24	<1.0E-10
chr18	69766975	69768176	8	16	0.000221307
chr18	71594400	71594676	7	7	0.00262816
chr18	71754700	71755501	7	12	0.00262816
chr18	72884425	72885601	25	40	<1.0E-10
chr18	72979975	72980601	7	10	0.00262816
chr18	73108875	73109576	10	16	9.67541e-07
chr18	73218900	73220426	7	20	0.00262816
chr18	74027025	74027551	7	8	0.00262816
chr18	74866325	74867226	8	14	0.000221307
chr18	75115800	75116926	9	16	1.57601e-05
chr18	75376400	75376826	10	11	9.67541e-07
chr18	76170425	76171076	7	11	0.00262816
chr18	76772250	76773101	7	12	0.00262816
chr18	78651575	78652926	29	58	<1.0E-10
chr18	78717375	78717801	8	8	0.000221307
chr18	79078900	79079776	8	13	0.000221307
chr18	79179175	79179976	7	11	0.00262816
chr18	79180425	79181001	9	11	1.57601e-05
chr18	79181100	79181976	8	13	0.000221307
chr18	79245525	79246401	9	16	1.57601e-05
chr18	79247550	79248376	10	17	9.67541e-07
chr18	81008175	81009226	7	14	0.00262816
chr18	81181275	81181851	7	10	0.00262816
chr18	81705950	81707151	7	15	0.00262816
chr18	82327225	82327651	7	8	0.00262816
chr18	83071250	83071751	8	10	0.000221307
chr18	84888425	84889076	8	10	0.000221307
chr18	86632250	86632726	8	8	0.000221307
chr18	88090900	88091826	12	17	2.57318e-09
chr18	88954450	88955401	12	17	2.57318e-09
chr18	89733375	89734151	13	17	1.15182e-10
chr19	5803500	5804176	8	13	0.000221307
chr19	7340075	7340776	8	12	0.000221307
chr19	7341575	7342426	9	15	1.57601e-05
chr19	7556150	7556726	7	9	0.00262816
chr19	9058825	9059276	7	7	0.00262816
chr19	12568150	12568601	7	7	0.00262816
chr19	14580775	14582226	17	38	<1.0E-10
chr19	14583325	14583751	7	8	0.00262816
chr19	14640375	14640801	7	7	0.00262816
chr19	14640950	14641626	8	14	0.000221307
chr19	14851525	14852251	14	18	<1.0E-10
chr19	14964975	14966526	9	26	1.57601e-05
chr19	15875900	15877026	7	17	0.00262816
chr19	15877325	15878451	13	24	1.15182e-10
chr19	15910750	15912726	14	40	<1.0E-10
chr19	16125225	16125651	7	8	0.00262816
chr19	16580650	16581551	8	15	0.000221307
chr19	18167075	18167376	7	7	0.00262816
chr19	18962925	18963876	10	17	9.67541e-07
chr19	19321350	19321901	7	9	0.00262816
chr19	21240050	21240876	7	11	0.00262816
chr19	21864075	21864801	7	11	0.00262816
chr19	22753700	22754226	8	9	0.000221307
chr19	22897925	22898751	13	21	1.15182e-10
chr19	23476125	23477001	8	13	0.000221307
chr19	24401150	24402151	8	16	0.000221307
chr19	24527700	24528326	12	15	2.57318e-09
chr19	25681975	25683026	12	20	2.57318e-09
chr19	26823000	26823526	7	8	0.00262816
chr19	26844525	26844976	7	8	0.00262816
chr19	26919775	26920501	7	13	0.00262816
chr19	27978850	27979901	17	26	<1.0E-10
chr19	28085375	28085901	7	9	0.00262816
chr19	28456250	28457026	7	12	0.00262816
chr19	30234225	30234826	11	14	5.24115e-08
chr19	36970675	36971951	11	25	5.24115e-08
chr19	37955900	37956601	8	12	0.000221307
chr19	38562350	38563076	7	11	0.00262816
chr19	40321850	40322226	8	8	0.000221307
chr19	40508575	40508976	7	7	0.00262816
chr19	41812500	41812976	7	8	0.00262816
chr19	44589000	44590076	15	29	<1.0E-10
chr19	45670550	45671426	7	14	0.00262816
chr19	47547500	47548301	10	13	9.67541e-07
chr19	48245500	48246326	8	13	0.000221307
chr19	53848725	53849226	8	9	0.000221307
chr19	53908350	53909076	7	11	0.00262816
chr19	53927200	53927976	9	15	1.57601e-05
chr19	55217925	55218801	7	13	0.00262816
chr19	55450875	55451351	7	8	0.00262816
chr19	55455225	55455901	7	11	0.00262816
chr19	55970925	55971801	10	16	9.67541e-07
chr19	56136450	56137476	13	21	1.15182e-10
chr19	56264625	56265076	7	8	0.00262816
chr19	57152650	57153151	7	8	0.00262816
chr19	58065850	58066401	7	8	0.00262816
chr19	58181850	58182376	7	9	0.00262816
chr19	58325525	58326126	7	10	0.00262816
chr19	59005600	59006076	7	8	0.00262816
chr19	59081150	59082001	7	12	0.00262816
chr19	59118425	59119601	9	18	1.57601e-05
chr19	59207725	59208401	10	14	9.67541e-07
chr19	59540125	59542101	7	28	0.00262816
chr19	59544875	59545426	7	8	0.00262816
chr19	59942375	59942776	9	10	1.57601e-05
chr19	59987375	59987976	11	13	5.24115e-08
chr19	60091525	60092176	11	14	5.24115e-08
chr2	4019975	4020676	7	11	0.00262816
chr2	4221450	4221876	7	7	0.00262816
chr2	4227950	4228476	7	9	0.00262816
chr2	5235550	5235976	8	9	0.000221307
chr2	5318975	5319601	8	12	0.000221307
chr2	6176500	6177126	7	10	0.00262816
chr2	6182175	6183076	9	15	1.57601e-05
chr2	6384725	6385901	9	17	1.57601e-05
chr2	6795950	6796751	7	11	0.00262816
chr2	6824250	6824926	7	11	0.00262816
chr2	7009775	7011026	7	16	0.00262816
chr2	7231650	7232301	19	22	<1.0E-10
chr2	10197775	10198276	8	10	0.000221307
chr2	13320000	13321051	11	18	5.24115e-08
chr2	13493800	13494151	7	7	0.00262816
chr2	15578025	15578526	7	9	0.00262816
chr2	17949100	17949676	7	10	0.00262816
chr2	17952150	17952626	8	9	0.000221307
chr2	17962925	17963576	7	10	0.00262816
chr2	17972450	17973776	10	21	9.67541e-07
chr2	18238525	18239126	8	11	0.000221307
chr2	20469525	20470301	7	11	0.00262816
chr2	20931550	20932826	7	17	0.00262816
chr2	20965200	20966276	11	19	5.24115e-08
chr2	21839450	21840776	7	18	0.00262816
chr2	21885600	21886201	14	16	<1.0E-10
chr2	22215125	22215876	20	27	<1.0E-10
chr2	24520125	24520801	8	12	0.000221307
chr2	24981125	24982351	16	37	<1.0E-10
chr2	26153900	26154751	7	14	0.00262816
chr2	26355875	26357926	15	47	<1.0E-10
chr2	26433925	26434451	7	8	0.00262816
chr2	27156775	27157176	8	9	0.000221307
chr2	27185850	27186376	7	8	0.00262816
chr2	27428100	27429126	14	31	<1.0E-10
chr2	28242950	28243376	8	8	0.000221307
chr2	28652925	28653851	11	16	5.24115e-08
chr2	28763175	28763751	8	10	0.000221307
chr2	28799175	28799976	7	11	0.00262816
chr2	29240700	29241301	8	11	0.000221307
chr2	29320325	29321301	11	18	5.24115e-08
chr2	30297100	30298126	8	14	0.000221307
chr2	30577350	30578676	9	21	1.57601e-05
chr2	31354925	31356301	9	19	1.57601e-05
chr2	33668400	33668976	10	12	9.67541e-07
chr2	33817400	33818451	7	15	0.00262816
chr2	37674275	37674726	7	8	0.00262816
chr2	37697375	37698401	7	15	0.00262816
chr2	37786175	37786801	7	11	0.00262816
chr2	37952950	37953476	7	9	0.00262816
chr2	37992525	37993076	8	10	0.000221307
chr2	37998950	38000401	13	27	1.15182e-10
chr2	38076525	38077276	9	15	1.57601e-05
chr2	38279675	38280576	9	15	1.57601e-05
chr2	38439650	38440976	12	21	2.57318e-09
chr2	38678550	38680026	10	26	9.67541e-07
chr2	41862400	41863626	7	16	0.00262816
chr2	43833925	43834801	9	17	1.57601e-05
chr2	44160000	44160551	7	8	0.00262816
chr2	44381875	44382301	7	8	0.00262816
chr2	44879350	44880501	8	22	0.000221307
chr2	44887375	44888226	12	20	2.57318e-09
chr2	44964425	44964851	7	8	0.00262816
chr2	45040125	45040801	7	10	0.00262816
chr2	45080800	45081701	10	19	9.67541e-07
chr2	48394125	48395126	12	23	2.57318e-09
chr2	49573900	49576076	9	34	1.57601e-05
chr2	49899725	49900901	7	18	0.00262816
chr2	50820825	50821551	9	15	1.57601e-05
chr2	50826550	50827326	18	25	<1.0E-10
chr2	50900925	50901626	9	13	1.57601e-05
chr2	50942850	50944001	12	24	2.57318e-09
chr2	50945400	50946226	10	15	9.67541e-07
chr2	52490875	52491451	7	9	0.00262816
chr2	53243525	53244401	11	21	5.24115e-08
chr2	54943825	54944301	7	7	0.00262816
chr2	57119775	57120376	7	10	0.00262816
chr2	57230325	57231151	7	13	0.00262816
chr2	57240200	57240751	7	9	0.00262816
chr2	57375100	57375976	7	12	0.00262816
chr2	58385700	58386701	8	14	0.000221307
chr2	60634750	60635476	8	16	0.000221307
chr2	61494025	61494876	7	14	0.00262816
chr2	62645350	62645976	16	21	<1.0E-10
chr2	62646600	62647501	7	13	0.00262816
chr2	62954825	62955826	8	14	0.000221307
chr2	63800825	63802226	9	25	1.57601e-05
chr2	68204850	68205251	7	8	0.00262816
chr2	68242550	68243251	11	16	5.24115e-08
chr2	69072975	69073776	9	13	1.57601e-05
chr2	69965525	69966051	8	10	0.000221307
chr2	70006600	70007026	10	11	9.67541e-07
chr2	70040275	70041401	7	16	0.00262816
chr2	70998225	70999126	7	12	0.00262816
chr2	71256725	71257401	8	13	0.000221307
chr2	71258275	71259501	14	25	<1.0E-10
chr2	71354825	71356151	8	23	0.000221307
chr2	71960450	71960976	7	9	0.00262816
chr2	72264575	72265901	23	37	<1.0E-10
chr2	72367550	72368276	7	10	0.00262816
chr2	72619700	72620151	8	10	0.000221307
chr2	74081525	74082201	7	10	0.00262816
chr2	74264550	74265776	11	23	5.24115e-08
chr2	74288425	74288976	8	10	0.000221307
chr2	79191800	79192276	7	8	0.00262816
chr2	79239350	79239826	9	10	1.57601e-05
chr2	79239875	79240476	8	11	0.000221307
chr2	79969600	79970051	10	10	9.67541e-07
chr2	80278900	80279601	8	12	0.000221307
chr2	91239225	91240426	10	22	9.67541e-07
chr2	91276950	91277651	7	9	0.00262816
chr2	93016675	93018076	14	32	<1.0E-10
chr2	93962850	93963251	9	9	1.57601e-05
chr2	95289000	95289626	7	9	0.00262816
chr2	97318275	97319526	10	23	9.67541e-07
chr2	97383800	97384526	8	12	0.000221307
chr2	101012800	101013401	7	10	0.00262816
chr2	101432475	101433376	8	14	0.000221307
chr2	101791175	101791601	9	9	1.57601e-05
chr2	101818275	101819901	12	38	2.57318e-09
chr2	101864450	101865251	10	15	9.67541e-07
chr2	101869625	101870226	7	9	0.00262816
chr2	103020375	103020926	8	10	0.000221307
chr2	104929925	104930776	7	12	0.00262816
chr2	105356300	105356926	9	12	1.57601e-05
chr2	105452175	105452726	13	15	1.15182e-10
chr2	105512900	105513676	8	14	0.000221307
chr2	105559100	105560676	8	24	0.000221307
chr2	105923850	105924376	8	10	0.000221307
chr2	106352675	106353701	8	13	0.000221307
chr2	106490100	106490801	7	10	0.00262816
chr2	106696650	106697101	7	8	0.00262816
chr2	109782450	109784051	7	21	0.00262816
chr2	109800050	109801301	17	28	<1.0E-10
chr2	114957650	114958826	16	30	<1.0E-10
chr2	115550875	115551851	14	22	<1.0E-10
chr2	115891625	115892251	9	11	1.57601e-05
chr2	116800100	116800726	7	10	0.00262816
chr2	116801000	116802426	7	20	0.00262816
chr2	117178075	117178526	7	7	0.00262816
chr2	117764050	117764951	10	15	9.67541e-07
chr2	118029450	118030376	7	16	0.00262816
chr2	118146100	118146651	7	9	0.00262816
chr2	125886275	125887251	7	15	0.00262816
chr2	126318475	126318976	8	9	0.000221307
chr2	128156875	128157326	7	8	0.00262816
chr2	131016100	131017301	8	15	0.000221307
chr2	132549575	132550126	7	8	0.00262816
chr2	132577150	132577826	7	9	0.00262816
chr2	134736575	134737001	7	7	0.00262816
chr2	134754875	134755551	8	11	0.000221307
chr2	136570625	136571026	10	11	9.67541e-07
chr2	136935700	136936726	7	17	0.00262816
chr2	137531775	137532826	12	25	2.57318e-09
chr2	137633950	137634701	8	15	0.000221307
chr2	140479125	140479676	9	11	1.57601e-05
chr2	140530975	140531501	10	12	9.67541e-07
chr2	141043550	141044051	8	9	0.000221307
chr2	141137800	141138301	7	8	0.00262816
chr2	142160625	142161801	10	27	9.67541e-07
chr2	142188250	142189101	9	17	1.57601e-05
chr2	145658175	145658826	10	13	9.67541e-07
chr2	145685675	145686126	7	9	0.00262816
chr2	145942975	145944051	7	15	0.00262816
chr2	146042600	146044001	8	22	0.000221307
chr2	146046175	146047076	7	12	0.00262816
chr2	146104375	146106001	8	23	0.000221307
chr2	146127450	146128676	8	18	0.000221307
chr2	146149975	146151601	12	28	2.57318e-09
chr2	146156400	146157151	7	13	0.00262816
chr2	146374600	146375326	11	17	5.24115e-08
chr2	146659025	146659651	7	9	0.00262816
chr2	146783925	146784601	10	16	9.67541e-07
chr2	146898950	146900001	7	13	0.00262816
chr2	148714725	148716476	9	31	1.57601e-05
chr2	151816525	151817276	8	15	0.000221307
chr2	151907050	151907426	7	8	0.00262816
chr2	152051400	152051976	7	10	0.00262816
chr2	154247025	154247751	12	19	2.57318e-09
chr2	154252275	154252976	8	11	0.000221307
chr2	154291625	154292301	17	23	<1.0E-10
chr2	154751075	154751601	9	10	1.57601e-05
chr2	157153775	157154901	9	20	1.57601e-05
chr2	157366750	157367326	8	10	0.000221307
chr2	157532550	157533076	7	9	0.00262816
chr2	160973875	160974326	7	8	0.00262816
chr2	162107500	162108251	8	13	0.000221307
chr2	162238875	162239426	14	16	<1.0E-10
chr2	163021100	163022126	9	18	1.57601e-05
chr2	165091900	165092526	7	9	0.00262816
chr2	165570550	165571201	8	10	0.000221307
chr2	165706000	165706626	7	11	0.00262816
chr2	166186400	166186901	8	9	0.000221307
chr2	166314525	166314976	13	13	1.15182e-10
chr2	166342825	166343401	11	13	5.24115e-08
chr2	168169075	168169651	9	12	1.57601e-05
chr2	168519400	168520501	9	18	1.57601e-05
chr2	169123025	169123601	8	11	0.000221307
chr2	170043925	170044701	7	10	0.00262816
chr2	170727700	170728901	19	29	<1.0E-10
chr2	171538575	171539001	7	7	0.00262816
chr2	177876500	177876951	7	8	0.00262816
chr2	180687450	180688176	7	11	0.00262816
chr2	181498250	181499351	7	16	0.00262816
chr3	3831725	3832376	8	10	0.000221307
chr3	4796600	4797301	9	13	1.57601e-05
chr3	5224600	5225676	13	26	1.15182e-10
chr3	5233250	5233801	8	10	0.000221307
chr3	5326375	5327401	9	25	1.57601e-05
chr3	5349750	5350601	9	14	1.57601e-05
chr3	5754450	5755551	14	25	<1.0E-10
chr3	8162300	8162951	7	10	0.00262816
chr3	8865400	8867201	22	46	<1.0E-10
chr3	8985675	8986326	7	10	0.00262816
chr3	13725475	13726001	15	17	<1.0E-10
chr3	17389475	17390076	7	10	0.00262816
chr3	17685250	17686276	8	16	0.000221307
chr3	18106075	18106476	8	8	0.000221307
chr3	20884875	20885901	9	19	1.57601e-05
chr3	21696700	21697401	7	10	0.00262816
chr3	21708950	21709601	12	16	2.57318e-09
chr3	21834325	21835451	10	22	9.67541e-07
chr3	24504550	24505101	8	9	0.000221307
chr3	29439950	29441001	10	20	9.67541e-07
chr3	31965925	31966601	8	13	0.000221307
chr3	33804075	33805051	16	25	<1.0E-10
chr3	34002900	34003451	10	12	9.67541e-07
chr3	34310275	34310826	7	9	0.00262816
chr3	34342250	34343576	7	18	0.00262816
chr3	34364275	34364801	7	8	0.00262816
chr3	34402800	34403501	10	14	9.67541e-07
chr3	34546850	34547651	12	18	2.57318e-09
chr3	34550275	34550751	7	8	0.00262816
chr3	34551800	34553176	9	21	1.57601e-05
chr3	34558500	34559176	7	10	0.00262816
chr3	34560950	34561476	7	8	0.00262816
chr3	34566500	34567901	16	30	<1.0E-10
chr3	34983000	34984026	10	19	9.67541e-07
chr3	34987025	34988101	11	25	5.24115e-08
chr3	35231800	35232301	12	13	2.57318e-09
chr3	35239275	35241351	10	36	9.67541e-07
chr3	35303450	35304201	9	15	1.57601e-05
chr3	36404375	36405201	7	11	0.00262816
chr3	36450050	36450826	11	18	5.24115e-08
chr3	37468150	37469426	8	18	0.000221307
chr3	37571475	37571951	7	8	0.00262816
chr3	37795675	37796501	17	25	<1.0E-10
chr3	38946175	38947876	15	30	<1.0E-10
chr3	39756025	39756626	7	10	0.00262816
chr3	39968975	39969926	13	22	1.15182e-10
chr3	40001625	40002201	8	11	0.000221307
chr3	40023050	40023926	8	15	0.000221307
chr3	51505150	51505826	7	10	0.00262816
chr3	51592600	51593551	8	18	0.000221307
chr3	52324225	52325076	11	19	5.24115e-08
chr3	53821975	53822726	11	15	5.24115e-08
chr3	56275075	56275851	11	17	5.24115e-08
chr3	60317125	60317801	7	10	0.00262816
chr3	62257900	62258426	8	10	0.000221307
chr3	62589875	62590526	13	16	1.15182e-10
chr3	65905825	65906926	14	25	<1.0E-10
chr3	65997925	65998551	7	10	0.00262816
chr3	66550450	66551176	12	18	2.57318e-09
chr3	66840300	66841201	7	12	0.00262816
chr3	67942900	67943701	9	14	1.57601e-05
chr3	68006075	68006576	7	8	0.00262816
chr3	69273825	69274301	7	8	0.00262816
chr3	78379500	78379901	7	8	0.00262816
chr3	78398725	78399251	10	11	9.67541e-07
chr3	78559550	78560126	7	9	0.00262816
chr3	78596325	78596926	12	14	2.57318e-09
chr3	79256575	79256951	7	7	0.00262816
chr3	80411700	80412326	9	12	1.57601e-05
chr3	80412425	80413076	10	13	9.67541e-07
chr3	82902125	82902876	7	12	0.00262816
chr3	83784025	83785326	12	24	2.57318e-09
chr3	84004350	84005001	7	10	0.00262816
chr3	84535875	84536551	7	11	0.00262816
chr3	84741550	84742501	8	16	0.000221307
chr3	86504675	86505751	11	22	5.24115e-08
chr3	86543675	86544201	7	9	0.00262816
chr3	86636425	86637276	11	20	5.24115e-08
chr3	86648575	86649651	8	15	0.000221307
chr3	87778050	87778726	8	12	0.000221307
chr3	87786875	87787451	7	9	0.00262816
chr3	87942175	87942801	9	12	1.57601e-05
chr3	88001375	88002401	8	16	0.000221307
chr3	88006650	88007201	7	9	0.00262816
chr3	88009150	88010676	17	44	<1.0E-10
chr3	88010725	88011176	8	9	0.000221307
chr3	88023875	88024801	9	14	1.57601e-05
chr3	88040900	88041626	11	15	5.24115e-08
chr3	88313725	88315026	15	26	<1.0E-10
chr3	89029825	89030301	8	9	0.000221307
chr3	89451250	89451926	9	13	1.57601e-05
chr3	91914575	91915176	11	14	5.24115e-08
chr3	95776500	95777526	13	22	1.15182e-10
chr3	97740300	97740701	7	7	0.00262816
chr3	100874325	100875051	10	14	9.67541e-07
chr3	103862875	103863401	7	9	0.00262816
chr3	105211150	105211851	12	16	2.57318e-09
chr3	105333625	105334226	9	11	1.57601e-05
chr3	106758350	106759026	12	16	2.57318e-09
chr3	108235675	108237076	8	23	0.000221307
chr3	109535100	109535726	7	10	0.00262816
chr3	115418800	115419276	7	7	0.00262816
chr3	115440450	115440976	7	8	0.00262816
chr3	115547525	115547951	7	8	0.00262816
chr3	116688025	116688476	8	8	0.000221307
chr3	118329000	118329876	12	21	2.57318e-09
chr3	118519600	118520051	7	7	0.00262816
chr3	118723950	118724751	7	11	0.00262816
chr3	119064325	119065676	11	24	5.24115e-08
chr3	119090575	119091201	8	11	0.000221307
chr3	121402950	121403951	10	21	9.67541e-07
chr3	126700325	126701676	10	23	9.67541e-07
chr3	126960650	126961276	10	13	9.67541e-07
chr3	127166400	127167226	7	12	0.00262816
chr3	127328425	127329251	11	20	5.24115e-08
chr3	127335525	127336026	7	8	0.00262816
chr3	127354650	127355151	7	8	0.00262816
chr3	127397875	127398576	12	17	2.57318e-09
chr3	127408325	127409151	14	24	<1.0E-10
chr3	127448650	127449851	9	20	1.57601e-05
chr3	127453050	127453851	7	11	0.00262816
chr3	130013675	130014076	7	7	0.00262816
chr3	130460475	130461776	11	26	5.24115e-08
chr3	130665975	130666801	9	16	1.57601e-05
chr3	132755250	132755701	8	9	0.000221307
chr3	133852800	133853576	8	13	0.000221307
chr3	133965400	133966026	7	9	0.00262816
chr3	134268400	134268901	8	9	0.000221307
chr3	137346400	137347051	11	17	5.24115e-08
chr3	138464000	138464351	7	7	0.00262816
chr3	139548900	139549951	9	22	1.57601e-05
chr3	141244150	141245301	12	20	2.57318e-09
chr3	141599450	141600226	8	13	0.000221307
chr3	141606050	141607026	7	16	0.00262816
chr3	141615600	141616351	8	11	0.000221307
chr3	143836375	143837776	8	18	0.000221307
chr3	145308825	145309851	13	21	1.15182e-10
chr3	146042675	146043601	9	19	1.57601e-05
chr3	146844225	146845826	7	20	0.00262816
chr3	148649000	148649551	8	10	0.000221307
chr3	148654600	148655576	9	16	1.57601e-05
chr3	148958000	148959351	7	20	0.00262816
chr3	152940100	152940851	7	12	0.00262816
chr3	153872500	153873426	7	14	0.00262816
chr3	154479375	154480601	15	31	<1.0E-10
chr3	156983975	156985376	9	23	1.57601e-05
chr3	159514625	159515526	9	15	1.57601e-05
chr3	159548125	159549501	15	35	<1.0E-10
chr4	5888950	5890926	29	69	<1.0E-10
chr4	6840325	6841401	19	34	<1.0E-10
chr4	7924000	7925151	7	16	0.00262816
chr4	8503900	8505501	11	27	5.24115e-08
chr4	8593950	8594476	7	8	0.00262816
chr4	8677900	8678401	13	13	1.15182e-10
chr4	8726075	8727226	20	32	<1.0E-10
chr4	8937825	8938376	7	9	0.00262816
chr4	8955325	8956126	8	14	0.000221307
chr4	10903225	10904176	10	20	9.67541e-07
chr4	11475675	11476176	8	9	0.000221307
chr4	12555600	12557076	7	19	0.00262816
chr4	13407700	13408101	8	8	0.000221307
chr4	13705675	13706376	7	10	0.00262816
chr4	20437575	20438526	15	23	<1.0E-10
chr4	22762125	22763576	11	24	5.24115e-08
chr4	23100325	23101126	10	18	9.67541e-07
chr4	24140400	24141451	8	20	0.000221307
chr4	24356050	24357101	9	19	1.57601e-05
chr4	25554275	25554876	13	17	1.15182e-10
chr4	28227375	28227951	7	10	0.00262816
chr4	29062750	29063451	12	16	2.57318e-09
chr4	31699050	31699876	11	17	5.24115e-08
chr4	32564750	32565476	8	11	0.000221307
chr4	32618075	32618976	8	15	0.000221307
chr4	33632250	33632951	8	12	0.000221307
chr4	35072275	35073151	11	20	5.24115e-08
chr4	35754375	35754976	11	14	5.24115e-08
chr4	41417500	41418301	11	19	5.24115e-08
chr4	43044600	43045026	7	8	0.00262816
chr4	43991275	43991701	7	7	0.00262816
chr4	44041400	44041901	7	7	0.00262816
chr4	45784375	45784776	7	8	0.00262816
chr4	45837125	45837976	9	16	1.57601e-05
chr4	45842675	45843876	12	25	2.57318e-09
chr4	45980850	45981476	7	11	0.00262816
chr4	47666150	47666501	8	9	0.000221307
chr4	48937375	48937826	8	9	0.000221307
chr4	52752800	52753301	7	7	0.00262816
chr4	53810025	53810701	9	14	1.57601e-05
chr4	54042975	54043526	8	10	0.000221307
chr4	54546975	54547326	7	7	0.00262816
chr4	54624950	54625951	8	14	0.000221307
chr4	54664550	54665851	10	24	9.67541e-07
chr4	54960925	54961501	7	9	0.00262816
chr4	55220525	55221526	7	12	0.00262816
chr4	55221725	55222226	16	16	<1.0E-10
chr4	57556550	57557001	7	8	0.00262816
chr4	58682725	58684401	17	36	<1.0E-10
chr4	62243775	62244201	7	8	0.00262816
chr4	62274100	62274651	7	9	0.00262816
chr4	64898725	64900101	7	17	0.00262816
chr4	64957625	64958976	14	26	<1.0E-10
chr4	65500150	65501126	7	14	0.00262816
chr4	65975950	65976376	7	7	0.00262816
chr4	65991450	65992201	7	11	0.00262816
chr4	70072700	70073501	8	12	0.000221307
chr4	70890800	70892076	9	23	1.57601e-05
chr4	71144750	71146101	13	27	1.15182e-10
chr4	71425675	71426651	14	22	<1.0E-10
chr4	71594100	71595226	15	26	<1.0E-10
chr4	71828300	71829751	12	37	2.57318e-09
chr4	72045450	72046151	7	12	0.00262816
chr4	80978450	80979026	7	10	0.00262816
chr4	81606800	81607301	9	11	1.57601e-05
chr4	81950025	81951251	15	30	<1.0E-10
chr4	82152675	82153751	8	17	0.000221307
chr4	82350400	82351226	11	18	5.24115e-08
chr4	82561600	82563151	11	28	5.24115e-08
chr4	82852650	82853726	10	22	9.67541e-07
chr4	85353125	85353801	12	18	2.57318e-09
chr4	87015625	87016176	8	10	0.000221307
chr4	89297075	89297876	7	12	0.00262816
chr4	89317275	89318126	7	11	0.00262816
chr4	89344525	89345201	7	10	0.00262816
chr4	90747075	90748001	9	19	1.57601e-05
chr4	90758825	90759776	9	14	1.57601e-05
chr4	92500650	92501151	8	9	0.000221307
chr4	94804050	94804751	8	11	0.000221307
chr4	94852050	94853076	14	28	<1.0E-10
chr4	96635975	96636501	8	10	0.000221307
chr4	97315725	97316476	7	11	0.00262816
chr4	97438825	97440351	8	25	0.000221307
chr4	97472350	97473276	7	15	0.00262816
chr4	97774675	97775901	24	45	<1.0E-10
chr4	97910625	97911576	9	18	1.57601e-05
chr4	98226750	98227276	7	9	0.00262816
chr4	98244625	98245126	10	12	9.67541e-07
chr4	99240375	99241276	10	17	9.67541e-07
chr4	100408275	100409176	10	16	9.67541e-07
chr4	100483575	100484826	14	35	<1.0E-10
chr4	100563375	100563876	8	9	0.000221307
chr4	101321125	101321976	7	12	0.00262816
chr4	102987175	102987851	7	11	0.00262816
chr4	103975700	103976201	7	7	0.00262816
chr4	104853400	104854451	9	22	1.57601e-05
chr4	105147525	105148176	7	11	0.00262816
chr4	106582500	106583451	7	15	0.00262816
chr4	106661525	106662426	10	19	9.67541e-07
chr4	107502900	107503801	8	13	0.000221307
chr4	108035400	108035976	7	9	0.00262816
chr4	109435175	109436176	19	32	<1.0E-10
chr4	109824875	109825601	7	9	0.00262816
chr4	109881800	109882701	12	17	2.57318e-09
chr4	109957900	109958726	14	20	<1.0E-10
chr4	116804150	116805151	11	19	5.24115e-08
chr4	118743500	118744426	9	15	1.57601e-05
chr4	119921275	119922101	9	15	1.57601e-05
chr4	122675750	122677101	10	23	9.67541e-07
chr4	122691000	122691526	8	10	0.000221307
chr4	123954075	123955576	7	20	0.00262816
chr4	124037150	124038151	9	20	1.57601e-05
chr4	124583500	124584001	8	9	0.000221307
chr4	124996650	124997251	7	9	0.00262816
chr4	125212225	125213026	9	17	1.57601e-05
chr4	125221975	125223001	8	16	0.000221307
chr4	125623275	125624101	7	14	0.00262816
chr4	126721675	126722176	7	7	0.00262816
chr4	128392500	128393876	19	37	<1.0E-10
chr4	130152275	130152901	10	14	9.67541e-07
chr4	130792150	130793376	26	40	<1.0E-10
chr4	130794425	130794901	7	7	0.00262816
chr4	131017650	131018051	9	9	1.57601e-05
chr4	131538825	131539551	11	15	5.24115e-08
chr4	131581400	131582151	9	14	1.57601e-05
chr4	131825600	131826476	7	12	0.00262816
chr4	133286000	133286901	7	11	0.00262816
chr4	133558675	133559276	14	16	<1.0E-10
chr4	135696400	135696976	7	10	0.00262816
chr4	136305750	136306176	8	9	0.000221307
chr4	136329000	136329601	7	10	0.00262816
chr4	138285175	138285651	8	8	0.000221307
chr4	139314725	139315176	8	8	0.000221307
chr4	142005550	142006151	7	9	0.00262816
chr4	142869550	142869976	7	7	0.00262816
chr4	148234100	148234626	7	9	0.00262816
chr4	148234675	148235276	7	10	0.00262816
chr4	148819325	148819776	7	8	0.00262816
chr4	151999450	152000151	9	12	1.57601e-05
chr4	152392100	152392951	7	13	0.00262816
chr4	152598700	152599351	12	16	2.57318e-09
chr4	153923900	153924476	7	9	0.00262816
chr4	153956675	153957551	7	13	0.00262816
chr4	153974125	153974651	8	9	0.000221307
chr4	154332300	154333276	17	26	<1.0E-10
chr4	155409075	155409451	17	17	<1.0E-10
chr5	4650975	4651626	7	10	0.00262816
chr5	4811975	4812826	9	14	1.57601e-05
chr5	4858000	4858726	9	14	1.57601e-05
chr5	4867675	4868376	10	15	9.67541e-07
chr5	5290500	5290776	8	8	0.000221307
chr5	10592425	10592926	13	14	1.15182e-10
chr5	13529200	13529726	7	9	0.00262816
chr5	14194925	14195851	7	12	0.00262816
chr5	15355850	15356751	14	20	<1.0E-10
chr5	15491600	15492151	9	11	1.57601e-05
chr5	21230225	21231276	10	18	9.67541e-07
chr5	21238175	21239376	14	27	<1.0E-10
chr5	22892300	22893151	8	12	0.000221307
chr5	22920025	22920676	10	14	9.67541e-07
chr5	22933300	22933726	7	7	0.00262816
chr5	23525100	23526076	9	20	1.57601e-05
chr5	23630125	23631201	7	16	0.00262816
chr5	23959375	23959901	8	10	0.000221307
chr5	25243950	25244801	15	26	<1.0E-10
chr5	27317900	27318501	11	14	5.24115e-08
chr5	29577775	29578351	7	9	0.00262816
chr5	33995025	33995526	7	8	0.00262816
chr5	35284375	35284901	9	11	1.57601e-05
chr5	40163025	40163576	15	17	<1.0E-10
chr5	40686175	40687051	8	15	0.000221307
chr5	44929175	44929726	16	17	<1.0E-10
chr5	45986475	45987351	8	14	0.000221307
chr5	46592575	46593351	10	17	9.67541e-07
chr5	47222150	47222601	9	10	1.57601e-05
chr5	47948175	47948901	7	14	0.00262816
chr5	53542575	53543526	7	16	0.00262816
chr5	53666650	53667251	8	10	0.000221307
chr5	54098700	54099276	7	9	0.00262816
chr5	65196825	65197801	9	16	1.57601e-05
chr5	66341200	66341976	7	11	0.00262816
chr5	68144125	68144751	8	11	0.000221307
chr5	74591975	74592701	9	12	1.57601e-05
chr5	75394750	75395901	17	28	<1.0E-10
chr5	75408650	75409451	8	14	0.000221307
chr5	75480650	75481526	7	11	0.00262816
chr5	75743425	75744076	14	17	<1.0E-10
chr5	77094350	77094901	8	9	0.000221307
chr5	77211550	77212501	10	18	9.67541e-07
chr5	77257100	77258251	20	28	<1.0E-10
chr5	77551000	77552501	13	33	1.15182e-10
chr5	79051425	79052126	9	12	1.57601e-05
chr5	80929625	80930176	8	8	0.000221307
chr5	85119425	85120076	8	12	0.000221307
chr5	85240250	85240951	11	14	5.24115e-08
chr5	85668200	85669476	15	27	<1.0E-10
chr5	86135175	86136101	7	12	0.00262816
chr5	91416725	91417301	7	10	0.00262816
chr5	92832975	92833451	8	10	0.000221307
chr5	93127500	93128101	7	10	0.00262816
chr5	93241950	93242401	10	10	9.67541e-07
chr5	97624175	97624676	10	11	9.67541e-07
chr5	97966825	97967326	7	9	0.00262816
chr5	98995500	98996351	10	17	9.67541e-07
chr5	99907800	99909076	12	26	2.57318e-09
chr5	101520175	101520576	7	7	0.00262816
chr5	101854825	101855351	8	10	0.000221307
chr5	103764875	103765351	7	8	0.00262816
chr5	104367775	104368201	7	7	0.00262816
chr5	104537725	104538201	7	7	0.00262816
chr5	104539000	104540026	10	20	9.67541e-07
chr5	104541200	104541701	8	10	0.000221307
chr5	106169450	106170001	8	10	0.000221307
chr5	106901000	106901501	8	9	0.000221307
chr5	106987975	106989101	8	17	0.000221307
chr5	107006325	107006951	11	14	5.24115e-08
chr5	107069425	107069951	12	13	2.57318e-09
chr5	107680825	107681676	10	15	9.67541e-07
chr5	107926500	107927351	7	13	0.00262816
chr5	110845600	110846601	21	38	<1.0E-10
chr5	110915550	110916101	8	10	0.000221307
chr5	111649625	111650376	21	27	<1.0E-10
chr5	111983675	111984376	10	16	9.67541e-07
chr5	112107475	112108051	7	10	0.00262816
chr5	112665925	112666976	13	22	1.15182e-10
chr5	112667875	112668551	8	12	0.000221307
chr5	112913875	112914526	7	10	0.00262816
chr5	112933050	112933601	14	15	<1.0E-10
chr5	112949800	112950526	9	14	1.57601e-05
chr5	113426575	113427076	7	8	0.00262816
chr5	113470450	113470976	7	9	0.00262816
chr5	113561675	113562826	14	26	<1.0E-10
chr5	113735725	113736426	8	11	0.000221307
chr5	113992950	113993426	7	8	0.00262816
chr5	114322800	114324101	11	29	5.24115e-08
chr5	115021500	115022226	8	13	0.000221307
chr5	115042800	115043426	7	10	0.00262816
chr5	115823575	115824076	7	8	0.00262816
chr5	115886225	115887551	8	23	0.000221307
chr5	116728300	116728901	10	12	9.67541e-07
chr5	117019650	117020526	12	16	2.57318e-09
chr5	117023200	117023701	7	7	0.00262816
chr5	117041900	117042826	9	19	1.57601e-05
chr5	118207900	118208301	7	8	0.00262816
chr5	118915600	118916351	8	12	0.000221307
chr5	119069025	119069551	7	8	0.00262816
chr5	120738225	120738826	7	9	0.00262816
chr5	124493500	124494051	10	11	9.67541e-07
chr5	124801150	124801701	7	9	0.00262816
chr5	125403150	125403751	7	10	0.00262816
chr5	125411225	125411601	7	7	0.00262816
chr5	125621475	125622101	9	13	1.57601e-05
chr5	125874075	125875351	8	22	0.000221307
chr5	128945575	128946151	8	10	0.000221307
chr5	128957275	128958126	8	15	0.000221307
chr5	129190250	129191051	8	12	0.000221307
chr5	129558225	129559176	9	16	1.57601e-05
chr5	132007550	132008101	9	10	1.57601e-05
chr5	132118575	132119626	8	17	0.000221307
chr5	132121100	132122351	12	28	2.57318e-09
chr5	132270550	132270926	7	7	0.00262816
chr5	132327575	132327976	7	8	0.00262816
chr5	132766475	132767676	13	28	1.15182e-10
chr5	133847000	133847426	7	7	0.00262816
chr5	133958075	133958676	7	10	0.00262816
chr5	134194000	134194526	7	9	0.00262816
chr5	134297025	134298201	15	27	<1.0E-10
chr5	134360700	134361376	8	13	0.000221307
chr5	134413475	134414551	15	26	<1.0E-10
chr5	134475425	134476351	8	13	0.000221307
chr5	135729350	135730276	7	14	0.00262816
chr5	137266750	137267351	8	11	0.000221307
chr5	138174975	138176026	7	15	0.00262816
chr5	140011575	140012076	7	7	0.00262816
chr5	140101950	140102526	7	9	0.00262816
chr5	140500075	140500376	7	7	0.00262816
chr5	141059925	141060576	7	10	0.00262816
chr5	142632975	142633451	8	10	0.000221307
chr5	142847250	142848051	9	13	1.57601e-05
chr5	143579250	143579801	7	9	0.00262816
chr5	143579975	143582026	8	25	0.000221307
chr5	147967000	147967476	7	8	0.00262816
chr5	148423050	148423626	7	9	0.00262816
chr5	149264950	149265751	7	11	0.00262816
chr5	149436500	149436976	8	9	0.000221307
chr5	150123100	150123676	8	11	0.000221307
chr5	150230575	150231901	8	18	0.000221307
chr5	150316475	150317501	7	19	0.00262816
chr5	150330775	150331601	11	16	5.24115e-08
chr6	4627125	4627626	9	10	1.57601e-05
chr6	5330200	5331576	14	30	<1.0E-10
chr6	5353025	5354076	7	13	0.00262816
chr6	6112975	6114101	14	27	<1.0E-10
chr6	6123400	6124026	7	10	0.00262816
chr6	6339975	6340451	8	8	0.000221307
chr6	6413800	6414176	9	10	1.57601e-05
chr6	6553775	6554251	7	8	0.00262816
chr6	6818775	6820101	10	26	9.67541e-07
chr6	7324550	7325101	8	9	0.000221307
chr6	8243875	8244701	15	24	<1.0E-10
chr6	8644000	8644776	8	13	0.000221307
chr6	11148250	11149026	8	11	0.000221307
chr6	13399125	13399676	7	9	0.00262816
chr6	14550475	14550826	7	7	0.00262816
chr6	15132825	15133401	7	10	0.00262816
chr6	15134475	15135676	9	20	1.57601e-05
chr6	15361700	15362426	9	12	1.57601e-05
chr6	16677100	16677826	7	11	0.00262816
chr6	16892600	16893126	7	9	0.00262816
chr6	17198300	17198651	7	7	0.00262816
chr6	17747025	17748026	13	25	1.15182e-10
chr6	21432900	21433351	7	7	0.00262816
chr6	22743950	22745901	19	63	<1.0E-10
chr6	22751725	22752176	8	8	0.000221307
chr6	22783600	22784176	7	9	0.00262816
chr6	22825125	22825626	8	10	0.000221307
chr6	22872875	22873326	7	8	0.00262816
chr6	23222825	23223776	10	18	9.67541e-07
chr6	23230625	23231376	15	22	<1.0E-10
chr6	23332300	23333376	11	20	5.24115e-08
chr6	23336400	23337251	7	14	0.00262816
chr6	23826325	23826876	8	10	0.000221307
chr6	28346175	28347126	14	25	<1.0E-10
chr6	28711550	28712676	7	15	0.00262816
chr6	29764475	29765176	8	12	0.000221307
chr6	30410675	30411501	12	19	2.57318e-09
chr6	30530375	30531001	7	10	0.00262816
chr6	30604250	30605201	9	16	1.57601e-05
chr6	31038950	31039926	8	14	0.000221307
chr6	32886350	32887026	7	10	0.00262816
chr6	33631775	33632776	9	15	1.57601e-05
chr6	33688925	33689326	7	8	0.00262816
chr6	35303975	35305426	10	26	9.67541e-07
chr6	36594550	36595676	13	25	1.15182e-10
chr6	36829950	36831376	9	21	1.57601e-05
chr6	38156800	38157426	9	12	1.57601e-05
chr6	39973975	39974876	9	16	1.57601e-05
chr6	47189550	47190351	10	15	9.67541e-07
chr6	47229275	47229701	8	8	0.000221307
chr6	47315650	47317401	7	23	0.00262816
chr6	49164725	49165476	7	13	0.00262816
chr6	49695250	49695726	7	7	0.00262816
chr6	50726825	50728426	18	44	<1.0E-10
chr6	51006825	51007676	12	18	2.57318e-09
chr6	51010100	51010726	7	9	0.00262816
chr6	51026850	51028001	15	30	<1.0E-10
chr6	52240575	52241001	8	8	0.000221307
chr6	52517125	52517876	10	14	9.67541e-07
chr6	52802525	52803051	7	8	0.00262816
chr6	52843250	52845201	13	29	1.15182e-10
chr6	53239700	53240051	9	9	1.57601e-05
chr6	53522700	53523651	13	19	1.15182e-10
chr6	54069625	54070176	7	8	0.00262816
chr6	54160575	54161826	8	19	0.000221307
chr6	54504025	54504926	10	18	9.67541e-07
chr6	54769725	54770176	8	8	0.000221307
chr6	55153275	55154051	7	10	0.00262816
chr6	55869900	55871726	8	24	0.000221307
chr6	60992625	60994526	14	39	<1.0E-10
chr6	61016600	61017226	7	10	0.00262816
chr6	63827125	63827951	7	12	0.00262816
chr6	66348700	66349826	9	20	1.57601e-05
chr6	71582950	71583676	7	12	0.00262816
chr6	71858500	71859576	8	13	0.000221307
chr6	72166450	72167351	16	25	<1.0E-10
chr6	72172400	72172976	8	11	0.000221307
chr6	72595050	72595776	11	14	5.24115e-08
chr6	72661075	72662176	8	16	0.000221307
chr6	72737200	72737726	7	8	0.00262816
chr6	75551900	75553076	9	20	1.57601e-05
chr6	76002775	76003451	11	14	5.24115e-08
chr6	77363500	77363976	8	9	0.000221307
chr6	78195000	78195501	9	10	1.57601e-05
chr6	85115375	85115926	13	14	1.15182e-10
chr6	85214925	85215776	7	14	0.00262816
chr6	87495150	87496051	8	16	0.000221307
chr6	88888125	88888726	7	10	0.00262816
chr6	93173800	93174251	8	9	0.000221307
chr6	93769875	93770876	7	15	0.00262816
chr6	93799225	93799876	10	13	9.67541e-07
chr6	93862400	93863926	17	35	<1.0E-10
chr6	93907050	93907476	7	8	0.00262816
chr6	93938975	93939651	7	10	0.00262816
chr6	94099800	94100251	7	9	0.00262816
chr6	94351100	94351576	8	8	0.000221307
chr6	94618075	94618801	10	16	9.67541e-07
chr6	94705350	94706201	9	15	1.57601e-05
chr6	94723325	94724301	7	17	0.00262816
chr6	94937125	94937776	7	11	0.00262816
chr6	95152125	95153576	7	23	0.00262816
chr6	95419550	95419976	7	7	0.00262816
chr6	96322900	96323801	9	13	1.57601e-05
chr6	97302550	97303001	12	13	2.57318e-09
chr6	97616425	97617601	12	24	2.57318e-09
chr6	98064000	98064526	8	9	0.000221307
chr6	98068100	98069226	7	15	0.00262816
chr6	98717675	98718276	10	13	9.67541e-07
chr6	98897525	98898676	9	18	1.57601e-05
chr6	99053950	99054401	7	7	0.00262816
chr6	99151850	99152351	7	9	0.00262816
chr6	99152700	99153301	7	9	0.00262816
chr6	100382325	100382826	7	8	0.00262816
chr6	101887350	101889101	11	37	5.24115e-08
chr6	104262850	104263401	9	10	1.57601e-05
chr6	104442750	104443301	7	9	0.00262816
chr6	107484150	107485151	8	14	0.000221307
chr6	107661225	107662426	14	29	<1.0E-10
chr6	108869275	108869801	9	11	1.57601e-05
chr6	108959575	108960226	8	11	0.000221307
chr6	112850175	112850676	7	8	0.00262816
chr6	112852675	112853701	7	17	0.00262816
chr6	112922575	112923476	8	15	0.000221307
chr6	112962375	112963001	9	12	1.57601e-05
chr6	113886800	113887326	8	10	0.000221307
chr6	114167200	114167676	9	10	1.57601e-05
chr6	114247325	114247726	8	8	0.000221307
chr6	116347300	116347826	7	9	0.00262816
chr6	116620825	116621401	7	10	0.00262816
chr6	120665725	120666376	8	12	0.000221307
chr6	122290275	122290951	8	13	0.000221307
chr6	127367800	127368626	8	15	0.000221307
chr6	127399550	127400576	7	17	0.00262816
chr6	134856550	134857226	7	9	0.00262816
chr6	136416650	136417651	12	23	2.57318e-09
chr6	136418850	136419801	7	16	0.00262816
chr6	137490950	137491501	8	10	0.000221307
chr6	138373300	138374151	8	14	0.000221307
chr6	138702950	138703726	13	19	1.15182e-10
chr6	140285000	140286201	7	16	0.00262816
chr6	141444150	141444701	8	10	0.000221307
chr6	143889625	143890576	8	14	0.000221307
chr6	143943400	143944151	12	19	2.57318e-09
chr6	144055400	144055901	8	8	0.000221307
chr6	144199625	144201501	24	58	<1.0E-10
chr6	144260800	144262201	18	34	<1.0E-10
chr6	144402775	144403251	7	9	0.00262816
chr6	144429600	144430226	11	14	5.24115e-08
chr6	144629500	144630376	7	14	0.00262816
chr6	144893350	144894401	13	20	1.15182e-10
chr6	147093825	147094251	7	7	0.00262816
chr6	148286750	148287476	8	11	0.000221307
[truncated: 455 more rows]

## Sheet: Suppl. Table 3
Midbrain p300 Peaks (mm9)
Chromosome	Start	End	Maximum Peak Height	Total Overlapping Reads	FDR
chr1	5221850	5223476	10	28	1.09949e-06
chr1	12045750	12046576	10	18	1.09949e-06
chr1	20291650	20293526	9	28	2.01852e-05
chr1	24619000	24619876	9	13	2.01852e-05
chr1	41446950	41447851	13	23	1.01633e-10
chr1	42945300	42945851	7	8	0.00443628
chr1	51678850	51679451	7	9	0.00443628
chr1	57918600	57919451	11	18	5.39638e-08
chr1	64113025	64113851	8	12	0.000325735
chr1	66701750	66702201	7	8	0.00443628
chr1	67412100	67413526	7	20	0.00443628
chr1	69151675	69152526	9	15	2.01852e-05
chr1	73215825	73216901	12	22	2.42511e-09
chr1	73217200	73217601	7	8	0.00443628
chr1	73689300	73689676	7	7	0.00443628
chr1	78135950	78136526	9	11	2.01852e-05
chr1	79857800	79858301	7	8	0.00443628
chr1	81589850	81590476	8	12	0.000325735
chr1	87813125	87813801	9	12	2.01852e-05
chr1	90157100	90157601	7	7	0.00443628
chr1	90565300	90565776	7	8	0.00443628
chr1	93310600	93311826	7	17	0.00443628
chr1	99745075	99745751	7	12	0.00443628
chr1	100086625	100087351	8	12	0.000325735
chr1	106659475	106659951	7	8	0.00443628
chr1	106813875	106814526	7	9	0.00443628
chr1	120851400	120851901	7	7	0.00443628
chr1	122540275	122541251	7	12	0.00443628
chr1	132975375	132976251	9	15	2.01852e-05
chr1	134218600	134220426	16	40	<1.0E-10
chr1	134976575	134977326	9	14	2.01852e-05
chr1	135077775	135078276	8	9	0.000325735
chr1	135388925	135389851	8	16	0.000325735
chr1	135958700	135959876	7	17	0.00443628
chr1	135960025	135960626	8	10	0.000325735
chr1	139553375	139554076	8	12	0.000325735
chr1	140396800	140397726	7	14	0.00443628
chr1	140468075	140468726	8	10	0.000325735
chr1	155550525	155551501	7	13	0.00443628
chr1	160196875	160197376	10	12	1.09949e-06
chr1	170287950	170288651	8	11	0.000325735
chr1	177944075	177944576	8	10	0.000325735
chr1	178809600	178810701	9	18	2.01852e-05
chr1	179080250	179081126	22	40	<1.0E-10
chr1	179485800	179486376	7	10	0.00443628
chr1	185889950	185890476	7	8	0.00443628
chr1	196049100	196049676	8	10	0.000325735
chr10	6454375	6455226	8	13	0.000325735
chr10	12827950	12828726	7	13	0.00443628
chr10	16922400	16923226	7	11	0.00443628
chr10	36858550	36859501	7	12	0.00443628
chr10	37097750	37098901	7	14	0.00443628
chr10	37116875	37117851	11	19	5.39638e-08
chr10	37159950	37160726	9	14	2.01852e-05
chr10	37386400	37387401	12	19	2.42511e-09
chr10	38273275	38274226	22	29	<1.0E-10
chr10	40217300	40217776	7	7	0.00443628
chr10	50977400	50977976	8	11	0.000325735
chr10	52462350	52462926	7	10	0.00443628
chr10	57288775	57289601	8	14	0.000325735
chr10	57504000	57505001	7	15	0.00443628
chr10	61720975	61721501	8	8	0.000325735
chr10	67070800	67071351	7	8	0.00443628
chr10	69601950	69602951	8	14	0.000325735
chr10	71755825	71756376	8	8	0.000325735
chr10	85002200	85002826	8	11	0.000325735
chr10	92019175	92020176	8	17	0.000325735
chr10	95058400	95059026	9	12	2.01852e-05
chr10	95771650	95772176	7	8	0.00443628
chr10	105075850	105076226	8	9	0.000325735
chr10	111138925	111139376	7	7	0.00443628
chr10	126946075	126946601	8	9	0.000325735
chr11	5290900	5291826	8	13	0.000325735
chr11	18783150	18783826	10	14	1.09949e-06
chr11	20753725	20754826	8	16	0.000325735
chr11	23458325	23458801	7	7	0.00443628
chr11	31731375	31731926	7	9	0.00443628
chr11	34206850	34207226	7	7	0.00443628
chr11	35670150	35670526	7	7	0.00443628
chr11	44713225	44713851	8	10	0.000325735
chr11	52881425	52882201	7	12	0.00443628
chr11	54567925	54568476	7	9	0.00443628
chr11	62994175	62994676	11	12	5.39638e-08
chr11	63727000	63727476	7	7	0.00443628
chr11	66659650	66660176	8	10	0.000325735
chr11	67819675	67820076	7	7	0.00443628
chr11	67958200	67958676	9	9	2.01852e-05
chr11	67982425	67982951	7	8	0.00443628
chr11	69230575	69231276	7	10	0.00443628
chr11	71571600	71572401	10	16	1.09949e-06
chr11	76103700	76104401	7	10	0.00443628
chr11	78599550	78600201	7	11	0.00443628
chr11	80125650	80126276	7	10	0.00443628
chr11	83856800	83857326	8	8	0.000325735
chr11	88087850	88089351	9	27	2.01852e-05
chr11	95210625	95211176	7	8	0.00443628
chr11	96736900	96737976	9	18	2.01852e-05
chr11	112731525	112732276	8	13	0.000325735
chr11	113300800	113301551	12	16	2.42511e-09
chr11	113646700	113647576	10	16	1.09949e-06
chr11	118834250	118834676	8	9	0.000325735
chr12	12731750	12732151	7	7	0.00443628
chr12	25809475	25809976	7	8	0.00443628
chr12	28250775	28251551	7	12	0.00443628
chr12	29502050	29502901	16	22	<1.0E-10
chr12	29780575	29781201	8	11	0.000325735
chr12	40253450	40254176	7	11	0.00443628
chr12	45439050	45439601	7	9	0.00443628
chr12	54133625	54134176	7	9	0.00443628
chr12	71523500	71524401	9	16	2.01852e-05
chr12	80820100	80820726	13	16	1.01633e-10
chr12	81163150	81164326	8	16	0.000325735
chr12	82099400	82100351	8	16	0.000325735
chr12	83470450	83470976	7	8	0.00443628
chr12	88127525	88128551	9	15	2.01852e-05
chr12	90387600	90388101	8	9	0.000325735
chr12	91370975	91371426	7	7	0.00443628
chr12	98408975	98409551	7	8	0.00443628
chr12	99800675	99801276	12	15	2.42511e-09
chr12	100249375	100250151	8	14	0.000325735
chr12	100458300	100459326	18	34	<1.0E-10
chr12	100577900	100578776	18	27	<1.0E-10
chr12	104402225	104403276	7	18	0.00443628
chr12	109558675	109559201	7	8	0.00443628
chr12	109803050	109803576	9	10	2.01852e-05
chr12	112931825	112932326	9	10	2.01852e-05
chr12	118496025	118496576	7	9	0.00443628
chr13	6193575	6194026	7	7	0.00443628
chr13	9795125	9795926	10	18	1.09949e-06
chr13	12651675	12652351	7	11	0.00443628
chr13	15577750	15578501	8	12	0.000325735
chr13	18404175	18404926	7	11	0.00443628
chr13	24892550	24893051	7	9	0.00443628
chr13	25842325	25843751	10	24	1.09949e-06
chr13	26246550	26247476	18	29	<1.0E-10
chr13	28502150	28502801	8	11	0.000325735
chr13	28507625	28509151	11	29	5.39638e-08
chr13	29462900	29463301	7	8	0.00443628
chr13	29702300	29702801	9	11	2.01852e-05
chr13	34340400	34341201	8	14	0.000325735
chr13	34762175	34762901	9	15	2.01852e-05
chr13	36374650	36375626	16	27	<1.0E-10
chr13	37608975	37609726	8	11	0.000325735
chr13	39615700	39616376	8	13	0.000325735
chr13	39972800	39973601	7	12	0.00443628
chr13	43626450	43626976	8	10	0.000325735
chr13	44846725	44847701	7	13	0.00443628
chr13	48249900	48250326	7	7	0.00443628
chr13	52014125	52014576	8	9	0.000325735
chr13	52015875	52016576	16	22	<1.0E-10
chr13	53550350	53551126	7	11	0.00443628
chr13	53649350	53650101	7	10	0.00443628
chr13	56359200	56359676	7	9	0.00443628
chr13	59192825	59193751	15	24	<1.0E-10
chr13	60248600	60249026	7	8	0.00443628
chr13	60279050	60279501	7	8	0.00443628
chr13	63655500	63656351	8	13	0.000325735
chr13	63728450	63729126	8	12	0.000325735
chr13	71274900	71275401	7	8	0.00443628
chr13	71297350	71297951	12	14	2.42511e-09
chr13	71304125	71304776	11	15	5.39638e-08
chr13	72435625	72436601	8	15	0.000325735
chr13	73171925	73172801	13	21	1.01633e-10
chr13	84198775	84199701	11	20	5.39638e-08
chr13	84487525	84488251	8	14	0.000325735
chr13	84710850	84711701	14	20	<1.0E-10
chr13	95345375	95346101	7	12	0.00443628
chr13	98020100	98021301	14	29	<1.0E-10
chr13	98061550	98063151	12	26	2.42511e-09
chr13	98206275	98207226	7	11	0.00443628
chr13	100560675	100561251	8	12	0.000325735
chr13	103274450	103275201	8	11	0.000325735
chr13	103685850	103686401	7	9	0.00443628
chr13	111365200	111365701	7	8	0.00443628
chr13	111393050	111393601	8	9	0.000325735
chr13	114670225	114670751	9	11	2.01852e-05
chr13	120276100	120276876	9	14	2.01852e-05
chr13	120277550	120277901	8	8	0.000325735
chr14	9119000	9119551	7	9	0.00443628
chr14	17033100	17034151	10	21	1.09949e-06
chr14	24412000	24412601	7	11	0.00443628
chr14	25928075	25928801	8	11	0.000325735
chr14	26136825	26138101	15	31	<1.0E-10
chr14	49360625	49361301	8	12	0.000325735
chr14	49434775	49435476	7	11	0.00443628
chr14	49472550	49473576	7	15	0.00443628
chr14	55774900	55775376	7	7	0.00443628
chr14	65864125	65864726	16	20	<1.0E-10
chr14	66099000	66099526	9	11	2.01852e-05
chr14	67113100	67113776	10	16	1.09949e-06
chr14	76654325	76655526	7	16	0.00443628
chr14	80281525	80282226	7	11	0.00443628
chr14	105882325	105883076	8	14	0.000325735
chr14	118629075	118630526	23	53	<1.0E-10
chr14	123888050	123888626	10	14	1.09949e-06
chr15	9869775	9870076	7	7	0.00443628
chr15	10584750	10585876	14	24	<1.0E-10
chr15	13322725	13323476	8	13	0.000325735
chr15	21586000	21586551	7	8	0.00443628
chr15	25691425	25692276	10	15	1.09949e-06
chr15	26090750	26091276	7	7	0.00443628
chr15	52166550	52167001	7	8	0.00443628
chr15	52244575	52245376	17	22	<1.0E-10
chr15	52795500	52795901	8	9	0.000325735
chr15	58871975	58872926	8	17	0.000325735
chr15	62086850	62087451	7	9	0.00443628
chr15	66070475	66071801	8	24	0.000325735
chr15	66156075	66156901	7	11	0.00443628
chr15	85289025	85289526	10	11	1.09949e-06
chr15	86107000	86107576	7	9	0.00443628
chr15	88812725	88813201	7	8	0.00443628
chr15	95043475	95044026	7	8	0.00443628
chr15	98628400	98629051	10	12	1.09949e-06
chr15	98799200	98799851	8	13	0.000325735
chr15	98817100	98818026	7	13	0.00443628
chr15	100740075	100740601	7	9	0.00443628
chr16	3744575	3745126	8	9	0.000325735
chr16	7052575	7053226	8	10	0.000325735
chr16	12901775	12902276	7	8	0.00443628
chr16	16726050	16726601	8	9	0.000325735
chr16	21664750	21665801	16	28	<1.0E-10
chr16	30129050	30129926	7	11	0.00443628
chr16	33605850	33606901	8	20	0.000325735
chr16	34561975	34562326	7	7	0.00443628
chr16	42269250	42269851	8	12	0.000325735
chr16	42575625	42576426	7	12	0.00443628
chr16	42718075	42718576	7	7	0.00443628
chr16	43503075	43503701	7	9	0.00443628
chr16	44530025	44531576	12	25	2.42511e-09
chr16	44672175	44672751	7	10	0.00443628
chr16	63091250	63092126	10	18	1.09949e-06
chr16	63752775	63753401	9	14	2.01852e-05
chr16	64068575	64069626	14	23	<1.0E-10
chr16	70316125	70316451	8	9	0.000325735
chr16	72678650	72679126	7	8	0.00443628
chr16	77400475	77401251	13	18	1.01633e-10
chr16	77421525	77423076	10	25	1.09949e-06
chr16	77590250	77590701	7	8	0.00443628
chr16	84017175	84017476	7	7	0.00443628
chr16	85308175	85308601	8	10	0.000325735
chr16	90656825	90657376	7	9	0.00443628
chr16	91140650	91141101	8	9	0.000325735
chr17	9772750	9773401	7	11	0.00443628
chr17	10098925	10099576	8	12	0.000325735
chr17	15479875	15480551	12	16	2.42511e-09
chr17	15513575	15514776	11	19	5.39638e-08
chr17	15518075	15519051	7	13	0.00443628
chr17	15577300	15578101	8	12	0.000325735
chr17	30604325	30605351	8	16	0.000325735
chr17	31019025	31019401	7	8	0.00443628
chr17	34162425	34163301	7	15	0.00443628
chr17	45384275	45384726	7	9	0.00443628
chr17	48035100	48036101	7	14	0.00443628
chr17	59071775	59072501	8	13	0.000325735
chr17	63089075	63089851	8	11	0.000325735
chr17	66828825	66829426	7	10	0.00443628
chr17	66829625	66830251	9	11	2.01852e-05
chr17	68011950	68012426	7	8	0.00443628
chr17	68345350	68345901	7	8	0.00443628
chr17	78900575	78901301	11	14	5.39638e-08
chr17	81059025	81059926	7	13	0.00443628
chr17	89337225	89337826	7	10	0.00443628
chr17	91095750	91096126	7	7	0.00443628
chr18	5160350	5160726	7	7	0.00443628
chr18	5427900	5429151	8	16	0.000325735
chr18	10735550	10736276	7	12	0.00443628
chr18	12184500	12185426	10	15	1.09949e-06
chr18	12730300	12730726	7	8	0.00443628
chr18	35113700	35114301	7	10	0.00443628
chr18	36047175	36047901	7	10	0.00443628
chr18	54334400	54335501	11	19	5.39638e-08
chr18	54879475	54880151	10	14	1.09949e-06
chr18	55150175	55151101	7	13	0.00443628
chr18	55296125	55296626	7	7	0.00443628
chr18	55587950	55588801	7	14	0.00443628
chr18	55709350	55710076	7	12	0.00443628
chr18	55945000	55945976	7	14	0.00443628
chr18	55975425	55976426	11	20	5.39638e-08
chr18	62962575	62963051	7	7	0.00443628
chr18	72359025	72359526	7	7	0.00443628
chr18	72501375	72501976	8	11	0.000325735
chr18	72884575	72885551	13	21	1.01633e-10
chr18	73108700	73109651	10	17	1.09949e-06
chr18	78651450	78652526	12	24	2.42511e-09
chr18	79245850	79246926	16	24	<1.0E-10
chr19	12563675	12564526	10	16	1.09949e-06
chr19	14581250	14582076	7	12	0.00443628
chr19	15877550	15878151	8	11	0.000325735
chr19	18167075	18167376	7	7	0.00443628
chr19	21240025	21240801	11	17	5.39638e-08
chr19	21858625	21859601	7	15	0.00443628
chr19	21864100	21864676	9	11	2.01852e-05
chr19	26919425	26920451	9	21	2.01852e-05
chr19	31016850	31017351	8	10	0.000325735
chr19	41265100	41265776	7	9	0.00443628
chr19	55630700	55631351	7	9	0.00443628
chr19	56136450	56137001	7	9	0.00443628
chr19	56302650	56303201	7	9	0.00443628
chr19	61299525	61300326	7	11	0.00443628
chr2	4074075	4074601	7	9	0.00443628
chr2	6182150	6182926	15	20	<1.0E-10
chr2	7231625	7232301	7	10	0.00443628
chr2	21839825	21840576	10	12	1.09949e-06
chr2	21885600	21886076	7	7	0.00443628
chr2	24981550	24982201	13	17	1.01633e-10
chr2	26342125	26342576	8	9	0.000325735
chr2	26356075	26356651	9	12	2.01852e-05
chr2	27996300	27996776	7	7	0.00443628
chr2	28083100	28083851	7	11	0.00443628
chr2	31355250	31355676	13	13	1.01633e-10
chr2	38076275	38077076	7	12	0.00443628
chr2	38279900	38280476	7	9	0.00443628
chr2	38679225	38679776	7	9	0.00443628
chr2	40766450	40766976	12	14	2.42511e-09
chr2	48394275	48394926	8	13	0.000325735
chr2	50921500	50922476	7	13	0.00443628
chr2	59020800	59021301	7	8	0.00443628
chr2	65866725	65867176	7	7	0.00443628
chr2	77744650	77745176	8	10	0.000325735
chr2	77765900	77766676	7	12	0.00443628
chr2	77779850	77780701	7	13	0.00443628
chr2	77781550	77782501	7	13	0.00443628
chr2	77825975	77826451	7	7	0.00443628
chr2	77863600	77864551	7	12	0.00443628
chr2	78888175	78888576	7	8	0.00443628
chr2	93014150	93015026	13	18	1.01633e-10
chr2	97037100	97037551	8	9	0.000325735
chr2	101818950	101819451	9	11	2.01852e-05
chr2	101843350	101844201	7	13	0.00443628
chr2	102277425	102278176	7	9	0.00443628
chr2	102503375	102504401	7	13	0.00443628
chr2	110141650	110142151	7	9	0.00443628
chr2	116633550	116634476	14	24	<1.0E-10
chr2	125841025	125841901	7	12	0.00443628
chr2	131016025	131016901	8	12	0.000325735
chr2	133188575	133189226	7	11	0.00443628
chr2	137531125	137532076	10	18	1.09949e-06
chr2	140479275	140479751	7	8	0.00443628
chr2	141137725	141138351	12	15	2.42511e-09
chr2	151816600	151817751	8	19	0.000325735
chr2	154247000	154247826	8	15	0.000325735
chr2	154291425	154292626	7	19	0.00443628
chr2	157288775	157289276	7	8	0.00443628
chr2	165713750	165714301	8	10	0.000325735
chr2	168502875	168503601	8	12	0.000325735
chr3	5237225	5237776	8	10	0.000325735
chr3	8865900	8866626	12	18	2.42511e-09
chr3	17389700	17390176	8	9	0.000325735
chr3	20675375	20676101	10	16	1.09949e-06
chr3	29067500	29068201	10	13	1.09949e-06
chr3	30117900	30118576	7	10	0.00443628
chr3	30119950	30120501	8	10	0.000325735
chr3	30315175	30315701	10	11	1.09949e-06
chr3	34558675	34559426	7	11	0.00443628
chr3	34986900	34988201	9	18	2.01852e-05
chr3	35303350	35304451	7	17	0.00443628
chr3	36450225	36450951	9	11	2.01852e-05
chr3	49690475	49691051	15	17	<1.0E-10
chr3	51592700	51593451	9	13	2.01852e-05
chr3	55558975	55559751	8	13	0.000325735
chr3	55769450	55770226	12	18	2.42511e-09
chr3	65732525	65732976	7	8	0.00443628
chr3	84652750	84653151	7	7	0.00443628
chr3	84741775	84742476	16	22	<1.0E-10
chr3	86375100	86376051	7	11	0.00443628
chr3	86376525	86377051	7	8	0.00443628
chr3	103223325	103223851	7	9	0.00443628
chr3	105934600	105935326	7	10	0.00443628
chr3	108235750	108237051	9	20	2.01852e-05
chr3	108370725	108371826	8	15	0.000325735
chr3	109720750	109721251	7	8	0.00443628
chr3	109899475	109899926	7	8	0.00443628
chr3	115334600	115335176	7	9	0.00443628
chr3	116688050	116688451	7	7	0.00443628
chr3	119090425	119091201	9	13	2.01852e-05
chr3	121403075	121403676	7	10	0.00443628
chr3	132407375	132407926	7	9	0.00443628
chr3	133276925	133277326	7	7	0.00443628
chr3	137346475	137347376	15	21	<1.0E-10
chr3	138407000	138407476	7	8	0.00443628
chr3	147630775	147631326	9	11	2.01852e-05
chr4	6907125	6908251	8	18	0.000325735
chr4	8504375	8505026	14	21	<1.0E-10
chr4	8726600	8727151	7	9	0.00443628
chr4	12547450	12548176	7	12	0.00443628
chr4	12555900	12556851	7	14	0.00443628
chr4	20187975	20188826	10	18	1.09949e-06
chr4	22424175	22424876	8	11	0.000325735
chr4	22897525	22898001	7	7	0.00443628
chr4	23714325	23715376	8	15	0.000325735
chr4	27432200	27433151	9	19	2.01852e-05
chr4	44864575	44865251	13	18	1.01633e-10
chr4	53809800	53810451	8	12	0.000325735
chr4	54041525	54042476	8	15	0.000325735
chr4	57837250	57838026	7	13	0.00443628
chr4	61505975	61506951	7	13	0.00443628
chr4	63050000	63050401	8	8	0.000325735
chr4	63394725	63395151	7	7	0.00443628
chr4	64099800	64100251	7	7	0.00443628
chr4	71425975	71426501	7	8	0.00443628
chr4	71828625	71829401	8	13	0.000325735
chr4	81389900	81390451	8	10	0.000325735
chr4	81949950	81950826	12	18	2.42511e-09
chr4	86881525	86881976	7	7	0.00443628
chr4	87369475	87369851	7	7	0.00443628
chr4	97774750	97775851	8	18	0.000325735
chr4	109824925	109825751	7	13	0.00443628
chr4	122691100	122691676	7	10	0.00443628
chr4	125623200	125623726	7	9	0.00443628
chr4	125925400	125926351	8	14	0.000325735
chr4	126384150	126384676	7	8	0.00443628
chr4	128392250	128394376	7	26	0.00443628
chr4	130152125	130152926	7	12	0.00443628
chr4	133985975	133987001	7	14	0.00443628
chr4	135079425	135080651	9	23	2.01852e-05
chr4	135695750	135696826	7	14	0.00443628
chr4	136305550	136306101	7	8	0.00443628
chr4	136417900	136418651	7	10	0.00443628
chr4	141457850	141458401	10	12	1.09949e-06
chr4	148259875	148260676	7	11	0.00443628
chr4	153845950	153846526	8	11	0.000325735
chr4	154326600	154327176	8	11	0.000325735
chr4	155409050	155409551	19	20	<1.0E-10
chr5	4877025	4877701	7	11	0.00443628
chr5	5008375	5008851	7	8	0.00443628
chr5	22892650	22893401	7	13	0.00443628
chr5	22919875	22920776	9	16	2.01852e-05
chr5	23177775	23178176	7	7	0.00443628
chr5	32786450	32786951	7	7	0.00443628
chr5	35284100	35284876	7	12	0.00443628
chr5	44929175	44929651	7	9	0.00443628
chr5	66341425	66341876	7	8	0.00443628
chr5	68047450	68048501	9	17	2.01852e-05
chr5	75275675	75276151	7	9	0.00443628
chr5	77094350	77095326	9	16	2.01852e-05
chr5	80929625	80930176	9	10	2.01852e-05
chr5	85239950	85241126	8	18	0.000325735
chr5	99908050	99909076	10	20	1.09949e-06
chr5	101854950	101855426	7	8	0.00443628
chr5	101950150	101950901	7	12	0.00443628
chr5	104539350	104540001	9	12	2.01852e-05
chr5	110915500	110916051	7	9	0.00443628
chr5	111649650	111650301	11	16	5.39638e-08
chr5	112933300	112933651	8	9	0.000325735
chr5	114322900	114323351	10	11	1.09949e-06
chr5	115041075	115042051	9	16	2.01852e-05
chr5	115848275	115848751	8	9	0.000325735
chr5	115886350	115887176	7	12	0.00443628
chr5	117019525	117020376	10	17	1.09949e-06
chr5	124493575	124494101	11	12	5.39638e-08
chr5	127803650	127804801	8	15	0.000325735
chr5	133450675	133451176	8	9	0.000325735
chr5	136433650	136434151	7	8	0.00443628
chr5	141059525	141060501	9	16	2.01852e-05
chr5	150230850	150231301	7	7	0.00443628
chr5	150291450	150292226	8	11	0.000325735
chr6	5330375	5331226	12	20	2.42511e-09
chr6	12469050	12469601	8	9	0.000325735
chr6	30566400	30567076	7	10	0.00443628
chr6	38157025	38157826	7	11	0.00443628
chr6	39385000	39385701	10	12	1.09949e-06
chr6	39999925	40000401	7	7	0.00443628
chr6	47189400	47190101	10	13	1.09949e-06
chr6	47315625	47316376	8	11	0.000325735
chr6	47600475	47600976	7	8	0.00443628
chr6	50726725	50727301	8	11	0.000325735
chr6	50840850	50841326	7	8	0.00443628
chr6	65621275	65621751	7	7	0.00443628
chr6	73469800	73470076	7	7	0.00443628
chr6	78195050	78195451	7	8	0.00443628
chr6	88962850	88963626	7	13	0.00443628
chr6	93770175	93771026	7	11	0.00443628
chr6	112788850	112789276	7	7	0.00443628
chr6	112853075	112853751	9	13	2.01852e-05
chr6	112962325	112962801	7	8	0.00443628
chr6	119442200	119443001	8	16	0.000325735
chr6	136416825	136417451	8	11	0.000325735
chr6	136418875	136419701	10	16	1.09949e-06
chr6	146166400	146166851	7	7	0.00443628
chr7	17400300	17400926	7	9	0.00443628
chr7	29087000	29087826	7	12	0.00443628
chr7	38960600	38961601	7	15	0.00443628
chr7	38962350	38962776	7	8	0.00443628
chr7	47646125	47646876	7	10	0.00443628
chr7	69560950	69561426	7	8	0.00443628
chr7	69568025	69568701	14	18	<1.0E-10
chr7	69606925	69607426	7	8	0.00443628
chr7	71101825	71102451	7	10	0.00443628
chr7	79918800	79919426	8	13	0.000325735
chr7	79982750	79983501	7	10	0.00443628
chr7	80285825	80286501	7	10	0.00443628
chr7	80329875	80331026	10	20	1.09949e-06
chr7	80336525	80337501	14	24	<1.0E-10
chr7	86650600	86651051	7	8	0.00443628
chr7	86670475	86671351	15	21	<1.0E-10
chr7	91596700	91597451	10	16	1.09949e-06
chr7	102123475	102124401	8	13	0.000325735
chr7	107236850	107237126	8	8	0.000325735
chr7	116339750	116340451	8	13	0.000325735
chr7	119969650	119970076	10	11	1.09949e-06
chr7	122103275	122103776	8	10	0.000325735
chr7	132406075	132406776	7	9	0.00443628
chr7	133415350	133415776	7	8	0.00443628
chr7	134376025	134376626	7	10	0.00443628
chr7	139454225	139454776	8	10	0.000325735
chr7	141553850	141554601	8	12	0.000325735
chr7	144508050	144508651	8	11	0.000325735
chr7	151813725	151814926	18	36	<1.0E-10
chr8	10760625	10761176	7	9	0.00443628
chr8	12429725	12430651	7	14	0.00443628
chr8	37218600	37219326	9	14	2.01852e-05
chr8	46960275	46960776	8	10	0.000325735
chr8	48327600	48328576	8	15	0.000325735
chr8	49363650	49364101	7	8	0.00443628
chr8	60397925	60398401	8	9	0.000325735
chr8	63994850	63995401	10	10	1.09949e-06
chr8	71645200	71646001	12	21	2.42511e-09
chr8	73179900	73180951	8	20	0.000325735
chr8	82629050	82629601	7	8	0.00443628
chr8	90355500	90355976	9	10	2.01852e-05
chr8	92768475	92769401	25	35	<1.0E-10
chr8	93019950	93021001	9	17	2.01852e-05
chr8	93264350	93265251	7	13	0.00443628
chr8	94582950	94583426	7	8	0.00443628
chr8	96408175	96408701	7	7	0.00443628
chr8	100833075	100834051	13	21	1.01633e-10
chr8	101938650	101939076	7	7	0.00443628
chr8	105250125	105250826	7	10	0.00443628
chr8	122832875	122833776	7	11	0.00443628
chr8	122846800	122847676	9	15	2.01852e-05
chr8	122940275	122941101	9	13	2.01852e-05
chr8	126807650	126809076	8	19	0.000325735
chr9	16197300	16197776	7	8	0.00443628
chr9	40819525	40820301	7	12	0.00443628
chr9	48483225	48483776	7	9	0.00443628
chr9	51954375	51954876	11	11	5.39638e-08
chr9	51957400	51957926	10	11	1.09949e-06
chr9	51959900	51960276	7	7	0.00443628
chr9	54930900	54931426	7	8	0.00443628
chr9	59011000	59012026	9	14	2.01852e-05
chr9	60114225	60115276	9	18	2.01852e-05
chr9	60929450	60929801	7	7	0.00443628
chr9	60959525	60960201	10	12	1.09949e-06
chr9	61208775	61209476	8	11	0.000325735
chr9	72003175	72003701	9	10	2.01852e-05
chr9	74773075	74773801	7	10	0.00443628
chr9	77187850	77188526	7	10	0.00443628
chr9	90587700	90588476	11	16	5.39638e-08
chr9	96880925	96881401	7	8	0.00443628
chr9	96951625	96952151	7	9	0.00443628
chr9	97726525	97727226	7	11	0.00443628
chr9	102113700	102114576	8	18	0.000325735
chr9	102592125	102593826	12	30	2.42511e-09
chr9	106028875	106029851	9	18	2.01852e-05
chr9	106355075	106355601	9	10	2.01852e-05
chr9	121241150	121241751	10	14	1.09949e-06
chr9	122587225	122587701	7	8	0.00443628
chrX	14316925	14317451	7	8	0.00443628
chrX	100728450	100729051	11	14	5.39638e-08
chrX	139977550	139978601	11	18	5.39638e-08
chrX	163240900	163241851	7	14	0.00443628

## Sheet: Suppl. Table 4
Limb p300 Peaks (mm9)
Chromosome	Start	End	Maximum Peak Height	Total Overlapping Reads	FDR
chr1	11017025	11017401	6	6	0.00573824
chr1	11734825	11735326	7	7	0.000434787
chr1	12605475	12606176	11	15	2.29415e-09
chr1	12680375	12681376	10	18	5.9333e-08
chr1	13416275	13416776	7	8	0.000434787
chr1	13850975	13851726	8	12	2.63397e-05
chr1	16239075	16239476	7	7	0.000434787
chr1	24202950	24203501	12	13	<1.0E-10
chr1	24247025	24247776	7	10	0.000434787
chr1	24317000	24317926	6	10	0.00573824
chr1	24619125	24620251	12	25	<1.0E-10
chr1	34047600	34048426	13	16	<1.0E-10
chr1	35932075	35932501	6	7	0.00573824
chr1	36073875	36074376	6	7	0.00573824
chr1	36121625	36122026	6	7	0.00573824
chr1	38569125	38569776	9	13	1.34833e-06
chr1	38699200	38700076	7	13	0.000434787
chr1	38814425	38815151	14	20	<1.0E-10
chr1	40409775	40410326	8	10	2.63397e-05
chr1	40797450	40797926	7	8	0.000434787
chr1	42596475	42597751	9	21	1.34833e-06
chr1	43501875	43502576	6	9	0.00573824
chr1	44736000	44736551	9	11	1.34833e-06
chr1	45824125	45824551	7	7	0.000434787
chr1	46886875	46887376	6	7	0.00573824
chr1	46910250	46910676	6	6	0.00573824
chr1	51029300	51029776	7	8	0.000434787
chr1	52363600	52364201	6	9	0.00573824
chr1	52709575	52710251	6	8	0.00573824
chr1	56053925	56054726	6	9	0.00573824
chr1	57262500	57262876	6	6	0.00573824
chr1	59326875	59327401	6	7	0.00573824
chr1	59379025	59379626	7	9	0.000434787
chr1	59538100	59538576	6	8	0.00573824
chr1	59573025	59573401	7	7	0.000434787
chr1	61354850	61355301	6	7	0.00573824
chr1	61357725	61360026	12	45	<1.0E-10
chr1	61974750	61975426	14	18	<1.0E-10
chr1	62237025	62237476	6	7	0.00573824
chr1	62429600	62430101	8	9	2.63397e-05
chr1	62691275	62691951	8	11	2.63397e-05
chr1	64113400	64113976	6	8	0.00573824
chr1	64211025	64211501	8	9	2.63397e-05
chr1	66297950	66298401	6	7	0.00573824
chr1	66643700	66644526	7	11	0.000434787
chr1	67034100	67034576	6	7	0.00573824
chr1	71156125	71157051	8	15	2.63397e-05
chr1	72356200	72356976	9	13	1.34833e-06
chr1	73298400	73298976	7	10	0.000434787
chr1	73410200	73410776	6	9	0.00573824
chr1	73749000	73749501	7	9	0.000434787
chr1	73802250	73802901	7	9	0.000434787
chr1	73805100	73805951	7	11	0.000434787
chr1	75475475	75476176	6	9	0.00573824
chr1	75664050	75664576	6	7	0.00573824
chr1	75769425	75770151	16	22	<1.0E-10
chr1	75782700	75783176	8	9	2.63397e-05
chr1	75979625	75980951	9	23	1.34833e-06
chr1	76279925	76280401	6	7	0.00573824
chr1	77008625	77009351	6	10	0.00573824
chr1	81741000	81741801	8	15	2.63397e-05
chr1	82199075	82199826	7	11	0.000434787
chr1	82287875	82288451	6	8	0.00573824
chr1	82357500	82358051	7	9	0.000434787
chr1	82473450	82473826	6	6	0.00573824
chr1	84545925	84546926	8	14	2.63397e-05
chr1	88139675	88140226	6	6	0.00573824
chr1	88196650	88197151	8	8	2.63397e-05
chr1	88330800	88331401	13	16	<1.0E-10
chr1	89743425	89744276	7	13	0.000434787
chr1	92015625	92016476	6	11	0.00573824
chr1	92793500	92794176	7	10	0.000434787
chr1	94267975	94268651	9	13	1.34833e-06
chr1	94687825	94688351	6	8	0.00573824
chr1	95117125	95117776	6	9	0.00573824
chr1	106985450	106985951	7	8	0.000434787
chr1	108494300	108494826	8	10	2.63397e-05
chr1	120721925	120722576	15	20	<1.0E-10
chr1	120722675	120723926	7	16	0.000434787
chr1	120798700	120799126	9	10	1.34833e-06
chr1	120948725	120949351	6	9	0.00573824
chr1	120950325	120950876	8	10	2.63397e-05
chr1	121353175	121353826	8	10	2.63397e-05
chr1	133274925	133275476	8	10	2.63397e-05
chr1	133421625	133422176	6	8	0.00573824
chr1	135638425	135639351	8	16	2.63397e-05
chr1	135659325	135659976	6	10	0.00573824
chr1	135837975	135838476	7	8	0.000434787
chr1	135963625	135964301	7	11	0.000434787
chr1	137023275	137023751	7	7	0.000434787
chr1	137556050	137556576	7	7	0.000434787
chr1	138625050	138625451	6	6	0.00573824
chr1	139270075	139270701	7	9	0.000434787
chr1	139796550	139797576	6	14	0.00573824
chr1	140241575	140242201	7	9	0.000434787
chr1	140302150	140303151	10	16	5.9333e-08
chr1	140317550	140318076	6	7	0.00573824
chr1	152440675	152441176	8	8	2.63397e-05
chr1	153533000	153533351	6	6	0.00573824
chr1	155488800	155489301	6	8	0.00573824
chr1	156930300	156931076	6	12	0.00573824
chr1	157059675	157060451	6	9	0.00573824
chr1	158684525	158685251	7	11	0.000434787
chr1	158690925	158691476	10	12	5.9333e-08
chr1	163913825	163915176	12	29	<1.0E-10
chr1	163929850	163930726	7	11	0.000434787
chr1	163934450	163934901	6	7	0.00573824
chr1	163944900	163946301	11	28	2.29415e-09
chr1	163946525	163948101	15	33	<1.0E-10
chr1	163950325	163951151	9	15	1.34833e-06
chr1	163953900	163954626	6	10	0.00573824
chr1	163966200	163967801	6	23	0.00573824
chr1	164004800	164005551	6	10	0.00573824
chr1	164056575	164056976	6	7	0.00573824
chr1	164116775	164118176	6	18	0.00573824
chr1	164146625	164148276	10	30	5.9333e-08
chr1	164211625	164212626	6	11	0.00573824
chr1	164761825	164763051	7	14	0.000434787
chr1	165287975	165288901	6	12	0.00573824
chr1	165391200	165391801	7	9	0.000434787
chr1	165504925	165505301	6	6	0.00573824
chr1	165588250	165589126	7	13	0.000434787
chr1	165612925	165613651	6	10	0.00573824
chr1	165687325	165688026	7	10	0.000434787
chr1	165774000	165774651	7	10	0.000434787
chr1	165782900	165783751	6	12	0.00573824
chr1	165828000	165828801	11	15	2.29415e-09
chr1	167625350	167625926	7	9	0.000434787
chr1	167764450	167764926	7	8	0.000434787
chr1	169214375	169214776	6	6	0.00573824
chr1	172041025	172041551	7	8	0.000434787
chr1	173210900	173211726	7	11	0.000434787
chr1	173470750	173471351	8	11	2.63397e-05
chr1	173492575	173493226	7	10	0.000434787
chr1	174231225	174231676	6	7	0.00573824
chr1	180480650	180481076	8	8	2.63397e-05
chr1	180498825	180499651	7	12	0.000434787
chr1	180658175	180659101	9	17	1.34833e-06
chr1	180662800	180663651	11	20	2.29415e-09
chr1	180800100	180801476	10	24	5.9333e-08
chr1	180991975	180992451	8	9	2.63397e-05
chr1	181127425	181129076	6	19	0.00573824
chr1	181225750	181226301	6	8	0.00573824
chr1	181360150	181360601	7	8	0.000434787
chr1	181511650	181512301	6	9	0.00573824
chr1	182064125	182064551	6	6	0.00573824
chr1	182215750	182216501	6	10	0.00573824
chr1	186068100	186068651	7	9	0.000434787
chr1	186177825	186178576	10	14	5.9333e-08
chr1	190550575	190551376	7	13	0.000434787
chr1	191746750	191747276	6	7	0.00573824
chr1	194621950	194622676	6	10	0.00573824
chr1	194626100	194626476	6	6	0.00573824
chr1	194661125	194661776	11	13	2.29415e-09
chr10	5111200	5111551	6	6	0.00573824
chr10	7387275	7387651	6	7	0.00573824
chr10	7943650	7944376	6	10	0.00573824
chr10	8550150	8550926	9	15	1.34833e-06
chr10	8573150	8573951	6	11	0.00573824
chr10	10574125	10574701	7	9	0.000434787
chr10	16727700	16728176	6	6	0.00573824
chr10	16794200	16795276	10	19	5.9333e-08
chr10	16820450	16821151	6	9	0.00573824
chr10	16933075	16933501	7	7	0.000434787
chr10	17447225	17448026	7	11	0.000434787
chr10	18824725	18825526	8	13	2.63397e-05
chr10	19924400	19924901	6	7	0.00573824
chr10	21308225	21308951	8	11	2.63397e-05
chr10	23252050	23252876	8	14	2.63397e-05
chr10	23430325	23431126	9	13	1.34833e-06
chr10	23431625	23432126	8	9	2.63397e-05
chr10	24646675	24647351	6	11	0.00573824
chr10	25091550	25092301	6	9	0.00573824
chr10	25105475	25106051	7	9	0.000434787
chr10	27316950	27317501	6	6	0.00573824
chr10	29444925	29446151	8	16	2.63397e-05
chr10	30047300	30048626	8	19	2.63397e-05
chr10	31019975	31020501	6	7	0.00573824
chr10	36204475	36205276	12	21	<1.0E-10
chr10	36860425	36861226	7	12	0.000434787
chr10	37117450	37117951	6	8	0.00573824
chr10	39379600	39380151	6	8	0.00573824
chr10	41776725	41777226	6	8	0.00573824
chr10	42817250	42818076	6	10	0.00573824
chr10	43159325	43159776	8	9	2.63397e-05
chr10	43442025	43443426	15	28	<1.0E-10
chr10	44859750	44861151	21	45	<1.0E-10
chr10	44949700	44950351	7	10	0.000434787
chr10	45533650	45534326	7	10	0.000434787
chr10	45613575	45614426	16	24	<1.0E-10
chr10	56612725	56613651	7	13	0.000434787
chr10	56699500	56700126	6	8	0.00573824
chr10	56760075	56760576	7	8	0.000434787
chr10	59365175	59365926	6	8	0.00573824
chr10	59414450	59415326	9	17	1.34833e-06
chr10	66429300	66429876	8	11	2.63397e-05
chr10	66466800	66467901	7	17	0.000434787
chr10	67818375	67818851	6	8	0.00573824
chr10	67819375	67819976	7	10	0.000434787
chr10	68715850	68716451	7	10	0.000434787
chr10	68776600	68777276	8	11	2.63397e-05
chr10	68814825	68815526	6	9	0.00573824
chr10	69046425	69047451	6	12	0.00573824
chr10	72330175	72331276	7	13	0.000434787
chr10	76949550	76950026	7	8	0.000434787
chr10	79117425	79118301	15	21	<1.0E-10
chr10	79315500	79316001	7	8	0.000434787
chr10	79391250	79392051	6	10	0.00573824
chr10	79395425	79395801	6	7	0.00573824
chr10	80118700	80119076	6	6	0.00573824
chr10	82505175	82505976	13	21	<1.0E-10
chr10	82597375	82598151	9	12	1.34833e-06
chr10	83635825	83636251	6	6	0.00573824
chr10	83875875	83876326	6	7	0.00573824
chr10	83903200	83904026	6	12	0.00573824
chr10	85757575	85758601	6	13	0.00573824
chr10	85888350	85888826	6	7	0.00573824
chr10	87331425	87332151	8	14	2.63397e-05
chr10	90644100	90644601	7	7	0.000434787
chr10	90685025	90685801	10	15	5.9333e-08
chr10	90692250	90692676	6	7	0.00573824
chr10	90704025	90704951	6	13	0.00573824
chr10	92019800	92020451	6	8	0.00573824
chr10	95170575	95171626	7	16	0.000434787
chr10	95192425	95193051	7	10	0.000434787
chr10	96509825	96510676	10	19	5.9333e-08
chr10	98725325	98726051	9	15	1.34833e-06
chr10	98731125	98732051	8	18	2.63397e-05
chr10	98761275	98762376	12	18	<1.0E-10
chr10	98821875	98822451	6	8	0.00573824
chr10	98852750	98854126	6	15	0.00573824
chr10	99211425	99211926	6	7	0.00573824
chr10	99274825	99275426	9	12	1.34833e-06
chr10	103832850	103833251	6	6	0.00573824
chr10	110231825	110232201	7	8	0.000434787
chr10	114957125	114957601	6	6	0.00573824
chr10	115807825	115808676	15	25	<1.0E-10
chr10	117020475	117021376	8	15	2.63397e-05
chr10	117106925	117107701	6	10	0.00573824
chr10	117558875	117559426	6	8	0.00573824
chr10	119198900	119199401	10	11	5.9333e-08
chr10	119684350	119684876	8	10	2.63397e-05
chr10	119870475	119871026	6	8	0.00573824
chr10	120309100	120309951	16	27	<1.0E-10
chr10	120665250	120666051	8	17	2.63397e-05
chr10	120680575	120681201	6	9	0.00573824
chr10	120942425	120942726	6	6	0.00573824
chr10	121722650	121723051	6	6	0.00573824
chr10	122195300	122195901	7	11	0.000434787
chr10	122206000	122206576	9	11	1.34833e-06
chr10	125223925	125224476	6	8	0.00573824
chr10	125246800	125247551	19	26	<1.0E-10
chr10	125359200	125359851	9	12	1.34833e-06
chr10	125404550	125405251	7	12	0.000434787
chr10	125406125	125406726	7	10	0.000434787
chr10	125406975	125408201	6	16	0.00573824
chr10	125626025	125626526	7	8	0.000434787
chr10	126415625	126416001	7	8	0.000434787
chr10	127533750	127534176	6	6	0.00573824
chr10	128216525	128216926	6	6	0.00573824
chr11	3266375	3267126	6	9	0.00573824
chr11	3439000	3439676	8	11	2.63397e-05
chr11	5197175	5197551	6	6	0.00573824
chr11	7114225	7114551	6	6	0.00573824
chr11	8559000	8559551	8	10	2.63397e-05
chr11	8684775	8685201	6	6	0.00573824
chr11	11708975	11709751	7	12	0.000434787
chr11	11755050	11755451	6	7	0.00573824
chr11	11778550	11779251	6	10	0.00573824
chr11	11837300	11837801	7	9	0.000434787
chr11	18351225	18351626	6	6	0.00573824
chr11	18816325	18817176	9	12	1.34833e-06
chr11	23972100	23972551	7	8	0.000434787
chr11	24530475	24530876	7	7	0.000434787
chr11	24650250	24650601	7	7	0.000434787
chr11	24872300	24872826	7	9	0.000434787
chr11	24999800	25000451	20	22	<1.0E-10
chr11	26110350	26110776	6	6	0.00573824
chr11	26389425	26390626	8	19	2.63397e-05
chr11	32825650	32826076	7	7	0.000434787
chr11	32904975	32905976	10	18	5.9333e-08
chr11	32977950	32978676	6	10	0.00573824
chr11	33012425	33012776	6	6	0.00573824
chr11	34868775	34869326	9	10	1.34833e-06
chr11	35183900	35184526	6	9	0.00573824
chr11	35283325	35283876	7	9	0.000434787
chr11	40207550	40209151	6	19	0.00573824
chr11	44950275	44950601	6	7	0.00573824
chr11	45202900	45203526	10	14	5.9333e-08
chr11	45254750	45255126	7	8	0.000434787
chr11	45270175	45270726	8	9	2.63397e-05
chr11	45299075	45299901	7	13	0.000434787
chr11	45363500	45364901	25	44	<1.0E-10
chr11	45405900	45407301	10	24	5.9333e-08
chr11	45491925	45492451	8	8	2.63397e-05
chr11	45651875	45652701	6	11	0.00573824
chr11	46174675	46175476	6	9	0.00573824
chr11	52173825	52174476	6	8	0.00573824
chr11	53871750	53872226	8	8	2.63397e-05
chr11	53873450	53874326	19	23	<1.0E-10
chr11	53940075	53941026	13	24	<1.0E-10
chr11	55332775	55333076	6	6	0.00573824
chr11	60709425	60709876	8	8	2.63397e-05
chr11	60962275	60962676	6	6	0.00573824
chr11	61297825	61299051	7	17	0.000434787
chr11	63252875	63253426	6	8	0.00573824
chr11	63478800	63479301	8	9	2.63397e-05
chr11	63663500	63664176	10	13	5.9333e-08
chr11	64614250	64614701	7	8	0.000434787
chr11	64646625	64647876	13	21	<1.0E-10
chr11	64713175	64714051	10	16	5.9333e-08
chr11	67876200	67876801	7	10	0.000434787
chr11	68009275	68009751	6	7	0.00573824
chr11	68451100	68452501	16	32	<1.0E-10
chr11	68933125	68933426	6	6	0.00573824
chr11	69231925	69232726	7	10	0.000434787
chr11	69359950	69360626	6	9	0.00573824
chr11	69883325	69884126	11	16	2.29415e-09
chr11	74863200	74863726	12	13	<1.0E-10
chr11	74960600	74961451	10	18	5.9333e-08
chr11	75354225	75354751	6	8	0.00573824
chr11	75385100	75386001	7	12	0.000434787
chr11	75750950	75751751	7	12	0.000434787
chr11	76137850	76138401	6	8	0.00573824
chr11	76243500	76243801	6	6	0.00573824
chr11	76290500	76290951	6	7	0.00573824
chr11	77977200	77977651	9	10	1.34833e-06
chr11	78001900	78002576	7	10	0.000434787
chr11	79483425	79484001	6	8	0.00573824
chr11	79619550	79620101	8	9	2.63397e-05
chr11	81130725	81131126	6	6	0.00573824
chr11	81262750	81263076	6	6	0.00573824
chr11	82648800	82649276	7	8	0.000434787
chr11	84521825	84522376	8	10	2.63397e-05
chr11	85445875	85446701	10	16	5.9333e-08
chr11	85526325	85526751	7	8	0.000434787
chr11	85527625	85528851	8	17	2.63397e-05
chr11	85552950	85553351	6	7	0.00573824
chr11	85689025	85690676	12	26	<1.0E-10
chr11	86383475	86384401	8	16	2.63397e-05
chr11	86782450	86782951	6	7	0.00573824
chr11	86940450	86940851	6	6	0.00573824
chr11	87974575	87975226	7	11	0.000434787
chr11	88268200	88269376	29	45	<1.0E-10
chr11	88551275	88552176	6	13	0.00573824
chr11	88555275	88555776	8	10	2.63397e-05
chr11	88758800	88759201	6	6	0.00573824
chr11	94021750	94022201	7	7	0.000434787
chr11	95539500	95539826	7	7	0.000434787
chr11	96180400	96180826	6	6	0.00573824
chr11	97048950	97049451	6	6	0.00573824
chr11	97490475	97490926	6	7	0.00573824
chr11	97738625	97739226	9	12	1.34833e-06
chr11	97793500	97794051	7	7	0.000434787
chr11	98359075	98359526	6	7	0.00573824
chr11	98601775	98602251	6	7	0.00573824
chr11	98803400	98803901	6	7	0.00573824
chr11	98933025	98934051	7	15	0.000434787
chr11	99008625	99009701	6	14	0.00573824
chr11	99312225	99312651	6	6	0.00573824
chr11	101031900	101032351	6	6	0.00573824
chr11	102464200	102465901	6	19	0.00573824
chr11	102485275	102486126	12	18	<1.0E-10
chr11	105014750	105015526	6	9	0.00573824
chr11	105153750	105154776	8	17	2.63397e-05
chr11	105927725	105928401	8	11	2.63397e-05
chr11	107330500	107330951	7	8	0.000434787
chr11	108076825	108077176	6	7	0.00573824
chr11	108619050	108619901	6	11	0.00573824
chr11	109130825	109131776	20	37	<1.0E-10
chr11	109763900	109764426	8	10	2.63397e-05
chr11	110510525	110511626	10	18	5.9333e-08
chr11	110528975	110529401	6	7	0.00573824
chr11	111160675	111161376	6	11	0.00573824
chr11	111689775	111690326	9	11	1.34833e-06
chr11	111822750	111823701	10	15	5.9333e-08
chr11	111825350	111825776	6	7	0.00573824
chr11	111889500	111889926	8	9	2.63397e-05
chr11	112086375	112086851	6	7	0.00573824
chr11	112273800	112274301	8	9	2.63397e-05
chr11	112875075	112876426	8	22	2.63397e-05
chr11	113045325	113045726	6	7	0.00573824
chr11	113646875	113647401	10	11	5.9333e-08
chr11	114059450	114060076	9	12	1.34833e-06
chr11	114100450	114101001	8	9	2.63397e-05
chr11	114691125	114691701	9	12	1.34833e-06
chr11	116279350	116279826	8	9	2.63397e-05
chr11	116896675	116897651	6	12	0.00573824
chr11	117127025	117127626	6	8	0.00573824
chr11	119090150	119091101	6	13	0.00573824
chr11	119976050	119976551	6	7	0.00573824
chr11	120051275	120051901	6	9	0.00573824
chr11	120092600	120093001	6	6	0.00573824
chr11	120094625	120095151	7	9	0.000434787
chr11	120098600	120099401	6	11	0.00573824
chr11	120102050	120102851	6	11	0.00573824
chr11	120568550	120568851	6	6	0.00573824
chr11	120851975	120852476	6	8	0.00573824
chr12	3843100	3843776	6	9	0.00573824
chr12	7618125	7618826	6	10	0.00573824
chr12	8805375	8805726	6	6	0.00573824
chr12	8853875	8854626	6	12	0.00573824
chr12	9265050	9265751	9	12	1.34833e-06
chr12	9345500	9346226	6	10	0.00573824
chr12	9347425	9348026	6	8	0.00573824
chr12	9757975	9758626	8	12	2.63397e-05
chr12	12408250	12408651	6	6	0.00573824
chr12	12515875	12516401	11	13	2.29415e-09
chr12	13050525	13050851	7	7	0.000434787
chr12	13054900	13055301	6	6	0.00573824
chr12	13191125	13192101	12	21	<1.0E-10
chr12	13605150	13606151	6	12	0.00573824
chr12	16060475	16060951	7	8	0.000434787
chr12	16806475	16807026	7	9	0.000434787
chr12	25777575	25778026	8	8	2.63397e-05
chr12	25779375	25780051	7	11	0.000434787
chr12	25782850	25784926	12	42	<1.0E-10
chr12	26218550	26219376	8	16	2.63397e-05
chr12	27661375	27661901	6	7	0.00573824
chr12	27867200	27867801	7	9	0.000434787
chr12	27871925	27872951	9	19	1.34833e-06
chr12	28095375	28095701	7	7	0.000434787
chr12	28150275	28151601	12	26	<1.0E-10
chr12	28248625	28249226	12	15	<1.0E-10
chr12	28260500	28261151	12	18	<1.0E-10
chr12	29484525	29485251	7	12	0.000434787
chr12	30382775	30383351	6	8	0.00573824
chr12	30977650	30978201	6	8	0.00573824
chr12	31195750	31196301	7	8	0.000434787
chr12	31711350	31711876	7	8	0.000434787
chr12	34416825	34417251	6	8	0.00573824
chr12	34884900	34885401	10	11	5.9333e-08
chr12	34900325	34901151	9	14	1.34833e-06
chr12	34904950	34905851	7	11	0.000434787
chr12	35278700	35279651	7	14	0.000434787
chr12	35289225	35289826	7	9	0.000434787
chr12	35476650	35477301	8	11	2.63397e-05
chr12	35508225	35508776	7	9	0.000434787
chr12	37517250	37517976	8	14	2.63397e-05
chr12	37519975	37521426	11	27	2.29415e-09
chr12	41428950	41429326	6	6	0.00573824
chr12	54724775	54725526	6	9	0.00573824
chr12	54764925	54765551	12	16	<1.0E-10
chr12	54947175	54947726	7	9	0.000434787
chr12	57770475	57771001	8	9	2.63397e-05
chr12	57819525	57819926	6	7	0.00573824
chr12	58052625	58053126	6	6	0.00573824
chr12	68224750	68225351	7	10	0.000434787
chr12	70260275	70260776	7	8	0.000434787
chr12	72398050	72398401	6	6	0.00573824
chr12	74077150	74077976	6	11	0.00573824
chr12	74346825	74347301	6	7	0.00573824
chr12	74387625	74388051	6	6	0.00573824
chr12	74442975	74443401	6	7	0.00573824
chr12	74469225	74469701	6	8	0.00573824
chr12	74471575	74472026	6	7	0.00573824
chr12	74561425	74561851	6	7	0.00573824
chr12	74612300	74613176	6	11	0.00573824
chr12	74622025	74623451	7	21	0.000434787
chr12	79304750	79305176	6	6	0.00573824
chr12	80607300	80608776	17	32	<1.0E-10
chr12	80762100	80762876	6	10	0.00573824
chr12	80830850	80831426	6	9	0.00573824
chr12	80947200	80948451	7	18	0.000434787
chr12	81121950	81122376	7	8	0.000434787
chr12	81213750	81214601	6	11	0.00573824
chr12	81330925	81331726	10	18	5.9333e-08
chr12	84173875	84174501	6	10	0.00573824
chr12	84790200	84790676	6	8	0.00573824
chr12	86715650	86716176	6	8	0.00573824
chr12	86795825	86797151	17	39	<1.0E-10
chr12	86812950	86813526	7	10	0.000434787
chr12	86827625	86828001	6	6	0.00573824
chr12	87514300	87514701	9	9	1.34833e-06
chr12	88142025	88142526	6	7	0.00573824
chr12	88143075	88143726	8	13	2.63397e-05
chr12	88225475	88226301	6	13	0.00573824
chr12	90769150	90769876	6	10	0.00573824
chr12	99865525	99866151	6	9	0.00573824
chr12	101366250	101367201	8	14	2.63397e-05
chr12	101520550	101520976	6	7	0.00573824
chr12	102228375	102229051	6	10	0.00573824
chr12	105831200	105832126	13	20	<1.0E-10
chr12	105862325	105862776	6	6	0.00573824
chr12	106007225	106008051	9	14	1.34833e-06
chr12	106052175	106053201	9	17	1.34833e-06
chr12	106060300	106060751	8	8	2.63397e-05
chr12	106139200	106140151	14	26	<1.0E-10
chr12	106177650	106178051	7	8	0.000434787
chr12	106693375	106693876	9	10	1.34833e-06
chr12	107309550	107310351	6	9	0.00573824
chr12	108350275	108350876	7	10	0.000434787
chr12	110030375	110030851	6	7	0.00573824
chr12	110791275	110791901	8	11	2.63397e-05
chr12	110987900	110988476	6	8	0.00573824
chr12	113176700	113177201	6	6	0.00573824
chr13	3694300	3694776	6	8	0.00573824
chr13	3708225	3708876	6	11	0.00573824
chr13	3711700	3712476	8	14	2.63397e-05
chr13	4770675	4771376	6	10	0.00573824
chr13	6200750	6201251	7	8	0.000434787
chr13	8707750	8708176	6	6	0.00573824
chr13	14927700	14928201	6	7	0.00573824
chr13	15145100	15145776	7	10	0.000434787
chr13	22141725	22142151	6	6	0.00573824
chr13	24159600	24159926	6	6	0.00573824
chr13	25278700	25279251	6	8	0.00573824
chr13	26650075	26650651	6	8	0.00573824
chr13	26656875	26657251	6	6	0.00573824
chr13	28500000	28501376	8	21	2.63397e-05
chr13	28636075	28636701	7	9	0.000434787
chr13	28782075	28783026	19	30	<1.0E-10
chr13	29508450	29509451	7	13	0.000434787
chr13	31945250	31945551	6	6	0.00573824
chr13	32062650	32063351	8	13	2.63397e-05
chr13	32084850	32085501	6	9	0.00573824
chr13	32584625	32584926	6	6	0.00573824
chr13	32610350	32611151	7	13	0.000434787
chr13	37720875	37721301	7	8	0.000434787
chr13	39503400	39503951	7	8	0.000434787
chr13	40670700	40671351	6	9	0.00573824
chr13	41793625	41794001	6	6	0.00573824
chr13	43913800	43914401	7	9	0.000434787
chr13	44025800	44026876	6	16	0.00573824
chr13	44054000	44054376	6	6	0.00573824
chr13	44121925	44122526	6	9	0.00573824
chr13	44327125	44327976	8	14	2.63397e-05
chr13	44514825	44515926	7	15	0.000434787
chr13	44591800	44592151	6	7	0.00573824
chr13	44731175	44731676	6	8	0.00573824
chr13	44891100	44891826	7	11	0.000434787
chr13	45509450	45509926	7	8	0.000434787
chr13	48360300	48360826	6	6	0.00573824
chr13	48701225	48701726	7	8	0.000434787
chr13	51230225	51230651	6	7	0.00573824
chr13	51316475	51317151	7	10	0.000434787
chr13	51354150	51355126	21	37	<1.0E-10
chr13	51374800	51375776	13	22	<1.0E-10
chr13	51409825	51410926	10	19	5.9333e-08
chr13	51698650	51699376	8	12	2.63397e-05
chr13	52015675	52016626	8	15	2.63397e-05
chr13	53405050	53405576	8	10	2.63397e-05
chr13	53571300	53571976	6	9	0.00573824
chr13	54088200	54088801	7	11	0.000434787
chr13	54795125	54795726	6	8	0.00573824
chr13	56180275	56180926	6	10	0.00573824
chr13	56240625	56240951	6	6	0.00573824
chr13	56260575	56262151	10	27	5.9333e-08
chr13	56322925	56323326	6	6	0.00573824
chr13	56390500	56390976	9	9	1.34833e-06
chr13	56423000	56423376	6	6	0.00573824
chr13	56452050	56452476	6	7	0.00573824
chr13	56482250	56483051	9	12	1.34833e-06
chr13	56683250	56684201	12	20	<1.0E-10
chr13	56718875	56719376	6	7	0.00573824
chr13	58159025	58160451	10	29	5.9333e-08
chr13	58758200	58758726	6	7	0.00573824
chr13	59072750	59073351	6	8	0.00573824
chr13	59554400	59555276	7	11	0.000434787
chr13	60097650	60098176	6	7	0.00573824
chr13	60109150	60109626	8	10	2.63397e-05
chr13	60121200	60121951	9	13	1.34833e-06
chr13	60159025	60159401	6	6	0.00573824
chr13	60211575	60212326	6	9	0.00573824
chr13	60278475	60279626	7	17	0.000434787
chr13	60327825	60328151	6	7	0.00573824
chr13	60368400	60370326	20	39	<1.0E-10
chr13	60510875	60511851	8	17	2.63397e-05
chr13	60541800	60542501	7	11	0.000434787
chr13	62966875	62967601	6	9	0.00573824
chr13	63094850	63095601	6	11	0.00573824
chr13	63272675	63273251	6	9	0.00573824
chr13	63340600	63341051	6	7	0.00573824
chr13	63626100	63627051	6	11	0.00573824
chr13	63629700	63630526	6	10	0.00573824
chr13	63662850	63663201	6	7	0.00573824
chr13	63667250	63667901	8	12	2.63397e-05
chr13	63674450	63674976	7	9	0.000434787
chr13	63728450	63728976	7	9	0.000434787
chr13	63984775	63985426	7	9	0.000434787
chr13	64019550	64020626	6	15	0.00573824
chr13	64306475	64306926	6	6	0.00573824
chr13	64336300	64336876	6	9	0.00573824
chr13	70421650	70422501	6	12	0.00573824
chr13	70614200	70614576	6	6	0.00573824
chr13	71871750	71872451	6	10	0.00573824
chr13	72736000	72736426	6	6	0.00573824
chr13	73971125	73971801	17	23	<1.0E-10
chr13	89865925	89866426	8	9	2.63397e-05
chr13	90560425	90560976	7	9	0.000434787
chr13	90901575	90902276	7	11	0.000434787
chr13	91062400	91062801	6	7	0.00573824
chr13	91326875	91327626	16	26	<1.0E-10
chr13	91510075	91511126	8	18	2.63397e-05
chr13	91599625	91601001	6	16	0.00573824
chr13	94608150	94609651	10	28	5.9333e-08
chr13	95055575	95056076	6	7	0.00573824
chr13	95378250	95379051	11	17	2.29415e-09
chr13	96576825	96577326	6	6	0.00573824
chr13	98346975	98348126	6	13	0.00573824
chr13	98554825	98556076	16	31	<1.0E-10
chr13	98709600	98710076	6	7	0.00573824
chr13	99696025	99696551	7	8	0.000434787
chr13	100183250	100184426	8	21	2.63397e-05
chr13	100307600	100308551	6	14	0.00573824
chr13	100550500	100551626	8	18	2.63397e-05
chr13	100560500	100561251	9	15	1.34833e-06
chr13	101986025	101986551	6	7	0.00573824
chr13	104813375	104813776	7	8	0.000434787
chr13	105366250	105366751	7	8	0.000434787
chr13	108585650	108586226	7	10	0.000434787
chr13	108621300	108621801	6	7	0.00573824
chr13	112744050	112744351	6	6	0.00573824
chr13	112853850	112854426	6	8	0.00573824
chr13	113233000	113233601	6	8	0.00573824
chr13	114949700	114950151	8	9	2.63397e-05
chr13	116001500	116002026	6	7	0.00573824
chr13	120276325	120276701	8	9	2.63397e-05
chr14	8729200	8729851	11	14	2.29415e-09
chr14	9168050	9168751	6	9	0.00573824
chr14	12858425	12859126	8	11	2.63397e-05
chr14	14603175	14603826	11	15	2.29415e-09
chr14	17160875	17161526	9	13	1.34833e-06
chr14	17386825	17387701	8	14	2.63397e-05
chr14	17566150	17566626	8	9	2.63397e-05
chr14	20569125	20570001	6	12	0.00573824
chr14	22071400	22072076	13	17	<1.0E-10
chr14	22107050	22107801	8	14	2.63397e-05
chr14	22261025	22261526	8	9	2.63397e-05
chr14	22281175	22282276	9	18	1.34833e-06
chr14	22504000	22504576	6	8	0.00573824
chr14	22685575	22686126	10	12	5.9333e-08
chr14	22868100	22868601	7	8	0.000434787
chr14	22912200	22912901	6	8	0.00573824
chr14	23173775	23174401	6	8	0.00573824
chr14	23261000	23261551	8	9	2.63397e-05
chr14	23410275	23410776	10	11	5.9333e-08
chr14	23527325	23527951	8	10	2.63397e-05
chr14	23834350	23835426	12	24	<1.0E-10
chr14	24204850	24205376	6	7	0.00573824
chr14	24270800	24271326	9	10	1.34833e-06
chr14	24361250	24361851	7	11	0.000434787
chr14	24385100	24385601	8	8	2.63397e-05
chr14	25081825	25082826	18	25	<1.0E-10
chr14	25719750	25720651	7	12	0.000434787
chr14	25801825	25802601	7	12	0.000434787
chr14	25805050	25805976	19	32	<1.0E-10
chr14	25861700	25862601	8	13	2.63397e-05
chr14	25864075	25864751	6	9	0.00573824
chr14	26016300	26016826	8	9	2.63397e-05
chr14	27879500	27880151	9	14	1.34833e-06
chr14	27882650	27883301	6	9	0.00573824
chr14	27964525	27965251	12	15	<1.0E-10
chr14	28165025	28165501	7	8	0.000434787
chr14	28180225	28181051	12	18	<1.0E-10
chr14	28602075	28602801	6	9	0.00573824
chr14	28875075	28875451	6	6	0.00573824
chr14	28883075	28883426	6	6	0.00573824
chr14	29280975	29281726	8	13	2.63397e-05
chr14	29314375	29315126	10	14	5.9333e-08
chr14	29476725	29477676	7	13	0.000434787
chr14	29611450	29611951	6	7	0.00573824
chr14	29785450	29786401	12	20	<1.0E-10
chr14	29927100	29927651	6	7	0.00573824
chr14	32474800	32476151	6	17	0.00573824
chr14	34520825	34521651	6	11	0.00573824
chr14	46062350	46062951	6	8	0.00573824
chr14	46445575	46446026	6	6	0.00573824
chr14	46638650	46639601	7	13	0.000434787
chr14	47337725	47338601	7	11	0.000434787
chr14	47342325	47342776	6	6	0.00573824
chr14	47918325	47918876	6	7	0.00573824
chr14	52876825	52877576	7	11	0.000434787
chr14	55191975	55192326	6	6	0.00573824
chr14	55194225	55194726	6	7	0.00573824
chr14	60232900	60233451	10	10	5.9333e-08
chr14	60428525	60429251	7	11	0.000434787
chr14	61104275	61104751	6	6	0.00573824
chr14	65962600	65963101	6	7	0.00573824
chr14	66368750	66369151	6	6	0.00573824
chr14	66996800	66997601	6	10	0.00573824
chr14	68002000	68002926	6	12	0.00573824
chr14	69552775	69553351	7	10	0.000434787
chr14	70039225	70039651	8	9	2.63397e-05
chr14	70870625	70871501	7	13	0.000434787
chr14	70874150	70875001	9	15	1.34833e-06
chr14	77022350	77022951	6	9	0.00573824
chr14	77210650	77211076	6	8	0.00573824
chr14	77777150	77777651	7	8	0.000434787
chr14	79539975	79540451	6	8	0.00573824
chr14	79910275	79910851	6	9	0.00573824
chr14	80357700	80358151	6	6	0.00573824
chr14	87148625	87149276	6	9	0.00573824
chr14	94185625	94186026	6	6	0.00573824
chr14	97485850	97486351	7	7	0.000434787
chr14	100367075	100367801	6	9	0.00573824
chr14	101189550	101189951	6	6	0.00573824
chr14	101288975	101289576	7	10	0.000434787
chr14	102801600	102802101	7	8	0.000434787
chr14	102911075	102911501	6	7	0.00573824
chr14	103099675	103100201	6	8	0.00573824
chr14	103258450	103259051	7	10	0.000434787
chr14	105776450	105777301	8	13	2.63397e-05
chr14	105971525	105972276	7	12	0.000434787
chr14	110477500	110477926	6	6	0.00573824
chr14	118762600	118763026	7	7	0.000434787
chr14	118909450	118909876	6	7	0.00573824
chr14	120536925	120537201	6	6	0.00573824
chr14	120677575	120677951	6	6	0.00573824
chr14	121507175	121508126	7	15	0.000434787
chr14	121597950	121598851	6	11	0.00573824
chr14	121646500	121646976	6	8	0.00573824
chr14	122599125	122600426	6	18	0.00573824
chr14	122646375	122647126	7	10	0.000434787
chr14	122654925	122656001	9	18	1.34833e-06
chr15	6229750	6230351	7	9	0.000434787
chr15	10538425	10538851	11	11	2.29415e-09
chr15	11109550	11110051	6	7	0.00573824
chr15	11541925	11542451	6	6	0.00573824
chr15	11629475	11629901	7	8	0.000434787
chr15	11923425	11923976	6	7	0.00573824
chr15	12444875	12446201	15	29	<1.0E-10
chr15	12627475	12628726	11	25	2.29415e-09
chr15	12996675	12997401	6	9	0.00573824
chr15	15876100	15876951	6	12	0.00573824
chr15	26448975	26449451	7	8	0.000434787
chr15	26810325	26810801	6	6	0.00573824
chr15	27713550	27714576	8	17	2.63397e-05
chr15	27717150	27718351	6	15	0.00573824
chr15	27727100	27727751	7	10	0.000434787
chr15	32301175	32301501	6	6	0.00573824
chr15	35462825	35463501	9	14	1.34833e-06
chr15	36982775	36983476	9	12	1.34833e-06
chr15	42856775	42857226	6	7	0.00573824
chr15	49706000	49706651	6	10	0.00573824
chr15	50528300	50528876	6	8	0.00573824
chr15	50529625	50530501	9	17	1.34833e-06
chr15	50967525	50968201	7	10	0.000434787
chr15	51557250	51557601	7	7	0.000434787
chr15	51629800	51630776	13	27	<1.0E-10
chr15	52504550	52505576	8	16	2.63397e-05
chr15	53178650	53179301	6	8	0.00573824
chr15	55097150	55097626	6	6	0.00573824
chr15	55909200	55909676	6	6	0.00573824
chr15	55997700	55998351	17	21	<1.0E-10
chr15	57229925	57230801	9	14	1.34833e-06
chr15	57807350	57807876	7	8	0.000434787
chr15	61183125	61184076	6	11	0.00573824
chr15	63025700	63026251	8	10	2.63397e-05
chr15	75717075	75717876	6	9	0.00573824
chr15	76276925	76277601	11	14	2.29415e-09
chr15	76292200	76293151	7	15	0.000434787
chr15	76580875	76581301	6	6	0.00573824
chr15	76868100	76868651	8	10	2.63397e-05
chr15	77032650	77033226	9	11	1.34833e-06
chr15	77084800	77085551	6	10	0.00573824
chr15	78743600	78744301	6	8	0.00573824
chr15	79780775	79781451	6	9	0.00573824
chr15	83469475	83470076	14	17	<1.0E-10
chr15	83496475	83497376	7	14	0.000434787
chr15	83508275	83509401	6	15	0.00573824
chr15	84997450	84997876	8	9	2.63397e-05
chr15	85413125	85413426	7	7	0.000434787
chr15	87486775	87487626	6	12	0.00573824
chr15	93687900	93688601	6	9	0.00573824
chr15	95185425	95185826	6	6	0.00573824
chr15	96473325	96473701	6	6	0.00573824
chr15	99250775	99251501	6	13	0.00573824
chr15	100134650	100135201	6	7	0.00573824
chr15	100430450	100430876	6	7	0.00573824
chr15	100467325	100467826	7	8	0.000434787
chr15	101226850	101227201	6	6	0.00573824
chr15	102078800	102079776	9	16	1.34833e-06
chr15	102201375	102201701	6	6	0.00573824
chr15	102235400	102235901	6	6	0.00573824
chr15	102487150	102487626	6	7	0.00573824
chr15	102488050	102488601	6	8	0.00573824
chr15	102650525	102650976	6	6	0.00573824
chr15	102790150	102790701	10	11	5.9333e-08
chr15	102844750	102845326	7	9	0.000434787
chr15	103045525	103045951	6	7	0.00573824
chr15	103135175	103136126	13	24	<1.0E-10
chr16	4586900	4587276	6	6	0.00573824
chr16	4658600	4659176	6	9	0.00573824
chr16	7346100	7347076	7	12	0.000434787
chr16	7347775	7348251	6	7	0.00573824
chr16	8175050	8175351	7	8	0.000434787
chr16	10454275	10455501	10	18	5.9333e-08
chr16	13806000	13806526	6	6	0.00573824
chr16	14159500	14160276	6	9	0.00573824
chr16	15052800	15053576	25	36	<1.0E-10
chr16	15084900	15085901	7	16	0.000434787
chr16	15295225	15296051	9	14	1.34833e-06
chr16	15958575	15959076	6	7	0.00573824
chr16	16560250	16560726	6	8	0.00573824
chr16	17311125	17311401	6	6	0.00573824
chr16	17809425	17810626	6	14	0.00573824
chr16	18186150	18186551	7	8	0.000434787
chr16	21210700	21211376	10	13	5.9333e-08
chr16	21246025	21246576	6	8	0.00573824
chr16	21870025	21870451	6	7	0.00573824
chr16	25465275	25466376	8	18	2.63397e-05
chr16	25580225	25580676	6	7	0.00573824
chr16	27389150	27389526	6	7	0.00573824
chr16	29735100	29735701	7	9	0.000434787
chr16	29761700	29762426	6	10	0.00573824
chr16	29839350	29840451	9	17	1.34833e-06
chr16	29893650	29895326	14	35	<1.0E-10
chr16	29996250	29997101	6	12	0.00573824
chr16	30009025	30009451	6	7	0.00573824
chr16	30063800	30064426	7	9	0.000434787
chr16	30155900	30156501	6	8	0.00573824
chr16	30236375	30236851	8	9	2.63397e-05
chr16	30241600	30242251	6	10	0.00573824
chr16	31003950	31004601	7	12	0.000434787
chr16	33739075	33739851	6	9	0.00573824
chr16	35067300	35067701	7	7	0.000434787
chr16	36509375	36509801	6	6	0.00573824
chr16	36949550	36950076	6	7	0.00573824
chr16	41511000	41511476	8	10	2.63397e-05
chr16	42784600	42785126	6	8	0.00573824
chr16	44394450	44395151	9	12	1.34833e-06
chr16	44494975	44495351	6	6	0.00573824
chr16	44616400	44617026	8	10	2.63397e-05
chr16	44632775	44633326	6	8	0.00573824
chr16	44666525	44667051	8	9	2.63397e-05
chr16	44695300	44696701	7	18	0.000434787
chr16	45880150	45881126	6	13	0.00573824
chr16	50753875	50754376	7	9	0.000434787
chr16	50812725	50813351	6	10	0.00573824
chr16	54991700	54992576	12	19	<1.0E-10
chr16	55142725	55143626	8	16	2.63397e-05
chr16	55147775	55148526	6	10	0.00573824
chr16	55260975	55261676	8	12	2.63397e-05
chr16	55442800	55443326	8	10	2.63397e-05
chr16	57694800	57695251	9	10	1.34833e-06
chr16	62468675	62469726	13	22	<1.0E-10
chr16	63556250	63556826	8	10	2.63397e-05
chr16	63599950	63600626	6	10	0.00573824
chr16	63602275	63602751	8	9	2.63397e-05
chr16	70239525	70240276	6	9	0.00573824
chr16	72686050	72687201	8	19	2.63397e-05
chr16	72804650	72805026	6	6	0.00573824
chr16	73007650	73008276	10	13	5.9333e-08
chr16	73096325	73097951	13	32	<1.0E-10
chr16	74093700	74094126	7	8	0.000434787
chr16	74448350	74448776	10	11	5.9333e-08
chr16	74795525	74797026	7	20	0.000434787
chr16	77636700	77637126	7	7	0.000434787
chr16	85879400	85879876	6	7	0.00573824
chr16	86895300	86895726	8	8	2.63397e-05
chr16	88599925	88600876	13	23	<1.0E-10
chr16	89945075	89945626	6	8	0.00573824
chr16	90523600	90524051	9	9	1.34833e-06
chr16	91212125	91212651	6	7	0.00573824
chr16	91746350	91747076	9	13	1.34833e-06
chr16	92738500	92739351	9	13	1.34833e-06
chr16	93263275	93264051	7	11	0.000434787
chr16	93272350	93273276	8	18	2.63397e-05
chr16	94731575	94732026	9	10	1.34833e-06
chr16	96015925	96016551	6	9	0.00573824
chr16	96018250	96018876	10	12	5.9333e-08
chr16	96069425	96070651	30	47	<1.0E-10
chr17	4116225	4116501	6	6	0.00573824
chr17	4498300	4498851	6	8	0.00573824
chr17	5232900	5233626	6	10	0.00573824
chr17	10528000	10528726	6	9	0.00573824
chr17	11032825	11033301	10	11	5.9333e-08
chr17	12986425	12987701	6	15	0.00573824
chr17	13027550	13028151	6	9	0.00573824
chr17	13735625	13736226	8	11	2.63397e-05
chr17	14647425	14648001	6	9	0.00573824
chr17	15577300	15578051	6	12	0.00573824
chr17	15945275	15946676	9	24	1.34833e-06
chr17	16313925	16314651	7	10	0.000434787
chr17	17575450	17576226	8	13	2.63397e-05
chr17	17578775	17579376	6	9	0.00573824
chr17	17627850	17628851	6	13	0.00573824
chr17	17635700	17636301	6	9	0.00573824
chr17	17964600	17965376	6	11	0.00573824
chr17	24665075	24665401	6	6	0.00573824
chr17	25730725	25731301	8	10	2.63397e-05
chr17	27558850	27559826	7	15	0.000434787
chr17	27692650	27693601	6	14	0.00573824
chr17	28236025	28236526	6	8	0.00573824
chr17	28244075	28244601	6	6	0.00573824
chr17	29553025	29553651	6	9	0.00573824
chr17	29600750	29601576	6	12	0.00573824
chr17	29627100	29627651	6	8	0.00573824
chr17	36055175	36055876	6	9	0.00573824
chr17	44127825	44128801	9	16	1.34833e-06
chr17	44437650	44438226	12	15	<1.0E-10
chr17	44569375	44570126	9	12	1.34833e-06
chr17	45463175	45463851	17	22	<1.0E-10
chr17	46023575	46024101	7	7	0.000434787
chr17	46223375	46223901	8	8	2.63397e-05
chr17	46755325	46756301	11	19	2.29415e-09
chr17	48080025	48080551	6	7	0.00573824
chr17	48112350	48113201	8	14	2.63397e-05
chr17	48125600	48126876	7	16	0.000434787
chr17	48126950	48127526	7	10	0.000434787
chr17	48168200	48168901	6	10	0.00573824
chr17	48201625	48202551	8	16	2.63397e-05
chr17	48576725	48577226	8	10	2.63397e-05
chr17	49335450	49335851	6	6	0.00573824
chr17	56601875	56602901	6	13	0.00573824
chr17	56953650	56954226	12	14	<1.0E-10
chr17	59409550	59409976	6	6	0.00573824
chr17	63050500	63051101	6	8	0.00573824
chr17	63386925	63387226	6	6	0.00573824
chr17	67046125	67046501	8	8	2.63397e-05
chr17	68300350	68300651	6	6	0.00573824
chr17	68345475	68346026	6	7	0.00573824
chr17	68348800	68349876	7	15	0.000434787
chr17	70815850	70816401	8	8	2.63397e-05
chr17	71198725	71199501	7	10	0.000434787
chr17	72349025	72350176	9	17	1.34833e-06
chr17	73607925	73608426	7	9	0.000434787
chr17	75288200	75289151	10	16	5.9333e-08
chr17	76536225	76536751	7	9	0.000434787
chr17	79544250	79545051	22	34	<1.0E-10
chr17	79899925	79901026	9	16	1.34833e-06
chr17	81151700	81152301	6	10	0.00573824
chr17	81286425	81287326	6	14	0.00573824
chr17	81912750	81913351	8	11	2.63397e-05
chr17	83566300	83566851	8	10	2.63397e-05
chr17	84288750	84289551	8	12	2.63397e-05
chr17	84312825	84313851	12	22	<1.0E-10
chr17	84332900	84333701	6	9	0.00573824
chr17	84337750	84338651	7	14	0.000434787
chr17	84363875	84364526	10	13	5.9333e-08
chr17	84389850	84390226	7	7	0.000434787
chr17	84582000	84582976	7	13	0.000434787
chr17	84587325	84587826	6	7	0.00573824
chr17	84764875	84765776	9	15	1.34833e-06
chr17	86222950	86223351	6	7	0.00573824
chr17	86288975	86289301	6	6	0.00573824
chr17	86331450	86332676	7	19	0.000434787
chr17	86437000	86437376	6	7	0.00573824
chr17	87636075	87636801	6	10	0.00573824
chr18	4518450	4519001	10	12	5.9333e-08
chr18	6280550	6281001	6	6	0.00573824
chr18	7094325	7095401	7	17	0.000434787
chr18	9743250	9743626	6	6	0.00573824
chr18	10532200	10532726	6	6	0.00573824
chr18	12042050	12042326	6	6	0.00573824
chr18	12346800	12347351	6	8	0.00573824
chr18	13240175	13240526	6	6	0.00573824
chr18	13297575	13298251	6	10	0.00573824
chr18	13693825	13694226	6	6	0.00573824
chr18	14100900	14101751	10	15	5.9333e-08
chr18	14278050	14278801	7	11	0.000434787
chr18	15003100	15003951	8	15	2.63397e-05
chr18	16187000	16187776	6	9	0.00573824
chr18	25735950	25736551	11	13	2.29415e-09
chr18	25791125	25791726	6	8	0.00573824
chr18	32657975	32658451	6	7	0.00573824
chr18	34738525	34738951	6	7	0.00573824
chr18	35114050	35114651	6	9	0.00573824
chr18	36048700	36049251	6	8	0.00573824
chr18	36078850	36079301	6	7	0.00573824
chr18	38743450	38744601	6	19	0.00573824
chr18	38925700	38926276	6	8	0.00573824
chr18	38963900	38964851	8	16	2.63397e-05
chr18	47528425	47528951	6	8	0.00573824
chr18	48603625	48604501	10	16	5.9333e-08
chr18	54537650	54538201	6	8	0.00573824
chr18	54736125	54736901	8	12	2.63397e-05
chr18	54874000	54874776	6	12	0.00573824
chr18	55061150	55062476	8	20	2.63397e-05
chr18	55137975	55139201	10	21	5.9333e-08
chr18	55142650	55143301	6	8	0.00573824
chr18	55149925	55151076	8	21	2.63397e-05
chr18	55293125	55293776	7	9	0.000434787
chr18	55349250	55349951	6	10	0.00573824
chr18	55357200	55357676	6	7	0.00573824
chr18	55363300	55363726	7	8	0.000434787
chr18	55613175	55613826	9	13	1.34833e-06
chr18	55654750	55655326	7	11	0.000434787
chr18	55709275	55709801	8	10	2.63397e-05
chr18	55783450	55784376	8	16	2.63397e-05
chr18	55854350	55855076	6	10	0.00573824
chr18	55922625	55923951	7	17	0.000434787
chr18	55975225	55976526	8	22	2.63397e-05
chr18	56223025	56223676	6	9	0.00573824
chr18	56960725	56961076	6	6	0.00573824
chr18	60815750	60816551	6	12	0.00573824
chr18	60829925	60830476	11	12	2.29415e-09
chr18	60833800	60834426	8	11	2.63397e-05
chr18	61769150	61769851	13	18	<1.0E-10
chr18	62864650	62865201	7	9	0.000434787
chr18	63377925	63378276	6	6	0.00573824
chr18	65214700	65215076	6	7	0.00573824
chr18	65680125	65680901	10	14	5.9333e-08
chr18	65741200	65742101	7	13	0.000434787
chr18	66532100	66532851	6	10	0.00573824
chr18	66581050	66581926	7	15	0.000434787
chr18	68218750	68219351	8	11	2.63397e-05
chr18	69069575	69070076	6	6	0.00573824
chr18	69070225	69071326	12	21	<1.0E-10
chr18	69135825	69136651	9	16	1.34833e-06
chr18	69229425	69230101	6	9	0.00573824
chr18	69244025	69244776	6	10	0.00573824
chr18	69276925	69278126	9	20	1.34833e-06
chr18	69284525	69285826	22	42	<1.0E-10
chr18	69306725	69307151	6	6	0.00573824
chr18	69554175	69555051	8	13	2.63397e-05
chr18	69556575	69557126	7	9	0.000434787
chr18	69773350	69774501	17	37	<1.0E-10
chr18	69789850	69790326	6	6	0.00573824
chr18	75526200	75527051	7	12	0.000434787
chr18	75622050	75622801	7	12	0.000434787
chr18	76495875	76496676	7	13	0.000434787
chr18	76607800	76608501	9	13	1.34833e-06
chr18	77054525	77055176	6	8	0.00573824
chr18	78341200	78342126	14	22	<1.0E-10
chr18	78433825	78435726	21	67	<1.0E-10
chr18	78456175	78457026	11	19	2.29415e-09
chr18	78463800	78464976	13	27	<1.0E-10
chr18	78476900	78477576	6	8	0.00573824
chr18	78568375	78568726	6	6	0.00573824
chr18	78681700	78682201	6	8	0.00573824
chr18	80751525	80752101	8	11	2.63397e-05
chr18	80833675	80834226	7	8	0.000434787
chr18	82309325	82309851	7	8	0.000434787
chr18	82322875	82323351	6	7	0.00573824
chr18	83057800	83058876	7	15	0.000434787
chr18	83354425	83355476	11	22	2.29415e-09
chr18	83660800	83661201	7	7	0.000434787
chr19	5071475	5072226	13	19	<1.0E-10
chr19	5803550	5804251	6	9	0.00573824
chr19	7187725	7188551	6	10	0.00573824
chr19	7248800	7249351	7	8	0.000434787
chr19	10088475	10088801	6	6	0.00573824
chr19	15169025	15169701	6	9	0.00573824
chr19	15901600	15902626	8	18	2.63397e-05
chr19	16284125	16284651	7	8	0.000434787
chr19	17725375	17725901	9	11	1.34833e-06
chr19	18179150	18179601	6	6	0.00573824
chr19	18804975	18806126	6	13	0.00573824
chr19	22775550	22775951	6	6	0.00573824
chr19	26679075	26679776	6	9	0.00573824
chr19	27454475	27454951	7	9	0.000434787
chr19	32393825	32395051	6	15	0.00573824
chr19	32398825	32399326	6	7	0.00573824
chr19	32598525	32599251	7	11	0.000434787
chr19	34269500	34270151	7	9	0.000434787
chr19	38089975	38090476	7	8	0.000434787
chr19	40489600	40490026	10	10	5.9333e-08
chr19	41234850	41235251	7	7	0.000434787
chr19	43010950	43011726	7	12	0.000434787
chr19	43022625	43023001	7	7	0.000434787
chr19	44023025	44023801	10	16	5.9333e-08
chr19	45088150	45088476	6	6	0.00573824
chr19	45550625	45551201	7	9	0.000434787
chr19	45857725	45858251	6	7	0.00573824
chr19	47993500	47994001	6	8	0.00573824
chr19	48159275	48159901	6	8	0.00573824
chr19	53154950	53155851	10	16	5.9333e-08
chr19	55182225	55182876	6	9	0.00573824
chr19	55667775	55668351	8	11	2.63397e-05
chr19	55883900	55884651	10	17	5.9333e-08
chr19	55889325	55890201	7	14	0.000434787
chr19	56160825	56161651	7	12	0.000434787
chr19	56173925	56174976	8	19	2.63397e-05
chr19	57561500	57561851	6	6	0.00573824
chr19	57565350	57565751	6	6	0.00573824
chr19	59127075	59127576	7	8	0.000434787
chr19	59712175	59712651	6	8	0.00573824
chr19	60091650	60092526	7	14	0.000434787
chr2	3655525	3655901	6	6	0.00573824
chr2	3950625	3951001	6	6	0.00573824
chr2	4219400	4220426	14	26	<1.0E-10
chr2	4220500	4220976	6	7	0.00573824
chr2	4278100	4278576	6	7	0.00573824
chr2	4357625	4358276	6	10	0.00573824
chr2	16277175	16277576	6	7	0.00573824
chr2	16604475	16605026	8	9	2.63397e-05
chr2	17387100	17387451	6	6	0.00573824
chr2	17779800	17780376	6	7	0.00573824
chr2	17949250	17949851	6	9	0.00573824
chr2	17977025	17978576	7	18	0.000434787
chr2	21126650	21127251	9	12	1.34833e-06
chr2	25412975	25413676	6	9	0.00573824
chr2	26165050	26165701	6	8	0.00573824
chr2	26433800	26434426	6	9	0.00573824
chr2	26977325	26978501	12	24	<1.0E-10
chr2	28652875	28653776	18	27	<1.0E-10
chr2	29933150	29933676	6	6	0.00573824
chr2	30297075	30297801	12	16	<1.0E-10
chr2	30460375	30461026	6	10	0.00573824
chr2	30513400	30514276	8	16	2.63397e-05
chr2	30577475	30577926	7	7	0.000434787
chr2	30688900	30689626	6	8	0.00573824
chr2	30708250	30708851	15	17	<1.0E-10
chr2	30728175	30728576	10	10	5.9333e-08
chr2	32172625	32174401	7	27	0.000434787
chr2	32174825	32175851	13	25	<1.0E-10
chr2	33021200	33022451	6	14	0.00573824
chr2	33061225	33061801	8	10	2.63397e-05
chr2	33436450	33437126	7	9	0.000434787
chr2	33556050	33557376	16	37	<1.0E-10
chr2	34144025	34144576	6	8	0.00573824
chr2	35358800	35359301	8	8	2.63397e-05
chr2	35602900	35603301	6	7	0.00573824
chr2	37862675	37863176	6	7	0.00573824
chr2	37951650	37952451	8	13	2.63397e-05
chr2	48336900	48337476	6	8	0.00573824
chr2	49681125	49681576	8	9	2.63397e-05
chr2	49761150	49761526	6	6	0.00573824
chr2	50871325	50871951	8	12	2.63397e-05
chr2	51093750	51094851	8	20	2.63397e-05
chr2	51123250	51123751	8	8	2.63397e-05
chr2	51623250	51623801	7	9	0.000434787
chr2	51724400	51724976	6	8	0.00573824
chr2	52838025	52838676	7	9	0.000434787
chr2	57195175	57195701	6	8	0.00573824
chr2	57466875	57467301	6	7	0.00573824
chr2	57701650	57702101	6	6	0.00573824
chr2	59376175	59376601	7	7	0.000434787
chr2	59400575	59401526	16	24	<1.0E-10
chr2	59436650	59438876	12	42	<1.0E-10
chr2	64010100	64010976	6	11	0.00573824
chr2	65820025	65820551	8	8	2.63397e-05
chr2	65831325	65831951	9	13	1.34833e-06
chr2	68242400	68243151	7	12	0.000434787
chr2	71321650	71322326	6	9	0.00573824
chr2	72817450	72817826	6	6	0.00573824
chr2	73224900	73225351	6	6	0.00573824
chr2	73287925	73288401	6	6	0.00573824
chr2	73410625	73411226	6	9	0.00573824
chr2	73790300	73791476	8	19	2.63397e-05
chr2	73815750	73816076	6	6	0.00573824
chr2	73821200	73821626	6	7	0.00573824
chr2	73912650	73913501	7	12	0.000434787
chr2	73913625	73914126	9	10	1.34833e-06
chr2	74026200	74026951	6	9	0.00573824
chr2	74077575	74078251	7	11	0.000434787
chr2	74110525	74110926	7	7	0.000434787
chr2	74218350	74219501	10	21	5.9333e-08
chr2	74511700	74512326	8	12	2.63397e-05
chr2	74527400	74528276	6	10	0.00573824
chr2	74536825	74537376	7	9	0.000434787
chr2	74761450	74761826	7	7	0.000434787
chr2	74838225	74838826	7	9	0.000434787
chr2	75047100	75047976	7	15	0.000434787
chr2	75188850	75189401	6	8	0.00573824
chr2	75260750	75261476	7	11	0.000434787
chr2	75262075	75262551	6	7	0.00573824
chr2	75277650	75278376	10	15	5.9333e-08
chr2	75497575	75498176	6	9	0.00573824
chr2	75771850	75772276	7	8	0.000434787
chr2	75797225	75798951	8	28	2.63397e-05
chr2	79046500	79047051	8	9	2.63397e-05
chr2	80224575	80224926	6	6	0.00573824
chr2	84666600	84667476	6	11	0.00573824
chr2	90744625	90745126	6	7	0.00573824
chr2	92229275	92229826	6	8	0.00573824
chr2	94976725	94977201	6	7	0.00573824
chr2	101805600	101806351	6	10	0.00573824
chr2	102134750	102135301	6	8	0.00573824
chr2	102380725	102381051	6	6	0.00573824
chr2	102660100	102660876	8	13	2.63397e-05
chr2	106327275	106328451	22	37	<1.0E-10
chr2	106534225	106534576	6	6	0.00573824
chr2	106689350	106690076	7	12	0.000434787
chr2	109975200	109975801	7	10	0.000434787
chr2	113416000	113416351	6	6	0.00573824
chr2	113514625	113515576	6	12	0.00573824
chr2	115219625	115220001	8	8	2.63397e-05
chr2	115558950	115559426	6	7	0.00573824
chr2	115694675	115695426	8	12	2.63397e-05
chr2	115893125	115893776	7	10	0.000434787
chr2	116465500	116466401	13	21	<1.0E-10
chr2	116797375	116798126	6	9	0.00573824
chr2	116800975	116802301	7	19	0.000434787
chr2	118345625	118346176	7	9	0.000434787
chr2	118370225	118370751	6	7	0.00573824
chr2	118582700	118583151	6	7	0.00573824
chr2	119626225	119626601	6	6	0.00573824
chr2	121275000	121275551	6	8	0.00573824
chr2	123987925	123988326	6	6	0.00573824
chr2	125317925	125318551	10	13	5.9333e-08
chr2	125374375	125375126	6	11	0.00573824
chr2	126500825	126501301	6	6	0.00573824
chr2	127732875	127733551	6	9	0.00573824
chr2	128534725	128535651	7	13	0.000434787
chr2	128559300	128559701	6	6	0.00573824
chr2	129365525	129366401	21	27	<1.0E-10
chr2	129737200	129737776	7	9	0.000434787
chr2	131227475	131228501	6	13	0.00573824
chr2	131307375	131308926	11	27	2.29415e-09
chr2	133164650	133164976	7	8	0.000434787
chr2	133392075	133393276	10	21	5.9333e-08
chr2	133491925	133492851	9	17	1.34833e-06
chr2	134040275	134041451	12	23	<1.0E-10
chr2	136991750	136992351	7	10	0.000434787
chr2	137073600	137074376	7	12	0.000434787
chr2	137679075	137679626	8	9	2.63397e-05
chr2	137706050	137706826	9	15	1.34833e-06
chr2	141118500	141119226	7	9	0.000434787
chr2	141382400	141383001	6	9	0.00573824
chr2	141705375	141706226	6	10	0.00573824
chr2	141850200	141851301	12	23	<1.0E-10
chr2	141883525	141884051	7	8	0.000434787
chr2	141884125	141884701	7	9	0.000434787
chr2	144502475	144503001	9	10	1.34833e-06
chr2	144503150	144503626	6	7	0.00573824
chr2	152222125	152222601	7	8	0.000434787
chr2	152236575	152237451	9	17	1.34833e-06
chr2	152531525	152532401	8	14	2.63397e-05
chr2	152533100	152533826	9	12	1.34833e-06
chr2	152555250	152555851	7	11	0.000434787
chr2	152560525	152561476	19	29	<1.0E-10
chr2	152564700	152565926	15	26	<1.0E-10
chr2	153172050	153172776	7	11	0.000434787
chr2	154880300	154880876	8	11	2.63397e-05
chr2	155688550	155689476	6	11	0.00573824
chr2	157290275	157291001	7	11	0.000434787
chr2	158028650	158029001	6	6	0.00573824
chr2	158131775	158132176	6	6	0.00573824
chr2	163114325	163115176	6	11	0.00573824
chr2	163975950	163976401	8	9	2.63397e-05
chr2	164736950	164737476	7	9	0.000434787
chr2	165001775	165002251	8	8	2.63397e-05
chr2	165974425	165975001	9	11	1.34833e-06
chr2	165983500	165984101	8	11	2.63397e-05
chr2	166005675	166006101	8	9	2.63397e-05
chr2	166267150	166267701	6	7	0.00573824
chr2	166488825	166489276	6	6	0.00573824
chr2	166896950	166897601	6	9	0.00573824
chr2	167388925	167389701	9	14	1.34833e-06
chr2	167421375	167421926	10	12	5.9333e-08
chr2	167994175	167995351	8	20	2.63397e-05
chr2	168350700	168351451	8	13	2.63397e-05
chr2	168427125	168428001	8	13	2.63397e-05
chr2	168737800	168738726	7	16	0.000434787
chr2	169895825	169896526	9	13	1.34833e-06
chr2	170169675	170170201	7	9	0.000434787
chr2	170460375	170460901	8	10	2.63397e-05
chr2	171458650	171459876	14	27	<1.0E-10
chr2	171486925	171488101	9	18	1.34833e-06
chr2	171559800	171561051	21	51	<1.0E-10
chr2	172759150	172760176	8	17	2.63397e-05
chr2	172996900	172997676	6	11	0.00573824
chr2	173079100	173080001	8	17	2.63397e-05
chr2	174683650	174685001	7	23	0.000434787
chr2	178368675	178369226	7	9	0.000434787
chr2	179421800	179422276	6	6	0.00573824
chr2	180954475	180954976	6	6	0.00573824
chr3	6241650	6242251	6	8	0.00573824
chr3	6381700	6382351	6	9	0.00573824
chr3	6926725	6927051	6	6	0.00573824
chr3	7943250	7944651	23	44	<1.0E-10
chr3	8823750	8824226	7	9	0.000434787
chr3	9617125	9617676	7	9	0.000434787
chr3	9839675	9840226	7	9	0.000434787
chr3	21834350	21835526	10	19	5.9333e-08
chr3	21975350	21975801	11	12	2.29415e-09
chr3	25908500	25909051	6	7	0.00573824
chr3	27052775	27053201	7	7	0.000434787
chr3	29984825	29985426	6	9	0.00573824
chr3	30006475	30007726	9	22	1.34833e-06
chr3	30111325	30112501	8	17	2.63397e-05
chr3	30126600	30127801	8	21	2.63397e-05
chr3	30157125	30157626	6	7	0.00573824
chr3	30319200	30320226	6	13	0.00573824
chr3	30336625	30337351	6	8	0.00573824
chr3	30445500	30446376	6	11	0.00573824
chr3	31111425	31111926	7	8	0.000434787
chr3	31959025	31959576	7	9	0.000434787
chr3	34989475	34989926	6	7	0.00573824
chr3	37806200	37806851	6	9	0.00573824
chr3	38031500	38031901	6	7	0.00573824
chr3	38296025	38296451	6	6	0.00573824
chr3	39243075	39243626	7	9	0.000434787
chr3	39861075	39861951	10	18	5.9333e-08
chr3	40066925	40067526	6	9	0.00573824
chr3	40095050	40095851	8	12	2.63397e-05
chr3	40224650	40225126	7	7	0.000434787
chr3	41233725	41234176	6	7	0.00573824
chr3	41661225	41661976	7	10	0.000434787
chr3	49446175	49446851	7	11	0.000434787
chr3	49561075	49561701	10	13	5.9333e-08
chr3	50186125	50186551	6	7	0.00573824
chr3	51504800	51505651	7	11	0.000434787
chr3	51894950	51895801	6	10	0.00573824
chr3	51908725	51909301	8	11	2.63397e-05
chr3	51983500	51984176	6	9	0.00573824
chr3	55299525	55300901	16	34	<1.0E-10
chr3	55391850	55392726	8	12	2.63397e-05
chr3	55403250	55404126	7	13	0.000434787
chr3	60688775	60689326	6	6	0.00573824
chr3	63297625	63297926	6	6	0.00573824
chr3	65733300	65733876	6	8	0.00573824
chr3	68292175	68292876	6	11	0.00573824
chr3	68390250	68391176	6	12	0.00573824
chr3	68394325	68394726	8	9	2.63397e-05
chr3	69258825	69259176	6	6	0.00573824
chr3	70116500	70116976	7	8	0.000434787
chr3	78398475	78399201	7	13	0.000434787
chr3	80641425	80641876	6	7	0.00573824
chr3	80682475	80683076	10	13	5.9333e-08
chr3	80840625	80841451	7	12	0.000434787
chr3	80850850	80851926	13	25	<1.0E-10
chr3	83514775	83515126	8	9	2.63397e-05
chr3	83933150	83933901	6	9	0.00573824
chr3	84073600	84074651	6	13	0.00573824
chr3	85577950	85578351	7	8	0.000434787
chr3	85636225	85636676	6	6	0.00573824
chr3	86561625	86562276	6	10	0.00573824
chr3	88313750	88314451	16	21	<1.0E-10
chr3	88335825	88336626	6	12	0.00573824
chr3	89018025	89018601	6	8	0.00573824
chr3	89084575	89085026	8	8	2.63397e-05
chr3	89094625	89095601	7	15	0.000434787
chr3	96278525	96279001	6	7	0.00573824
chr3	97864650	97865051	7	7	0.000434787
chr3	97916525	97917076	7	7	0.000434787
chr3	99037925	99038451	6	8	0.00573824
chr3	99052350	99053051	7	12	0.000434787
chr3	99469825	99470501	25	30	<1.0E-10
chr3	99735125	99735426	6	6	0.00573824
chr3	99769750	99770876	9	21	1.34833e-06
chr3	101016275	101016876	7	10	0.000434787
chr3	101199200	101199651	9	10	1.34833e-06
chr3	101201550	101202701	8	14	2.63397e-05
chr3	101489550	101490026	6	6	0.00573824
chr3	104345300	104346001	7	13	0.000434787
chr3	107168375	107168876	6	6	0.00573824
chr3	107636875	107637651	6	10	0.00573824
chr3	107969275	107970301	7	13	0.000434787
chr3	108602850	108603351	6	6	0.00573824
chr3	121172025	121172526	6	8	0.00573824
chr3	121291750	121292676	11	18	2.29415e-09
chr3	121751150	121752151	9	18	1.34833e-06
chr3	123493975	123494626	8	12	2.63397e-05
chr3	125447625	125448101	6	8	0.00573824
chr3	126208650	126209176	8	8	2.63397e-05
chr3	126529125	126529876	7	11	0.000434787
chr3	127884050	127884601	13	14	<1.0E-10
chr3	129234750	129235376	6	9	0.00573824
chr3	129673425	129673926	6	7	0.00573824
chr3	129864200	129865101	7	12	0.000434787
chr3	130813350	130814026	6	10	0.00573824
chr3	132086000	132086401	6	7	0.00573824
chr3	132175750	132176051	6	7	0.00573824
chr3	133899325	133899851	7	8	0.000434787
chr3	136952700	136953151	6	8	0.00573824
chr3	137223750	137224501	7	12	0.000434787
chr3	137415950	137416376	6	7	0.00573824
chr3	138668600	138669101	6	7	0.00573824
chr3	141154600	141155126	8	10	2.63397e-05
chr3	141885775	141886201	7	7	0.000434787
chr3	141901125	141902126	19	30	<1.0E-10
chr3	143158200	143158851	6	9	0.00573824
chr3	144044050	144044601	7	8	0.000434787
chr3	146059725	146060251	6	8	0.00573824
chr3	147075050	147075676	8	11	2.63397e-05
chr3	147510900	147511426	7	8	0.000434787
chr3	147541525	147542076	8	10	2.63397e-05
chr3	148652200	148652726	6	7	0.00573824
chr3	148653125	148654526	6	18	0.00573824
chr3	151554525	151555426	6	13	0.00573824
chr3	151688100	151688501	6	7	0.00573824
chr3	153253100	153253826	6	9	0.00573824
chr4	5734650	5735626	11	17	2.29415e-09
chr4	13291825	13292426	6	8	0.00573824
chr4	13715150	13715501	7	7	0.000434787
chr4	14201250	14202026	6	11	0.00573824
chr4	20090775	20091426	9	14	1.34833e-06
chr4	24765775	24766251	6	6	0.00573824
chr4	31910225	31911301	8	15	2.63397e-05
chr4	32389850	32390451	6	10	0.00573824
chr4	35066550	35066926	6	6	0.00573824
chr4	41575075	41576051	8	15	2.63397e-05
chr4	41607850	41608301	6	7	0.00573824
chr4	43851550	43851876	6	6	0.00573824
chr4	45545300	45545676	7	7	0.000434787
chr4	45861300	45861826	6	7	0.00573824
chr4	54183300	54183776	11	11	2.29415e-09
chr4	54482875	54484351	8	21	2.63397e-05
chr4	57556475	57557126	7	11	0.000434787
chr4	57859000	57859726	11	14	2.29415e-09
chr4	57916675	57917326	6	8	0.00573824
chr4	58513925	58514851	6	14	0.00573824
chr4	58682625	58684451	21	52	<1.0E-10
chr4	58690550	58691401	7	10	0.000434787
chr4	58735575	58736251	8	12	2.63397e-05
chr4	65064275	65064751	7	8	0.000434787
chr4	65573300	65573976	6	8	0.00573824
chr4	70791850	70793176	14	27	<1.0E-10
chr4	72288550	72289226	9	11	1.34833e-06
chr4	72607500	72608051	6	8	0.00573824
chr4	81872500	81872976	6	8	0.00573824
chr4	82054350	82054851	8	9	2.63397e-05
chr4	82280075	82280801	7	14	0.000434787
chr4	83477175	83477776	9	11	1.34833e-06
chr4	83782750	83783926	8	18	2.63397e-05
chr4	84008075	84008676	6	8	0.00573824
chr4	85940825	85941626	6	10	0.00573824
chr4	86041400	86042101	8	12	2.63397e-05
chr4	87480200	87480626	8	8	2.63397e-05
chr4	94720250	94720826	6	8	0.00573824
chr4	94803975	94804776	6	11	0.00573824
chr4	94945350	94945851	6	7	0.00573824
chr4	94984250	94985226	26	41	<1.0E-10
chr4	95488350	95489376	9	18	1.34833e-06
chr4	96590950	96591401	6	6	0.00573824
chr4	97132550	97133201	6	8	0.00573824
chr4	97243900	97244526	6	9	0.00573824
chr4	97267875	97268351	6	7	0.00573824
chr4	97322800	97323326	9	10	1.34833e-06
chr4	97716050	97717076	11	16	2.29415e-09
chr4	97771225	97771601	6	6	0.00573824
chr4	97773750	97774226	6	7	0.00573824
chr4	97774825	97775626	7	12	0.000434787
chr4	97889550	97890801	13	27	<1.0E-10
chr4	97910200	97911301	15	27	<1.0E-10
chr4	98321150	98321626	6	6	0.00573824
chr4	98344025	98344926	8	16	2.63397e-05
chr4	100036850	100037201	6	6	0.00573824
chr4	100200000	100200776	7	11	0.000434787
chr4	100530000	100530551	6	8	0.00573824
chr4	102164125	102164651	8	9	2.63397e-05
chr4	104878850	104879301	6	7	0.00573824
chr4	105736675	105737476	8	16	2.63397e-05
chr4	105764425	105765526	8	16	2.63397e-05
chr4	105768700	105769126	6	6	0.00573824
chr4	105772825	105773526	6	10	0.00573824
chr4	105872325	105873126	8	13	2.63397e-05
chr4	106511925	106512826	6	15	0.00573824
chr4	106520175	106520926	6	11	0.00573824
chr4	106537725	106538801	18	31	<1.0E-10
chr4	106539450	106540051	6	8	0.00573824
chr4	106582725	106583201	10	10	5.9333e-08
chr4	107115400	107116751	8	19	2.63397e-05
chr4	107282100	107282776	6	9	0.00573824
chr4	108105850	108106651	9	16	1.34833e-06
chr4	111363625	111364101	7	7	0.000434787
chr4	114491550	114492051	6	6	0.00573824
chr4	114494475	114494976	7	8	0.000434787
chr4	115527550	115527951	6	6	0.00573824
chr4	115893200	115893526	6	6	0.00573824
chr4	116987425	116987776	6	6	0.00573824
chr4	117052375	117052951	6	8	0.00573824
chr4	117064375	117065326	9	19	1.34833e-06
chr4	117106900	117107601	7	11	0.000434787
chr4	117285750	117286476	7	12	0.000434787
chr4	117713350	117713926	6	8	0.00573824
chr4	117730650	117731201	7	9	0.000434787
chr4	118315550	118316051	6	7	0.00573824
chr4	120489700	120490051	6	7	0.00573824
chr4	120887750	120888276	6	7	0.00573824
chr4	122691125	122691601	6	6	0.00573824
chr4	122728175	122728576	6	6	0.00573824
chr4	122864600	122865101	6	7	0.00573824
chr4	123270925	123271326	6	6	0.00573824
chr4	125827550	125827901	6	7	0.00573824
chr4	127091400	127092151	6	10	0.00573824
chr4	127832600	127832976	6	7	0.00573824
chr4	128392850	128393776	10	19	5.9333e-08
chr4	128404075	128404551	8	9	2.63397e-05
chr4	128576325	128577026	11	15	2.29415e-09
chr4	129951475	129952176	6	8	0.00573824
chr4	130418675	130419326	6	8	0.00573824
chr4	131040525	131041326	6	10	0.00573824
chr4	131393525	131394426	6	12	0.00573824
chr4	132540150	132540651	7	8	0.000434787
chr4	132646550	132647351	6	9	0.00573824
chr4	132741100	132741651	6	8	0.00573824
chr4	132837675	132838601	8	14	2.63397e-05
chr4	133313475	133313776	6	6	0.00573824
chr4	133369200	133369801	6	8	0.00573824
chr4	134558350	134558776	6	6	0.00573824
chr4	134909200	134909751	6	8	0.00573824
chr4	135696050	135696876	10	17	5.9333e-08
chr4	135698100	135698626	6	8	0.00573824
chr4	135699175	135700276	9	16	1.34833e-06
chr4	136317400	136318151	6	10	0.00573824
chr4	138936150	138936676	6	8	0.00573824
chr4	139154950	139155476	12	13	<1.0E-10
chr4	140239825	140241076	6	18	0.00573824
chr4	140513700	140514151	6	7	0.00573824
chr4	144472600	144473376	7	11	0.000434787
chr4	144656725	144657276	6	8	0.00573824
chr4	148062250	148062651	6	6	0.00573824
chr4	148233750	148234251	6	7	0.00573824
chr4	148245825	148246751	6	13	0.00573824
chr4	148282325	148283176	8	14	2.63397e-05
chr4	148339125	148339601	7	7	0.000434787
chr4	149249975	149250976	12	20	<1.0E-10
chr4	149264325	149265851	8	19	2.63397e-05
chr4	149267225	149268326	13	25	<1.0E-10
chr4	149296625	149296951	6	6	0.00573824
chr4	149746575	149746976	8	8	2.63397e-05
chr4	149767600	149768151	6	8	0.00573824
chr4	150785950	150786301	6	6	0.00573824
chr4	150811325	150811676	6	6	0.00573824
chr4	154045350	154046001	6	10	0.00573824
chr4	154067600	154068401	13	21	<1.0E-10
chr4	154082275	154082801	8	9	2.63397e-05
chr4	154083675	154085001	9	24	1.34833e-06
chr4	154105150	154106051	6	12	0.00573824
chr4	154124500	154125226	7	11	0.000434787
chr4	154517775	154518776	7	15	0.000434787
chr4	154656750	154657926	6	16	0.00573824
chr5	4858250	4858651	7	7	0.000434787
chr5	12441600	12442151	7	7	0.000434787
chr5	12669075	12669576	6	7	0.00573824
chr5	13066825	13067201	6	7	0.00573824
chr5	13124925	13126126	10	19	5.9333e-08
chr5	15355675	15356276	9	12	1.34833e-06
chr5	22719175	22719476	6	6	0.00573824
chr5	31077275	31077601	6	6	0.00573824
chr5	31215575	31216076	8	9	2.63397e-05
chr5	33695425	33696226	6	11	0.00573824
chr5	36504550	36505126	6	7	0.00573824
chr5	36717150	36717676	7	8	0.000434787
chr5	38286475	38287501	9	16	1.34833e-06
chr5	38309025	38309651	9	12	1.34833e-06
chr5	38490425	38491076	9	13	1.34833e-06
chr5	38497475	38497851	6	6	0.00573824
chr5	45313525	45314251	14	18	<1.0E-10
chr5	45673725	45674276	6	8	0.00573824
chr5	45813325	45813676	6	6	0.00573824
chr5	49724375	49724801	7	8	0.000434787
chr5	51869375	51869776	6	7	0.00573824
chr5	53770700	53771401	7	10	0.000434787
chr5	54313800	54314301	7	8	0.000434787
chr5	65196875	65197901	7	14	0.000434787
chr5	65510475	65511126	8	10	2.63397e-05
chr5	67791725	67792651	6	13	0.00573824
chr5	68032325	68033426	7	14	0.000434787
chr5	74172825	74174551	15	39	<1.0E-10
chr5	74462725	74463251	6	8	0.00573824
chr5	74571525	74572151	6	8	0.00573824
chr5	74597500	74598776	9	21	1.34833e-06
chr5	74661850	74663076	22	41	<1.0E-10
chr5	74663550	74664201	8	10	2.63397e-05
chr5	74828975	74829601	8	11	2.63397e-05
chr5	75129850	75130551	6	9	0.00573824
chr5	75135375	75136101	6	8	0.00573824
chr5	75544075	75545001	8	15	2.63397e-05
chr5	75546275	75547401	6	16	0.00573824
chr5	75801200	75801801	6	9	0.00573824
chr5	75806725	75807276	7	9	0.000434787
chr5	78713550	78714301	6	10	0.00573824
chr5	81523800	81524276	8	9	2.63397e-05
chr5	82532275	82532751	8	9	2.63397e-05
chr5	93426600	93427126	6	8	0.00573824
chr5	93635550	93636051	6	7	0.00573824
chr5	96813500	96814201	6	9	0.00573824
chr5	98383475	98383876	7	7	0.000434787
chr5	98906275	98906626	6	7	0.00573824
chr5	99603950	99604476	8	9	2.63397e-05
chr5	99797850	99798376	14	16	<1.0E-10
chr5	99980675	99982326	14	36	<1.0E-10
chr5	99993575	99994126	6	8	0.00573824
chr5	100019975	100020551	8	11	2.63397e-05
chr5	101953150	101953626	6	7	0.00573824
chr5	102803050	102803851	7	13	0.000434787
chr5	103148550	103149076	7	8	0.000434787
chr5	103458400	103458801	6	6	0.00573824
chr5	104845125	104845626	6	7	0.00573824
chr5	107581075	107581451	6	6	0.00573824
chr5	107651050	107652051	9	18	1.34833e-06
chr5	109106650	109107051	6	6	0.00573824
chr5	111549650	111550026	6	6	0.00573824
chr5	111552225	111552751	8	10	2.63397e-05
chr5	111985100	111985501	6	6	0.00573824
chr5	112199050	112199551	8	8	2.63397e-05
chr5	112793300	112793801	12	13	<1.0E-10
chr5	113287400	113287801	6	6	0.00573824
chr5	113802650	113803401	6	9	0.00573824
chr5	114034250	114034726	9	9	1.34833e-06
chr5	114099950	114100751	6	9	0.00573824
chr5	114239150	114240151	6	12	0.00573824
chr5	114246325	114247351	8	14	2.63397e-05
chr5	114322775	114323226	6	6	0.00573824
chr5	115925850	115926351	8	9	2.63397e-05
chr5	116772450	116772951	6	6	0.00573824
chr5	118507275	118507926	6	9	0.00573824
chr5	118771375	118772226	8	13	2.63397e-05
chr5	118915325	118915901	6	9	0.00573824
chr5	119701250	119702026	6	10	0.00573824
chr5	125639900	125640226	6	6	0.00573824
chr5	125870100	125870726	7	10	0.000434787
chr5	125955725	125956251	6	7	0.00573824
chr5	127719900	127720626	8	13	2.63397e-05
chr5	127799175	127800151	6	13	0.00573824
chr5	127804100	127804576	10	11	5.9333e-08
chr5	127850675	127851351	10	14	5.9333e-08
chr5	129126075	129126601	6	7	0.00573824
chr5	129935800	129936576	6	12	0.00573824
chr5	130006875	130007526	6	8	0.00573824
chr5	132057100	132057951	8	13	2.63397e-05
chr5	132107600	132108276	8	13	2.63397e-05
chr5	132251375	132252201	10	18	5.9333e-08
chr5	132543350	132544101	6	10	0.00573824
chr5	133582725	133583326	6	9	0.00573824
chr5	134296975	134298001	8	17	2.63397e-05
chr5	134475550	134476501	6	12	0.00573824
chr5	134490650	134491201	7	9	0.000434787
chr5	134549225	134550001	9	15	1.34833e-06
chr5	134931800	134932426	6	9	0.00573824
chr5	135376950	135377601	10	14	5.9333e-08
chr5	136879500	136879826	6	7	0.00573824
chr5	137042950	137043451	6	7	0.00573824
chr5	137286575	137287226	8	12	2.63397e-05
chr5	137336850	137337751	6	12	0.00573824
chr5	137339800	137340301	6	7	0.00573824
chr5	138051775	138052726	6	13	0.00573824
chr5	139473175	139473976	10	15	5.9333e-08
chr5	139650825	139651401	6	8	0.00573824
chr5	140200675	140201051	6	7	0.00573824
chr5	141489250	141489851	6	9	0.00573824
chr5	143579175	143580151	9	16	1.34833e-06
chr5	143581150	143582451	8	18	2.63397e-05
chr5	143762700	143763451	9	13	1.34833e-06
chr5	144417800	144418151	6	6	0.00573824
chr5	147731275	147732601	14	27	<1.0E-10
chr5	147946075	147946501	6	7	0.00573824
chr5	149456775	149457426	6	8	0.00573824
chr5	149995800	149996301	6	7	0.00573824
chr5	150059275	150059826	12	13	<1.0E-10
chr5	150122900	150123851	25	43	<1.0E-10
chr5	150340700	150341226	9	10	1.34833e-06
chr5	151725725	151726201	6	6	0.00573824
chr5	151945350	151946026	8	12	2.63397e-05
chr5	152170725	152171551	6	11	0.00573824
chr6	4433975	4434501	8	10	2.63397e-05
chr6	4503950	4504801	6	11	0.00573824
chr6	4507300	4507976	8	11	2.63397e-05
chr6	5956050	5956501	8	8	2.63397e-05
chr6	5977500	5978276	7	11	0.000434787
chr6	16652975	16653651	6	9	0.00573824
chr6	17586900	17587401	6	6	0.00573824
chr6	19150300	19150726	6	6	0.00573824
chr6	21975350	21976801	15	36	<1.0E-10
chr6	28932450	28932926	6	8	0.00573824
chr6	30410100	30411151	10	16	5.9333e-08
chr6	30475450	30476401	7	13	0.000434787
chr6	30488350	30488701	6	6	0.00573824
chr6	30493475	30494101	7	11	0.000434787
chr6	30632275	30632951	6	9	0.00573824
chr6	30643725	30644201	8	9	2.63397e-05
chr6	31546225	31546701	6	7	0.00573824
chr6	32129425	32130176	8	13	2.63397e-05
chr6	32318275	32318851	11	14	2.29415e-09
chr6	33928075	33928526	6	7	0.00573824
chr6	34060825	34061226	7	7	0.000434787
chr6	34066575	34067426	6	11	0.00573824
chr6	35304150	35305251	13	21	<1.0E-10
chr6	36688900	36689201	6	6	0.00573824
chr6	36734775	36735351	6	8	0.00573824
chr6	37161200	37161751	6	7	0.00573824
chr6	37342025	37342926	7	13	0.000434787
chr6	37357550	37358076	7	8	0.000434787
chr6	37996800	37997326	9	10	1.34833e-06
chr6	47600925	47601476	10	12	5.9333e-08
chr6	50955375	50956351	6	12	0.00573824
chr6	51002075	51003126	7	14	0.000434787
chr6	51069450	51070001	6	8	0.00573824
chr6	51128550	51128926	6	6	0.00573824
chr6	51146275	51148026	13	41	<1.0E-10
chr6	52170975	52171526	6	7	0.00573824
chr6	52171725	52172926	9	25	1.34833e-06
chr6	52176000	52176976	13	24	<1.0E-10
chr6	52177675	52178176	8	10	2.63397e-05
chr6	52180250	52181326	6	15	0.00573824
chr6	52183450	52183901	6	7	0.00573824
chr6	52189775	52190626	7	13	0.000434787
chr6	52194400	52195101	7	10	0.000434787
chr6	52215600	52216226	7	10	0.000434787
chr6	52393300	52393951	8	12	2.63397e-05
chr6	52489850	52490401	6	8	0.00573824
chr6	52551475	52551976	9	9	1.34833e-06
chr6	52788350	52789251	6	12	0.00573824
chr6	52898100	52898651	6	8	0.00573824
chr6	52917225	52918326	18	28	<1.0E-10
chr6	52937375	52938301	7	14	0.000434787
chr6	52970075	52970726	6	10	0.00573824
chr6	52973400	52973826	7	7	0.000434787
chr6	53533275	53533976	8	12	2.63397e-05
chr6	61166475	61167351	8	15	2.63397e-05
chr6	65873525	65874076	7	9	0.000434787
chr6	71024650	71025201	8	10	2.63397e-05
chr6	72138625	72139101	6	7	0.00573824
chr6	72166350	72167401	15	33	<1.0E-10
chr6	72605300	72606151	9	14	1.34833e-06
chr6	72626950	72628151	8	16	2.63397e-05
chr6	72661175	72662601	18	40	<1.0E-10
chr6	75749500	75749926	6	7	0.00573824
chr6	83071575	83072826	7	17	0.000434787
chr6	83086650	83087901	9	22	1.34833e-06
chr6	84141325	84142426	16	28	<1.0E-10
chr6	84147175	84148501	26	47	<1.0E-10
chr6	84178650	84179251	6	10	0.00573824
chr6	84179775	84180426	8	10	2.63397e-05
chr6	84360000	84360476	7	8	0.000434787
chr6	84974375	84974826	6	7	0.00573824
chr6	85441575	85442276	9	14	1.34833e-06
chr6	87169550	87170126	8	10	2.63397e-05
chr6	91186025	91186751	7	11	0.000434787
chr6	92364750	92365176	7	8	0.000434787
chr6	93016300	93017151	7	13	0.000434787
chr6	93493350	93493851	8	9	2.63397e-05
chr6	93862275	93863426	6	14	0.00573824
chr6	94286600	94287026	6	6	0.00573824
chr6	94577450	94578326	13	23	<1.0E-10
chr6	96088900	96089251	6	6	0.00573824
chr6	97186100	97186576	6	8	0.00573824
chr6	99109825	99110476	6	9	0.00573824
chr6	99837850	99838376	14	15	<1.0E-10
chr6	100070025	100070501	6	7	0.00573824
chr6	100171000	100171526	6	7	0.00573824
chr6	100879500	100880426	10	19	5.9333e-08
chr6	101213450	101214026	7	9	0.000434787
chr6	101230700	101231326	9	13	1.34833e-06
chr6	113749150	113749676	6	8	0.00573824
chr6	114717650	114718076	6	6	0.00573824
chr6	117103925	117104326	6	7	0.00573824
chr6	117356950	117357776	8	13	2.63397e-05
chr6	118933725	118934376	6	9	0.00573824
chr6	118934525	118934876	6	6	0.00573824
chr6	119585700	119586101	7	8	0.000434787
chr6	120976100	120976751	8	10	2.63397e-05
chr6	122441550	122442026	7	8	0.000434787
chr6	122715900	122716701	14	21	<1.0E-10
chr6	124869350	124870376	6	14	0.00573824
chr6	125107025	125107376	6	6	0.00573824
chr6	125758925	125759401	9	10	1.34833e-06
chr6	125826700	125827401	10	14	5.9333e-08
chr6	126036325	126037076	7	9	0.000434787
chr6	127102100	127102426	6	6	0.00573824
chr6	127104050	127104451	6	7	0.00573824
chr6	127105725	127106201	6	7	0.00573824
chr6	134877900	134878376	6	6	0.00573824
chr6	136416800	136417976	12	22	<1.0E-10
chr6	136418625	136419876	17	35	<1.0E-10
chr6	136741475	136742226	6	10	0.00573824
chr6	136896375	136896726	6	6	0.00573824
chr6	137419650	137420051	6	7	0.00573824
chr6	143448250	143448776	7	8	0.000434787
chr6	143478850	143480076	6	15	0.00573824
chr6	143995775	143996151	6	6	0.00573824
chr6	144159150	144159576	6	7	0.00573824
chr6	144261050	144261976	6	12	0.00573824
chr6	144736250	144736751	6	7	0.00573824
chr6	144893050	144894076	23	36	<1.0E-10
chr6	145289000	145289476	6	7	0.00573824
chr6	145381525	145382151	6	10	0.00573824
chr6	145553700	145554251	7	9	0.000434787
chr6	147126400	147126876	6	8	0.00573824
chr6	147375250	147375976	7	12	0.000434787
chr6	148305175	148305651	7	7	0.000434787
chr7	4966575	4967226	8	11	2.63397e-05
chr7	6196175	6196626	8	9	2.63397e-05
chr7	6362800	6363201	6	6	0.00573824
chr7	6722800	6723701	8	14	2.63397e-05
chr7	6734075	6734651	12	15	<1.0E-10
chr7	6787675	6788701	11	20	2.29415e-09
chr7	17476200	17477201	7	14	0.000434787
chr7	19905150	19905876	8	14	2.63397e-05
chr7	20308050	20308551	6	7	0.00573824
chr7	25179725	25180201	7	8	0.000434787
chr7	28376975	28377276	6	6	0.00573824
chr7	29708850	29709651	6	11	0.00573824
chr7	30196700	30197126	9	9	1.34833e-06
chr7	30269025	30269651	6	9	0.00573824
chr7	30768600	30769351	6	10	0.00573824
chr7	35439325	35439926	6	9	0.00573824
chr7	38123000	38123801	6	12	0.00573824
chr7	38976325	38976901	6	9	0.00573824
chr7	52125025	52125376	6	6	0.00573824
chr7	53277250	53277651	8	9	2.63397e-05
chr7	56767125	56767676	9	10	1.34833e-06
chr7	59027700	59028276	6	9	0.00573824
chr7	59087450	59087901	6	7	0.00573824
chr7	59224675	59225501	9	15	1.34833e-06
chr7	70164250	70164851	6	9	0.00573824
chr7	73183725	73184976	6	17	0.00573824
chr7	74114325	74114801	6	7	0.00573824
chr7	74257750	74258176	6	8	0.00573824
chr7	75408200	75409076	7	13	0.000434787
chr7	75448550	75449301	9	14	1.34833e-06
chr7	75589200	75589751	10	12	5.9333e-08
chr7	75687350	75687751	6	6	0.00573824
chr7	77769450	77770651	6	15	0.00573824
chr7	77889025	77889676	18	23	<1.0E-10
chr7	78676050	78676751	7	10	0.000434787
chr7	78691375	78691976	13	15	<1.0E-10
chr7	79294925	79295401	6	7	0.00573824
chr7	81317850	81318626	7	12	0.000434787
chr7	82404675	82405501	8	13	2.63397e-05
chr7	82473875	82474476	6	9	0.00573824
chr7	88871300	88872126	7	13	0.000434787
chr7	89531450	89532451	10	22	5.9333e-08
chr7	90209050	90210076	15	24	<1.0E-10
chr7	90438150	90439076	15	22	<1.0E-10
chr7	90607975	90608576	8	12	2.63397e-05
chr7	90624175	90624701	6	8	0.00573824
chr7	90851850	90852551	6	9	0.00573824
chr7	90962050	90962926	8	15	2.63397e-05
chr7	90995725	90996551	7	12	0.000434787
chr7	96604725	96605876	7	17	0.000434787
chr7	97129225	97129751	7	8	0.000434787
chr7	97277925	97278551	6	9	0.00573824
chr7	102868500	102869026	6	7	0.00573824
chr7	103532525	103532951	6	7	0.00573824
chr7	103758000	103759026	9	18	1.34833e-06
chr7	103799000	103799501	6	6	0.00573824
chr7	103800275	103801101	8	14	2.63397e-05
chr7	103805550	103806051	6	7	0.00573824
chr7	103809150	103809751	12	15	<1.0E-10
chr7	103941150	103942001	6	12	0.00573824
chr7	103951075	103951601	6	6	0.00573824
chr7	105509875	105510426	7	8	0.000434787
chr7	106105575	106106576	11	26	2.29415e-09
chr7	107436350	107437251	6	11	0.00573824
chr7	107933050	107933776	7	10	0.000434787
chr7	112926675	112927176	8	10	2.63397e-05
chr7	115940725	115941576	20	28	<1.0E-10
chr7	117204550	117205001	6	6	0.00573824
chr7	118266050	118266601	6	7	0.00573824
chr7	118299550	118299976	6	7	0.00573824
chr7	118668750	118669351	8	11	2.63397e-05
chr7	119533400	119533926	8	9	2.63397e-05
chr7	119534075	119534901	7	12	0.000434787
chr7	119887050	119887526	7	8	0.000434787
chr7	119969650	119970226	7	10	0.000434787
chr7	122740625	122741301	10	15	5.9333e-08
chr7	122759275	122759651	7	7	0.000434787
chr7	122767975	122769051	9	19	1.34833e-06
chr7	122788900	122789601	7	11	0.000434787
chr7	122810375	122810851	6	7	0.00573824
chr7	125272475	125273176	6	9	0.00573824
chr7	125998825	125999476	6	8	0.00573824
chr7	128180725	128181251	6	8	0.00573824
chr7	128693075	128693576	12	13	<1.0E-10
chr7	130227700	130228551	6	11	0.00573824
chr7	130241275	130242026	10	16	5.9333e-08
chr7	130992700	130993076	6	6	0.00573824
chr7	131182725	131183126	6	7	0.00573824
chr7	133415125	133415801	6	9	0.00573824
chr7	133777475	133778076	6	8	0.00573824
chr7	135019150	135019751	6	8	0.00573824
chr7	135148300	135148951	7	10	0.000434787
chr7	136821725	136823226	6	18	0.00573824
chr7	139206875	139207326	6	7	0.00573824
chr7	143055175	143055851	7	10	0.000434787
chr7	143250625	143251101	6	7	0.00573824
chr7	143405475	143406426	11	20	2.29415e-09
chr7	143533700	143534526	6	9	0.00573824
chr7	143581875	143582601	6	10	0.00573824
chr7	143799075	143800201	6	14	0.00573824
chr7	144036900	144037401	6	7	0.00573824
chr7	144413275	144413701	7	7	0.000434787
chr7	144749050	144749551	13	14	<1.0E-10
chr7	146204350	146205276	11	21	2.29415e-09
chr7	146549775	146550326	6	8	0.00573824
chr7	148125850	148126351	7	9	0.000434787
chr7	149025950	149026226	6	6	0.00573824
chr7	149672675	149673251	10	12	5.9333e-08
chr7	149724025	149724826	6	12	0.00573824
chr7	149733600	149735151	14	35	<1.0E-10
chr7	149738450	149738976	7	8	0.000434787
chr7	149739775	149740401	7	9	0.000434787
chr7	149756500	149758026	6	20	0.00573824
chr7	150194625	150195451	8	13	2.63397e-05
chr7	150437050	150437726	6	9	0.00573824
chr7	152367025	152367726	7	11	0.000434787
chr7	152392000	152392676	8	12	2.63397e-05
chr8	4656475	4656801	6	6	0.00573824
chr8	8103425	8103976	9	10	1.34833e-06
chr8	9055050	9056001	8	13	2.63397e-05
chr8	10924200	10925651	7	19	0.000434787
chr8	11298600	11299276	6	9	0.00573824
chr8	11585625	11586476	6	11	0.00573824
chr8	11636525	11637051	6	7	0.00573824
chr8	12051225	12051576	6	6	0.00573824
chr8	14320975	14321976	8	19	2.63397e-05
chr8	23918475	23919051	6	8	0.00573824
chr8	23969700	23970126	6	7	0.00573824
chr8	26551525	26552026	6	7	0.00573824
chr8	26653775	26654526	7	12	0.000434787
chr8	27783100	27783951	8	13	2.63397e-05
chr8	27941725	27942176	6	6	0.00573824
chr8	27943675	27944326	6	9	0.00573824
chr8	28024750	28025201	6	8	0.00573824
chr8	28084100	28085151	7	15	0.000434787
chr8	28200300	28200751	9	10	1.34833e-06
chr8	28323700	28324376	6	10	0.00573824
chr8	31089050	31089551	6	8	0.00573824
chr8	34818575	34819476	8	13	2.63397e-05
chr8	34954175	34954576	7	8	0.000434787
chr8	35869250	35869726	6	6	0.00573824
chr8	37674600	37675376	7	12	0.000434787
chr8	37731450	37732301	10	15	5.9333e-08
chr8	37751900	37752551	8	12	2.63397e-05
chr8	42067150	42067626	7	8	0.000434787
chr8	42678150	42678726	7	10	0.000434787
chr8	48048525	48049501	8	15	2.63397e-05
chr8	59093575	59094126	6	8	0.00573824
chr8	59101400	59101851	10	10	5.9333e-08
chr8	59990200	59990551	6	6	0.00573824
chr8	64107975	64108726	8	14	2.63397e-05
chr8	70606075	70608201	7	29	0.000434787
chr8	73133500	73133976	8	9	2.63397e-05
chr8	73222475	73222951	11	12	2.29415e-09
chr8	74842450	74843026	9	11	1.34833e-06
chr8	80042650	80043226	6	8	0.00573824
chr8	80235225	80236276	8	15	2.63397e-05
chr8	80339225	80339701	6	6	0.00573824
chr8	80494325	80494851	6	8	0.00573824
chr8	81732550	81734001	7	21	0.000434787
chr8	82842050	82843076	7	14	0.000434787
chr8	84336025	84336476	6	6	0.00573824
chr8	86263200	86263701	6	7	0.00573824
chr8	86386625	86386976	7	7	0.000434787
chr8	86721200	86722701	8	24	2.63397e-05
chr8	87179050	87180801	9	29	1.34833e-06
chr8	87186575	87187101	6	7	0.00573824
chr8	87187375	87187876	6	7	0.00573824
chr8	87236325	87236901	6	9	0.00573824
chr8	87246275	87247401	6	13	0.00573824
chr8	87266300	87267201	8	15	2.63397e-05
chr8	89897250	89898776	13	27	<1.0E-10
chr8	90355175	90356201	9	17	1.34833e-06
chr8	90360500	90361876	6	17	0.00573824
chr8	90419550	90420426	6	10	0.00573824
chr8	91631300	91632501	6	15	0.00573824
chr8	91912700	91913101	6	7	0.00573824
chr8	92064800	92065626	6	10	0.00573824
chr8	92969500	92970076	6	8	0.00573824
chr8	93385325	93386451	12	23	<1.0E-10
chr8	93478525	93479026	6	7	0.00573824
chr8	94203475	94204001	6	7	0.00573824
chr8	95394125	95394576	6	7	0.00573824
chr8	97958575	97959226	7	9	0.000434787
chr8	99775175	99775801	9	12	1.34833e-06
chr8	105455050	105455826	8	14	2.63397e-05
chr8	105506775	105508376	14	32	<1.0E-10
chr8	105838425	105839001	7	9	0.000434787
chr8	106337800	106338701	11	17	2.29415e-09
chr8	108146925	108147451	7	8	0.000434787
chr8	109035475	109036001	6	7	0.00573824
chr8	109996075	109997176	9	18	1.34833e-06
chr8	110351225	110351826	6	8	0.00573824
chr8	110551250	110552201	9	18	1.34833e-06
chr8	111998400	111998826	7	7	0.000434787
chr8	117725600	117726076	6	8	0.00573824
chr8	118724450	118724851	6	6	0.00573824
chr8	118753475	118754276	6	11	0.00573824
chr8	119994350	119994801	6	6	0.00573824
chr8	122715025	122715526	8	9	2.63397e-05
chr8	122799525	122800901	10	26	5.9333e-08
chr8	122859375	122860126	7	11	0.000434787
chr8	123824525	123825951	15	33	<1.0E-10
chr8	123901800	123902276	6	8	0.00573824
chr8	124211675	124212201	7	8	0.000434787
chr8	125185125	125185501	6	7	0.00573824
chr8	126742600	126743051	7	8	0.000434787
chr8	127707675	127708051	6	7	0.00573824
chr8	128050975	128051426	7	8	0.000434787
chr8	128998800	128999176	6	6	0.00573824
chr8	129190100	129191151	17	30	<1.0E-10
chr8	129350200	129350826	9	13	1.34833e-06
chr8	129901625	129902251	6	9	0.00573824
chr8	130333150	130333901	9	13	1.34833e-06
chr9	6668100	6668751	7	10	0.000434787
chr9	13322525	13323251	6	9	0.00573824
chr9	13486050	13486501	7	8	0.000434787
chr9	13694500	13695176	6	8	0.00573824
chr9	22813775	22814301	6	7	0.00573824
chr9	22831975	22832376	6	6	0.00573824
chr9	22834275	22834826	6	7	0.00573824
chr9	22938675	22939451	7	11	0.000434787
chr9	25334600	25335251	7	11	0.000434787
chr9	27745100	27745626	8	9	2.63397e-05
chr9	29125875	29127126	20	35	<1.0E-10
chr9	32302325	32303301	7	15	0.000434787
chr9	32350350	32350901	6	8	0.00573824
chr9	32527850	32528401	8	10	2.63397e-05
chr9	32794325	32795226	9	13	1.34833e-06
chr9	32869975	32870576	9	12	1.34833e-06
chr9	33837175	33837826	7	10	0.000434787
chr9	35134200	35135276	8	18	2.63397e-05
chr9	35147550	35148926	9	23	1.34833e-06
chr9	35170675	35171076	10	11	5.9333e-08
chr9	35212925	35213526	7	9	0.000434787
chr9	35246425	35246976	6	8	0.00573824
chr9	35337275	35338251	6	14	0.00573824
chr9	36740625	36741226	7	10	0.000434787
chr9	36837900	36838376	7	9	0.000434787
chr9	36860400	36861176	6	10	0.00573824
chr9	36861600	36862651	12	20	<1.0E-10
[truncated: 107 more rows]
